# Supplementary material for: Chromosome 9p copy number gains involving PD-L1 are associated with a specific proliferation and immune-modulating gene expression program active across major cancer types
Source: BMC Med Genomics. 2017 Dec 6;10:74. doi: 10.1186/s12920-017-0308-8 (PMC5719741; doi:10.1186/s12920-017-0308-8)
Supplement: Supplementary file 1 — Gene list of 75 top up-regulated genes identified in a genome-wide transcriptome analysis across 22 cancer types. The list was obtained by filtering for genes harboring significant and at least 1.5-fold enhanced mRNA expression in tumors with PD-L1 gains across at least 6 cancer types. Pan-cancer p-values were calculated using Fisher’s method (* = significant, ** = significant after Bonferroni correction for 22,849 genes). The set of 75 genes was enriched for the chromosomal regions 9p13 to 9p24 (36 genes) as well as the biological processes ‘cell cycle’ (22 genes) and ‘immune system process’ (16 genes). (XLSX 34 kb) [file 12920_2017_308_MOESM1_ESM.xlsx]

## Sheet: suppl_tab_1_sig
gene	p_pan-cancer	sig_pan-cancer	CHROMOSOME	GO_CELL_CYCLE	GO_IMMUNE_SYSTEM_PROCESS	fc_blca_tcga	p_blca_tcga	fc_brca_tcga_pub2015	p_brca_tcga_pub2015	fc_coadread_tcga	p_coadread_tcga	fc_gbm_tcga	p_gbm_tcga	fc_hnsc_tcga	p_hnsc_tcga	fc_kirc_tcga	p_kirc_tcga	fc_lgg_tcga	p_lgg_tcga	fc_lihc_tcga	p_lihc_tcga	fc_luad_tcga	p_luad_tcga	fc_lusc_tcga	p_lusc_tcga	fc_ov_tcga	p_ov_tcga	fc_skcm_tcga	p_skcm_tcga	fc_ucec_tcga	p_ucec_tcga	fc_paad_tcga	p_paad_tcga	fc_sarc_tcga	p_sarc_tcga	fc_thca_tcga_pub	p_thca_tcga_pub	fc_cesc_tcga	p_cesc_tcga	fc_kirp_tcga	p_kirp_tcga	fc_pcpg_tcga	p_pcpg_tcga	fc_prad_tcga	p_prad_tcga	fc_stad_tcga_pub	p_stad_tcga_pub
ADAMDEC1	1.92449e-06	**	8p21.2	no	yes	1.89	0.0055	1.39	0.039	-1.01	0.93	1.49	0.36	1.51	0.0053	-1.42	0.49	1.46	0.4	-1.16	0.65	1.4	0.087	1.76	0.00029	1.58	0.031	1.14	0.71	1.52	0.18	1.13	0.87	1.31	0.38	1.31	0.44	1.91	0.0055	-2.3	0.2	3.89	0.089	1.93	0.0089	-1.07	0.65
AK3	2.11008e-134	**	9p24.1	no	no	1.73	8.2e-18	1.34	3.8e-14	1.4	8.5e-18	1.32	0.0019	1.77	1e-21	1.42	0.00086	1.16	0.14	1.58	0.0011	1.38	3.4e-09	1.97	3.5e-25	1.73	9.6e-23	2.06	2.6e-05	1.5	0.0003	1.45	1.5e-08	1.37	2.7e-06	1.12	0.47	1.49	8.3e-07	1.57	0.18	1.2	0.15	1.05	0.32	1.37	0.00012
APLN	2.37092e-06	*	Xq25	no	yes	1.28	0.095	1.14	0.11	1.18	0.15	-1.06	0.79	1.06	0.59	-1.78	0.056	1.22	0.33	-1.22	0.39	-1.12	0.34	1.04	0.68	-1	1	1.3	0.21	1.25	0.19	3.61	0.085	1.67	0.0075	3.03	0.021	1.6	0.019	1.91	0.00059	-1.71	0.47	1.71	0.047	1.53	0.0035
ARHGEF39	1.61895e-51	**	9p13.3	no	no	1.53	1.8e-08	1.72	3.3e-15	1.26	0.00018	1.86	0.0022	1.52	2e-10	-1.04	0.83	2.04	0.004	1.45	0.041	1.55	8.5e-07	1.56	4e-09	1.44	8.7e-06	1.46	0.0049	1.74	0.00017	1.75	0.025	1.4	0.0078	1.07	0.57	1.13	0.042	2.31	0.14	1.39	0.41	1.42	0.0025	1.12	0.31
ASPM	1.45902e-20	**	1q31	yes	no	1.33	0.0018	1.65	8.9e-08	-1	0.99	1.68	0.0032	1.12	0.067	-1.08	0.84	4.25	0.0014	1.32	0.13	1.33	0.019	1.22	0.0026	1.13	0.14	1.2	0.38	1.98	9.7e-07	1.67	0.39	1.51	0.0062	-1.55	0.09	-1	0.99	15.05	0.089	1.57	0.27	1.96	6.6e-05	1.38	0.0019
CA9	8.64037e-11	**	9p13.3	no	no	1.36	0.28	4.92	5.5e-11	1.29	0.24	3.55	0.016	2.12	2.8e-05	-3.07	0.18	1.32	0.17	3.08	0.049	2.01	0.033	1.22	0.41	1.41	0.092	-1.01	0.98	1.92	0.15	2.26	0.23	2.48	0.028	1.3	0.6	-1.05	0.85	2.09	0.62	4.23	0.51	-1.13	0.27	-1.1	0.73
CBWD1	4.18052e-78	**	9p24.3	no	no	1.51	4.9e-12	1.52	1.3e-18	1.41	7.3e-11	1.42	0.019	1.57	5.8e-12	1.44	0.014	1.33	0.044	1.45	0.0066	1.39	1.3e-06	1.65	1.4e-12	1.53	2e-09	1.6	1.7e-05	1.42	0.0057	1.6	0.0017	1.29	0.002	1.03	0.9	1.36	0.00023	1.5	0.19	1.11	0.46	1.18	0.054	1.44	5.8e-05
CCDC171	1.66124e-37	**	9p22.3	no	no	1.61	4e-08	1.27	3.8e-05	1.33	2.9e-05	1.95	0.0023	1.36	2.8e-05	1.15	0.4	1.39	0.029	1.5	0.031	1.42	0.00015	1.71	6.9e-10	1.68	1e-09	1.53	0.013	1.59	0.022	1.37	0.23	1.21	0.12	1.47	0.18	1.21	0.06	2.23	0.2	-1.43	0.2	1.33	0.0042	1.06	0.022
CCL4	2.94838e-13	**	17q12	no	yes	2.08	0.0001	1.27	0.0085	1.05	0.65	1.99	0.034	1.72	2.5e-07	-1.68	0.045	-1.41	0.5	-1.24	0.41	1.11	0.38	1.44	0.00033	1.09	0.54	1.1	0.69	-1.24	0.41	-1.16	0.74	1.7	0.016	2.51	0.17	1.75	0.00012	-2.84	0.03	-2.27	0.2	1.5	0.029	1.02	0.93
CCL8	4.73028e-12	**	17q11.2	no	yes	1.98	0.00056	1.69	1.6e-05	1.27	0.17	1.6	0.19	1.71	2.1e-05	-1.18	0.43	-1.19	0.52	-1.14	0.66	1.18	0.32	1.59	0.00077	1.37	0.034	1.28	0.35	2.16	0.016	1.67	0.54	1.57	0.07	3.15	0.058	1.6	0.012	-1.22	0.19	-1.61	0.63	1.77	0.013	1.02	0.88
CD274	2.41714e-62	**	9p24	no	yes	4.07	7.7e-14	1.26	0.016	1.06	0.62	1.35	0.34	2.9	1.3e-16	1.68	0.18	-1.04	0.88	1.17	0.52	1.77	0.00078	4.9	1.6e-27	1.71	5.2e-07	2.2	0.0073	1.41	0.17	1.97	0.14	1.89	0.0028	1.46	0.45	2.74	2.5e-08	1.57	0.44	-2.6	0.27	1.81	0.0009	1.76	0.0026
CDC20	6.43685e-23	**	1p34.1	yes	no	1.35	0.00038	1.8	2.3e-08	-1.15	0.019	1.64	0.015	1.27	2.7e-05	1.49	0.26	3.7	0.00057	1.5	0.13	1.36	0.0051	1.07	0.27	1.18	0.068	1.26	0.08	1.53	0.0013	1.29	0.7	1.76	0.00049	-1.22	0.33	1.03	0.59	3.93	0.046	2.02	0.077	1.8	0.00017	1.37	0.019
CDC37L1	1.59347e-163	**	9p24.1	no	no	1.66	2.7e-22	1.45	4.3e-25	1.42	1.6e-23	1.58	2.4e-06	1.85	1.3e-25	1.59	0.00013	1.31	2.8e-05	1.57	0.0002	1.52	4.2e-12	1.74	4.1e-18	1.66	8.5e-21	1.93	1.5e-06	1.51	0.00022	1.17	0.33	1.5	1e-05	1.28	0.055	1.54	7.1e-10	1.39	0.13	1.24	0.067	1.11	0.033	1.5	3.4e-09
CDCA8	3.69521e-23	**	1p34.3	yes	no	1.28	0.00027	1.7	1.5e-09	-1.02	0.75	1.53	0.017	1.09	0.085	1.36	0.31	3.51	0.00029	1.42	0.077	1.28	0.0078	1.1	0.11	1.11	0.21	1.12	0.3	1.71	2.4e-05	1.57	0.29	1.7	9.3e-05	-1.28	0.14	-1.07	0.18	3.41	0.094	1.92	0.0089	1.47	0.00012	1.31	0.018
CDKN2A	5.9975e-23	**	9p21	yes	no	4.22	3.3e-06	2.41	1.3e-09	1.41	0.015	2.17	0.24	-1.1	0.72	1.52	0.2	1.3	0.55	1.53	0.26	1.61	0.057	1.27	0.41	2.62	8.2e-08	-1.18	0.72	5.62	3.2e-09	-2.81	0.28	1.7	0.091	1.03	0.94	1.64	0.0011	1.48	0.25	-1.26	0.67	1.36	0.075	1.83	0.019
CDKN2B.AS1	1.78124e-17	**	9p21.3	no	no	2.72	9.8e-08	1.51	2.4e-05	1.19	0.32	1.73	0.28	1.31	0.06	1.05	0.83	1.42	0.29	1.47	0.093	1.33	0.092	1.41	0.039	2.04	1.2e-06	-1.33	0.34	2.81	0.00012	1.09	0.85	1.71	0.013	-1.07	0.79	1.59	0.00019	-1	0.99	-1.19	0.72	1.41	0.0014	-1	0.94
CENPA	6.93245e-19	**	2p23.3	yes	no	1.48	3.5e-05	1.75	3.5e-07	1.02	0.7	1.32	0.11	1.07	0.23	1.48	0.24	3.15	0.0012	1.41	0.18	1.46	0.0029	1.14	0.023	1.18	0.063	1.22	0.086	1.61	0.00013	1.73	0.44	1.52	0.0011	-1.21	0.33	-1.07	0.25	4.46	0.041	1.15	0.56	1.55	0.0059	1.46	0.00041
CENPF	7.08758e-18	**	1q41	yes	no	1.24	0.011	1.53	1.2e-07	-1.03	0.67	1.58	0.018	1.06	0.34	1	1	3.75	0.00035	1.34	0.16	1.28	0.027	1.13	0.088	1.16	0.075	1.11	0.58	1.73	5.4e-05	1.58	0.39	1.44	0.0084	-1.47	0.31	-1.06	0.32	6.95	0.046	1.89	0.087	1.88	2.8e-05	1.58	0.00038
CENPI	4.04473e-16	**	Xq22.1	yes	no	1.58	5.9e-06	1.45	0.00017	-1.04	0.57	1.66	0.0055	-1.01	0.91	1.48	0.25	2.23	0.011	1.64	0.032	1.38	0.018	1.18	0.014	1.12	0.24	1.2	0.24	1.93	0.00016	1.85	0.25	1.44	0.0061	-1.2	0.065	1.01	0.94	4.97	0.21	-1.11	0.84	1.85	0.0002	1.24	0.0024
CLSPN	1.70252e-12	**	1p34.2	yes	no	1.61	0.00017	1.4	0.00073	-1.05	0.52	1.58	0.016	1.1	0.22	1.33	0.34	3.64	0.00024	1.58	0.077	1.29	0.065	1.12	0.14	1.16	0.15	1.19	0.38	1.89	0.0013	1.51	0.55	1.64	0.0046	-1.41	0.084	-1.15	0.21	5.76	0.089	1.52	0.53	1.66	0.012	1.2	0.015
CNTLN	2.28109e-39	**	9p22.2	no	no	2.17	5e-08	1.35	3.6e-05	1.17	0.16	1.47	0.0078	1.43	5.6e-06	1.18	0.27	1.69	0.0011	1.59	0.0025	1.4	0.009	1.81	1.4e-11	1.76	1.1e-11	1.73	7.7e-05	1.42	0.033	1.73	0.044	1.34	0.006	1.19	0.25	1.29	0.0078	-1.02	0.99	1.22	0.34	1.54	0.047	1.01	0.86
CXCL10	2.62802e-18	**	4q21	no	yes	3.11	5.1e-06	1.84	1.4e-05	1.09	0.57	-1.01	0.97	3.83	5.8e-12	-1.98	0.027	1.35	0.44	-1.34	0.39	1.37	0.069	1.97	1.2e-05	1.37	0.11	1.49	0.19	1.39	0.38	1.7	0.6	1.39	0.2	1.34	0.51	1.88	0.012	1.48	0.45	-1.55	0.54	1.7	0.029	1.4	0.18
CXCL11	2.64675e-15	**	4q21.2	no	yes	2.85	0.00011	1.62	0.00082	1.05	0.79	-1.35	0.53	4.93	1.8e-13	-2.29	0.022	1.25	0.49	-1.18	0.6	1.31	0.13	1.82	0.00072	1.35	0.15	1.67	0.11	1.56	0.23	1.41	0.66	1.3	0.33	-1.07	0.89	1.76	0.024	3.26	0.24	-1.68	0.38	1.76	0.035	1.31	0.24
CXCR2P1	8.1423e-16	**	2q35	no	no	2.01	0.00062	1.69	0.00097	1.09	0.57	1.93	0.11	2.55	1.6e-08	-2.15	0.058	-1.09	0.7	-1.42	0.23	1.36	0.11	2.01	3.7e-05	1.83	0.0017	1.06	0.85	1.81	0.11	1.94	0.16	1.72	0.095	1.01	0.98	1.83	0.015	-3.39	0.13	-1.08	0.73	2.34	0.00035	1.1	0.43
DEPDC1	8.16099e-21	**	1p31.2	no	no	1.46	2e-05	1.58	5.6e-06	-1.08	0.25	1.85	0.004	1.02	0.68	1.25	0.54	4.84	0.00012	1.38	0.16	1.34	0.03	1.12	0.037	1.26	0.016	1.23	0.33	2.01	4.8e-07	1.85	0.35	1.75	0.00023	-1.36	0.038	-1.08	0.17	7.29	0.069	2.03	0.0062	1.32	0.19	1.2	0.044
DMRT3	3.24483e-09	**	9p24.3	no	no	1.44	0.01	1.6	1.4e-06	1.15	0.24	2.19	0.04	-1.17	0.29	1.33	0.44	1.61	0.27	1.1	0.47	1.3	0.19	2.28	0.00023	1.55	0.024	-1.18	0.31	4.36	0.00087	1.12	0.78	1.48	0.13	2.88	0.032	1.28	0.31	1.97	0.55	1.56	0.62	1.37	0.094	1	0.94
ERMP1	6.37312e-71	**	9p24	no	no	1.24	0.039	1.31	9.9e-06	1.42	7.9e-16	1.09	0.23	1.58	7.5e-08	1.62	0.0063	1.08	0.39	1.4	0.0029	1.94	1e-11	2.01	3.6e-15	1.66	1.4e-16	1.81	7.6e-06	1.56	2.5e-05	1.51	0.22	1.4	0.00077	1.24	0.38	1.28	0.024	2.18	0.37	-1.23	0.41	1.12	0.18	1.87	6.5e-07
FAM72A	1.58436e-23	**	1q32.1	no	no	1.34	0.0019	1.72	2.3e-09	-1.05	0.43	1.61	0.0092	1.14	0.054	1.18	0.53	1.91	0.0044	1.07	0.75	1.29	0.017	1.24	0.0016	1.07	0.53	-1.08	0.64	1.76	0.0028	1.16	0.77	1.51	0.00081	1.16	2.7e-06	1.15	0.12	5.95	0.046	-1.16	0.68	1.95	5.3e-06	1.2	0.0012
FAM72B	8.88607e-23	**	1p11.2	no	no	1.42	1.6e-05	1.67	2.7e-08	1.02	0.81	1.57	0.0041	1.15	0.012	1.12	0.68	2.11	0.0015	1.33	0.16	1.22	0.08	1.19	0.0079	1.14	0.13	-1.02	0.88	1.68	1.5e-05	1.55	0.41	1.69	1.2e-05	1.02	0.92	1.12	0.067	3.45	0.099	1.02	0.95	1.57	0.00046	1.24	0.00036
FAM72D	1.47065e-18	**	1q21.1	no	no	1.48	2.8e-05	1.59	1.3e-06	-1.05	0.41	1.63	0.014	1.08	0.17	1.21	0.52	1.96	0.0068	1.43	0.085	1.21	0.14	1.21	0.007	1.1	0.3	-1.04	0.8	1.63	0.00013	1.64	0.37	1.76	1.7e-05	-1.06	0.61	1.04	0.57	3.5	0.071	1.24	0.55	1.68	0.00016	1.21	0.00069
FAM83D	4.24445e-18	**	20q11.23	yes	no	1.37	0.00024	1.62	3.5e-06	1.01	0.8	1.86	0.0061	1.04	0.54	1.13	0.66	3.71	1.5e-05	1.18	0.39	1.17	0.2	1.21	0.0074	1.19	0.037	1.75	0.00025	2.31	2.1e-08	2.46	0.3	1.3	0.06	-1.01	0.95	-1.02	0.84	5.26	0.16	-1.02	0.92	1.55	0.0027	1.02	0.86
FCGR3A	1.11864e-08	**	1q23	no	yes	1.84	0.0015	1.1	0.22	1.21	0.21	1.34	0.23	1.67	5.9e-06	-1.29	0.29	1.92	0.032	-1.06	0.84	1.13	0.33	1.32	0.015	1.21	0.12	1.03	0.93	1.03	0.92	1.32	0.7	1.56	0.047	-1.34	0.36	1.66	0.0021	-1.59	0.14	-1.31	0.7	1.68	0.00024	1.1	0.55
GBP1P1	3.37875e-15	**	1p22.2	no	no	1.71	0.00047	1.63	0.0002	1.06	0.68	1.24	0.44	1.75	1.2e-07	-2.48	0.011	1.39	0.28	1.04	0.87	1.08	0.61	1.62	1.9e-07	1.37	0.019	1.18	0.54	1.44	0.18	1.6	0.37	1.1	0.7	1.49	0.2	1.63	0.0072	2.69	0.034	-1.21	0.61	1.64	0.0052	-1	0.99
GBP4	1.0624e-09	**	1p22.2	no	no	1.76	4.1e-05	1.26	0.032	-1.02	0.86	-1	0.99	1.88	1e-06	-2.04	0.02	1.24	0.33	-1.28	0.19	1.07	0.6	1.54	5.3e-05	1.23	0.15	1.21	0.48	1.12	0.59	1.02	0.96	1.12	0.59	1.05	0.89	1.5	0.02	1.77	0.019	-1.03	0.87	1.5	0.013	-1.03	0.87
GBP5	3.39302e-18	**	1p22.2	no	yes	2.52	7.2e-05	1.63	0.00046	1.03	0.85	1.87	0.058	3.05	1.2e-11	-1.83	0.058	2.2	0.027	-1.3	0.41	1.24	0.18	1.61	6.1e-05	1.24	0.19	1.18	0.61	1.26	0.46	1.31	0.72	1.76	0.031	1.03	0.95	1.7	0.012	-1.21	0.41	-1.47	0.42	2.24	0.0002	1.33	0.14
GLDC	6.3625e-20	**	9p22	no	no	1.41	0.21	3.17	1.2e-08	1.3	0.19	1.08	0.66	2.81	1e-07	-2.34	0.19	1.32	0.02	1.21	0.56	1.56	0.035	1.69	0.0055	2.03	0.00018	1.2	0.56	6.08	2.3e-05	-1.04	0.91	1.73	0.0072	5.94	0.14	1.83	0.059	-3.14	0.4	1.34	0.61	-1.48	0.23	2.05	0.00061
GLIS3	1.89988e-14	**	9p24.2	no	no	1.99	2.4e-07	1.08	0.36	1.12	0.39	1.82	0.0023	-1.2	0.089	-1.31	0.34	2.7	1.8e-05	1.86	0.046	1.61	1.8e-05	1.11	0.34	1.53	0.00039	1.06	0.83	-1.02	0.95	1.23	0.34	1.97	0.001	1.45	0.25	1.21	0.31	-2.43	0.52	1.8	0.48	1.35	0.056	-1.06	0.58
GTSE1	5.22465e-17	**	22q13.2-q13.3	yes	no	1.21	0.016	1.58	1.5e-07	-1.02	0.66	1.45	0.039	1.09	0.11	1.34	0.36	2.8	0.0015	1.21	0.48	1.35	0.012	1.04	0.48	1.27	0.0064	1.32	0.038	1.7	0.00027	1.87	0.22	1.52	0.00057	1.03	0.87	-1.06	0.32	4.3	0.039	2.49	0.024	1.68	0.00038	1.24	0.038
HAUS6	3.86416e-116	**	9p22.1	yes	no	1.9	1.6e-17	1.59	2e-19	1.29	4.3e-09	1.29	0.055	1.68	9.6e-18	1.24	0.066	1.48	0.00073	1.55	0.00062	1.55	1.1e-09	1.68	8.8e-19	1.71	4.7e-16	1.61	0.0017	2.21	1.4e-09	1.75	0.019	1.44	2.7e-07	1.24	0.44	1.32	3.4e-06	2.17	0.22	1.24	0.3	1.33	3.7e-05	1.46	4.7e-05
IDO1	1.73582e-10	**	8p12-p11	no	yes	1.99	0.0098	2.06	3.7e-05	-1.04	0.82	1.03	0.93	2.87	5.4e-09	-2.24	0.04	1.13	0.66	1.05	0.87	1.24	0.25	1.48	0.0093	1.25	0.28	1.35	0.46	1.07	0.84	2.82	0.21	1.34	0.34	-1.03	0.97	1.7	0.04	1.5	0.6	1.79	0.01	1.74	0.0077	1.39	0.23
IFI44L	2.2565e-12	**	1p31.1	no	yes	1.62	0.01	1.37	0.0053	1.22	0.23	1.05	0.88	2.27	4.8e-08	-1.47	0.14	1.75	0.0053	-1.36	0.18	1.05	0.77	1.55	0.00094	1.52	0.0015	1.05	0.86	2.43	0.01	-1.91	0.5	1.13	0.55	1.02	0.89	1.47	0.063	1.53	0.55	-1.31	0.34	2.02	0.0094	-1.37	0.031
IFNG	2.1189e-16	**	12q14	yes	yes	2.24	3.6e-05	1.58	0.00063	-1.03	0.79	1.48	0.083	2.39	8e-10	-1.72	0.1	1.19	0.083	1.03	0.89	1.25	0.24	1.9	1.1e-05	1.32	0.045	1.06	0.83	-1.51	0.14	1.46	0.27	1.42	0.14	-1.59	0.15	1.77	0.0043	-1.01	0.97	1.02	0.95	1.55	0.0084	1.16	0.086
JAK2	2.38973e-70	**	9p24	no	yes	2.01	3.6e-14	1.27	2.4e-05	1.25	0.00038	1.34	0.014	2.09	7.1e-19	1.19	0.15	1.45	0.00027	1.47	0.0083	1.37	7.6e-05	1.84	3.7e-14	1.57	4.4e-12	1.97	0.00026	1.17	0.28	1.29	0.23	1.44	0.00042	1.2	0.4	1.88	4.9e-07	1.31	0.45	-1.17	0.48	1.41	0.00017	1.44	0.0061
KANK1	1.1223e-42	**	9p24.3	no	no	1.2	0.06	1.76	2.3e-17	1.5	4.2e-09	1.25	0.21	1.56	8.8e-06	1.47	0.16	1.11	0.37	1.61	0.0003	1.43	1.8e-05	1.18	0.13	1.7	4.7e-12	1.4	0.04	1.5	0.004	1.45	0.18	1.08	0.69	1.05	0.86	1.33	0.02	1.67	0.093	1.58	0.32	1.08	0.3	1.55	5.6e-06
KDM4C	2.89944e-156	**	9p24.1	no	no	1.55	1.5e-19	1.51	2.4e-25	1.4	3.5e-25	1.53	0.00029	1.73	6e-22	1.21	0.0041	1.29	0.0019	1.52	1.2e-05	1.51	4.3e-12	1.85	2.2e-25	1.61	2.5e-16	1.42	0.00017	1.45	3.4e-05	1.31	0.097	1.61	3.8e-09	1.19	0.094	1.57	7.2e-08	1.39	0.44	1.46	0.13	1.26	0.00073	1.43	3.5e-06
KIAA2026	5.9242e-120	**	9p24.1	no	no	1.55	1.6e-12	1.39	1.9e-17	1.41	8.1e-15	1.36	0.01	1.8	6.5e-17	1.09	0.37	1.17	0.032	1.64	0.00026	1.52	5.8e-13	1.83	3.5e-23	1.62	7.3e-17	1.58	2e-05	1.53	0.0013	1.28	0.087	1.68	7.2e-10	1.34	0.11	1.53	3.3e-06	1.99	0.12	1.16	0.29	1.33	5.6e-05	1.42	2.2e-05
KIF18B	1.17737e-19	**	17q21.31	yes	no	1.34	0.00029	1.61	1.5e-06	-1.03	0.64	1.39	0.034	1.16	0.0047	1.22	0.61	2.46	0.007	1.45	0.17	1.44	0.0039	1.25	0.0023	1.19	0.039	1.25	0.075	1.73	0.00012	1.61	0.4	1.52	0.0019	-1.48	0.16	-1.02	0.75	6.05	0.091	1.05	0.84	1.76	0.00078	1.53	0.00022
KIF24	1.39212e-70	**	9p13.3	no	no	1.8	4.6e-13	1.44	1.1e-12	1.45	3.3e-11	1.76	2.5e-06	1.48	1.4e-08	1.31	0.075	2.24	0.001	1.43	0.052	1.51	2.6e-05	1.59	1.9e-09	1.51	3.5e-07	1.57	0.00028	1.36	0.029	2.49	0.0011	1.63	1.8e-05	1.37	0.36	1.15	0.03	1.45	0.21	1.63	0.28	1.59	0.00012	1.43	4.8e-06
KIF2C	7.52137e-21	**	1p34.1	yes	yes	1.31	0.00028	1.64	4.9e-07	-1.05	0.41	1.46	0.02	1.13	0.021	1.33	0.4	3.47	0.00046	1.39	0.22	1.39	0.0037	1.01	0.82	1.23	0.015	1.22	0.12	1.72	4.4e-05	1.81	0.26	1.71	0.00045	1.08	0.57	-1.06	0.32	4.33	0.1	1.93	0.0038	1.53	0.001	1.4	0.002
KIR2DL4	3.52264e-12	**	19q13.4	no	no	1.98	4e-05	1.56	4.2e-05	-1.06	0.62	1.13	0.52	1.83	5.3e-07	-1.19	0.47	1.05	0.72	-1.19	0.33	1.54	0.0058	1.8	1.1e-05	1.02	0.89	-1.01	0.98	1.14	0.65	2.19	0.022	1.36	0.062	1.5	0.37	1.24	0.25	-1.13	0.73	-1.02	0.94	1.55	0.01	1	1
MELK	7.4595e-86	**	9p13.2	yes	yes	2	5.4e-13	2.22	1.7e-14	1.33	2.4e-06	1.94	0.00092	1.71	5.6e-21	1.62	0.12	4.92	8.5e-05	1.74	0.016	1.75	1.8e-05	1.61	5.1e-11	1.58	1.9e-07	1.78	0.00018	1.88	7.7e-06	2.08	0.26	1.88	3.9e-06	-1.3	0.55	1.24	0.00018	5.31	0.087	3.06	0.011	2.13	5e-06	1.69	2.6e-05
MTFR2	1.71289e-22	**	6q23.3	no	no	1.26	0.0034	1.64	1.5e-08	-1.01	0.92	1.42	0.054	1.13	0.019	1.2	0.49	2.01	0.004	1.44	0.13	1.25	0.026	1.17	0.0045	1.17	0.068	1.22	0.22	1.64	0.0019	1.97	0.0089	1.9	1.9e-07	-1.38	0.18	1	0.96	2.47	0.16	2.11	0.14	1.66	2e-05	1.34	0.0061
MYBL2	5.68581e-14	**	20q13.1	yes	no	1.59	1.3e-05	1.75	3.2e-06	1.07	0.35	1.15	0.48	1.02	0.73	1.24	0.52	3.42	0.0011	1.35	0.37	1.55	0.001	1.08	0.19	1.2	0.071	1.26	0.1	1.83	0.00055	1.38	0.62	1.56	0.0028	-1.21	0.52	-1.02	0.8	5.42	0.06	1.66	0.22	1.68	0.0025	1.22	0.18
NEIL3	4.02254e-15	**	4q34.3	no	no	1.54	0.0002	1.27	0.0076	-1.02	0.73	1.51	0.012	1.16	0.016	1.4	0.36	3.37	0.00041	1.35	0.17	1.25	0.17	1.29	0.0011	1.17	0.12	1.38	0.035	1.67	0.0011	1.7	0.31	1.61	0.0002	-1.23	0.13	-1.15	0.23	-1.11	0.86	1.36	0.091	1.79	0.00022	1.03	0.66
NFIB	3.6237e-49	**	9p24.1	no	no	1.79	1.3e-07	2.18	6.9e-14	1.34	7.6e-07	1.26	0.096	1.55	1.5e-08	-1.37	0.12	1.48	0.00057	1.41	0.003	1.6	2.8e-06	1.52	6.8e-08	1.8	4.4e-13	1.5	0.022	1.5	0.16	1.14	0.57	1.31	0.064	-1.05	0.81	1.65	0.0011	-1.34	0.49	1.01	0.97	-1.02	0.84	-1.17	0.19
NUF2	4.55899e-22	**	1q23.3	yes	no	1.34	0.00098	1.8	3.6e-10	1.01	0.89	1.59	0.025	1.06	0.3	1.06	0.88	2.97	0.0016	1.6	0.036	1.35	0.01	1.23	0.0012	1.23	0.021	1.27	0.26	1.89	2.2e-06	1.35	0.56	1.54	0.0018	-1.21	0.66	1.03	0.61	6.9	0.063	1.7	0.21	1.75	0.0013	1.47	0.00092
PDCD1LG2	1.84192e-31	**	9p24.2	no	yes	2.61	2.8e-06	1.29	0.002	1.08	0.59	1.65	0.1	2.5	1.2e-14	1.01	0.98	2.51	0.004	-1.03	0.91	1.23	0.12	2.28	3.8e-13	1.33	0.034	1.53	0.12	1.2	0.51	1.65	0.5	2.23	0.00013	1.35	0.3	1.98	9e-05	1.13	0.87	-1.33	0.13	1.62	0.002	1.03	0.79
PLGRKT	5.19062e-132	**	9p24.1	no	no	2.22	1.6e-22	1.34	1.4e-09	1.33	1.2e-09	1.65	0.00012	2.2	3e-27	1.67	3.4e-05	1.48	1.9e-06	1.55	0.00039	1.62	4e-09	2.22	5.5e-27	1.72	1.6e-16	2.02	1e-05	1.42	0.0058	1.6	0.013	1.69	6.4e-07	1.02	0.9	1.79	6.6e-09	1.03	0.96	-1.08	0.78	1.18	0.11	1.65	1.6e-06
PLK1	4.57806e-19	**	16p12.2	yes	no	1.41	0.00012	1.55	9.3e-07	-1.05	0.37	1.43	0.096	1.16	0.0021	1.29	0.44	2.03	0.0048	1.26	0.36	1.22	0.07	1.13	0.015	1.19	0.028	1.16	0.2	1.77	9.5e-05	1.61	0.23	1.66	0.00025	-1.48	0.013	-1.01	0.9	3.27	0.04	1.3	0.28	1.67	0.00055	1.29	0.047
PLPP6	9.45423e-119	**	9p24.1	no	no	1.6	1.7e-14	1.21	1.8e-06	1.51	9.2e-18	1.43	0.001	1.79	2.7e-20	1.6	8.5e-06	1.33	0.0023	1.68	4.8e-06	1.75	3.9e-16	1.88	3.3e-16	1.74	8.6e-21	1.75	0.00019	1.43	0.00029	1.08	0.67	1.45	7.6e-06	1.3	0.13	1.62	6.4e-08	1.81	0.23	1.2	0.38	-1.08	0.31	1.54	7e-06
PSIP1	2.22481e-86	**	9p22.3	no	no	2.03	3.8e-17	1.66	6.9e-14	1.26	3.2e-07	1.35	0.016	1.53	7e-09	1.07	0.6	1.36	0.004	1.68	0.0015	1.48	9e-07	1.84	3.8e-15	1.78	8.8e-19	1.65	0.0012	1.84	1.5e-06	1.91	0.018	1.35	0.0021	1.14	0.24	1.46	1.9e-05	1.73	0.1	1.17	0.4	1.25	0.0019	1.33	0.00063
PUM3	2.16826e-151	**	9p24.2	no	no	1.95	8.7e-27	2.1	8.8e-33	1.39	2.6e-13	1.71	0.00023	2.04	1.5e-25	1.64	0.0041	1.59	0.00067	1.72	0.00011	1.59	7.4e-10	1.81	3.5e-12	1.69	3.5e-19	1.8	2.3e-05	1.6	3.4e-06	1.54	0.029	1.58	1.1e-07	1.08	0.42	1.53	4.2e-07	2.21	0.12	1.34	0.016	1.23	0.00069	1.71	1.2e-06
RANBP6	2.52707e-147	**	9p24.1	no	no	1.74	3.8e-20	1.33	2.2e-14	1.51	2.3e-16	1.5	2.1e-07	1.91	9.8e-22	1.3	0.008	1.3	0.0015	1.63	0.00014	1.62	4e-13	1.93	7.1e-32	1.66	6.1e-21	1.62	1.9e-05	1.29	0.0087	1.26	0.11	1.62	1e-07	1.18	0.21	1.6	9.4e-07	1.36	0.17	1.07	0.66	1.25	0.00017	1.64	3.1e-06
RCL1	3.55241e-192	**	9p24.1-p23	no	no	2.02	4.7e-29	1.74	3.3e-33	1.38	3.4e-16	1.55	4.3e-09	2.14	1.3e-31	1.78	0.00029	1.45	0.00015	1.47	0.02	1.66	5.5e-13	2.04	3e-26	1.66	1.2e-18	2.14	1.2e-06	1.91	7.1e-10	1.4	0.058	1.62	8.8e-09	1.07	0.57	1.86	3.3e-11	1.62	0.21	-1.08	0.63	1.35	5.7e-05	1.67	1.1e-07
RFX3	2.24515e-51	**	9p24.2	no	no	1.75	4.3e-10	1.55	3.7e-09	1.28	3.1e-05	1.62	0.0024	1.51	1.7e-07	1.08	0.56	1.94	0.0031	2.05	3.5e-05	1.37	0.0058	1.64	2e-07	1.8	1.8e-14	1.95	0.00026	1.31	0.11	1.43	0.41	1.52	5.8e-05	1.32	0.2	1.14	0.25	2.11	0.38	1.95	0.13	1.12	0.48	1.32	0.00023
RIC1	1.04032e-147	**	9p24.1	no	no	1.77	3.1e-19	1.37	2.1e-14	1.33	2.7e-13	1.44	6e-05	1.94	2.8e-21	1.26	0.0042	1.38	0.00083	1.74	5.7e-05	1.52	4.9e-11	2	2.5e-31	1.63	1.6e-21	1.56	2.4e-05	1.51	0.00032	1.25	0.34	1.78	1.1e-10	1.17	0.2	1.71	3.4e-09	1.8	0.34	1.23	0.21	1.36	5e-07	1.38	1.2e-05
SPC24	2.05971e-15	**	19p13.2	yes	no	1.56	1.5e-06	1.37	0.00079	1.1	0.21	1.05	0.84	1.14	0.042	1.16	0.57	3.09	0.0011	1.31	0.28	1.32	0.016	1.34	0.00022	1.12	0.26	1.23	0.13	1.61	0.014	1.55	0.41	1.55	0.0046	-1.82	0.052	1.01	0.93	3.53	0.028	1.45	0.38	1.56	0.0016	1.22	0.01
TMEM261	9.3275e-128	**	9p24.1	no	no	1.75	3e-20	1.62	3.6e-26	1.51	4.1e-13	1.44	0.0017	1.98	2.1e-27	1.65	0.0001	1.24	0.00067	1.23	0.27	1.6	3.6e-09	1.89	2.6e-20	1.62	1.1e-11	1.41	0.0003	1.58	0.00099	1.45	0.024	1.47	1.4e-06	1.1	0.41	1.65	1.3e-06	-1.04	0.7	1.04	0.76	1.15	0.015	1.5	8.1e-05
TOMM5	3.09223e-79	**	9p13.2	no	no	1.52	2.6e-12	1.62	3.3e-22	1.38	4.4e-11	1.48	0.00042	1.54	2e-14	1.64	9e-05	1.32	0.00021	1.31	0.011	1.33	2.2e-06	1.47	1.7e-08	1.26	9e-05	1.51	5.4e-05	1.26	0.043	1.51	0.0088	1.2	0.025	1.12	0.51	1.27	2.5e-05	1.28	0.23	1.24	0.2	1.1	0.066	1.38	0.00019
TPX2	1.19779e-27	**	20q11.2	yes	no	1.54	8.7e-07	1.62	2.4e-08	-1.03	0.65	1.34	0.065	1.11	0.042	1.4	0.3	2.92	0.00045	1.36	0.11	1.43	0.0025	1.16	0.0074	1.2	0.027	1.38	0.0063	1.83	2.5e-07	2.02	0.21	1.6	9.6e-05	-1.23	0.4	1	0.99	5.55	0.072	1.58	0.098	1.69	0.00022	1.53	0.0029
TROAP	2.1562e-19	**	12q13.12	no	no	1.25	0.0056	1.59	1.6e-06	1.02	0.78	1.29	0.095	1.09	0.14	1.31	0.44	3.41	0.0015	1.35	0.29	1.44	0.004	1.21	0.0014	1.15	0.15	1.23	0.054	1.65	1.2e-06	1.82	0.21	1.51	0.0025	1.04	0.79	1.04	0.46	5.68	0.047	2.11	0.11	1.98	8.1e-05	1.37	0.0034
TTC39B	1.79916e-59	**	9p22.3	no	no	1.62	4.5e-06	1.44	7.7e-07	1.44	1.1e-09	1.85	0.001	1.61	8.2e-10	1.93	0.0016	1.58	0.051	1.03	0.89	1.53	6.3e-05	1.99	2.5e-13	1.59	4.8e-07	1.36	0.13	1.88	0.0032	1.23	0.46	1.24	0.088	-1.01	0.96	1.28	0.02	1.58	6.1e-16	-1.35	0.24	1.63	0.0011	1.17	0.047
TTK	4.66602e-26	**	6q14.1	yes	no	1.4	0.00011	1.81	2e-10	1.01	0.85	1.52	0.026	1.08	0.12	1.51	0.16	3.77	0.00087	1.67	0.026	1.44	0.0035	1.12	0.054	1.22	0.015	1.4	0.065	2.05	4.3e-08	1.91	0.25	1.74	0.00015	-1.75	0.17	-1.07	0.24	6.73	0.062	2.4	0.094	1.73	0.0074	1.35	0.012
UHRF2	4.23952e-168	**	9p24.1	yes	no	1.77	2e-22	1.58	7.8e-27	1.44	5.6e-21	1.44	6.3e-05	1.97	3.7e-25	1.31	0.048	1.37	0.00094	1.66	1.1e-05	1.65	1.7e-09	1.93	8.6e-32	1.7	6.8e-21	1.64	8.6e-05	1.65	7.8e-08	1.31	0.092	1.76	5.2e-08	-1.03	0.89	1.58	3.1e-08	1.58	0.49	1.52	0.1	1.2	0.036	1.48	2.7e-07
VLDLR.AS1	2.77249e-25	**	9p24.2	no	no	1.12	0.38	2.66	1.6e-19	1.19	0.065	1.79	0.0012	1.19	0.041	2.17	0.011	1.18	0.39	1.28	0.4	1.18	0.17	2.36	6.5e-08	1.62	3.8e-05	1.51	0.041	1.21	0.31	1.44	0.43	1.21	0.32	2.07	0.13	1.22	0.2	1.32	0.77	3.25	0.062	1.13	0.32	1.06	0.12
