# Supplementary material for: Chromosome 9p copy number gains involving PD-L1 are associated with a specific proliferation and immune-modulating gene expression program active across major cancer types
Source: BMC Med Genomics. 2017 Dec 6;10:74. doi: 10.1186/s12920-017-0308-8 (PMC5719741; doi:10.1186/s12920-017-0308-8)
Supplement: Supplementary file 2 — Enrichment analysis of GO categories in the 75-gene list. (XLSX 240 kb) [file 12920_2017_308_MOESM2_ESM.xlsx]

## Sheet: sig_suppl_tab_1_msigdb_v5.2_C5
GO category	#genes in category	#genes in category and gene list	p (Fisher's exact test)	genes
GO_MITOTIC_CELL_CYCLE	735	19	8.74291e-12	ASPM, CDC20, CDCA8, CDKN2A, CENPA, CENPF, CLSPN, FAM83D, GTSE1, HAUS6, KIF18B, KIF2C, MELK, MYBL2, NUF2, PLK1, SPC24, TPX2, TTK
GO_CELL_CYCLE_PROCESS	1025	21	4.20027e-11	ASPM, CDC20, CDCA8, CDKN2A, CENPA, CENPF, CENPI, CLSPN, FAM83D, GTSE1, HAUS6, IFNG, KIF18B, KIF2C, MELK, MYBL2, NUF2, PLK1, SPC24, TPX2, TTK
GO_CHROMOSOME_SEGREGATION	258	12	1.51493e-10	CDC20, CDCA8, CENPA, CENPF, CENPI, FAM83D, KIF18B, KIF2C, NUF2, PLK1, SPC24, TTK
GO_SISTER_CHROMATID_COHESION	106	9	1.79631e-10	CDC20, CDCA8, CENPA, CENPF, CENPI, KIF2C, NUF2, PLK1, SPC24
GO_CELL_CYCLE	1253	22	2.45005e-10	ASPM, CDC20, CDCA8, CDKN2A, CENPA, CENPF, CENPI, CLSPN, FAM83D, GTSE1, HAUS6, IFNG, KIF18B, KIF2C, MELK, MYBL2, NUF2, PLK1, SPC24, TPX2, TTK, UHRF2
GO_NUCLEAR_CHROMOSOME_SEGREGATION	215	11	3.48816e-10	CDC20, CDCA8, CENPA, CENPF, CENPI, FAM83D, KIF18B, KIF2C, NUF2, PLK1, SPC24
GO_MITOTIC_NUCLEAR_DIVISION	348	13	3.5706e-10	ASPM, CDC20, CDCA8, CENPF, FAM83D, HAUS6, KIF18B, KIF2C, MYBL2, NUF2, PLK1, SPC24, TPX2
GO_SISTER_CHROMATID_SEGREGATION	169	10	5.79798e-10	CDC20, CDCA8, CENPA, CENPF, CENPI, KIF18B, KIF2C, NUF2, PLK1, SPC24
GO_CELL_DIVISION	446	13	7.22037e-09	ASPM, CDC20, CDCA8, CDKN2A, CENPF, FAM83D, HAUS6, KIF18B, KIF2C, NUF2, PLK1, SPC24, TPX2
GO_ORGANELLE_FISSION	469	13	1.31447e-08	ASPM, CDC20, CDCA8, CENPF, FAM83D, HAUS6, KIF18B, KIF2C, MYBL2, NUF2, PLK1, SPC24, TPX2
GO_MICROTUBULE_BASED_PROCESS	487	13	2.05379e-08	ASPM, CENPA, CNTLN, GTSE1, HAUS6, KIF18B, KIF24, KIF2C, MYBL2, PLK1, RFX3, TPX2, TTK
GO_MICROTUBULE_CYTOSKELETON_ORGANIZATION	323	11	2.47455e-08	ASPM, CENPA, CNTLN, HAUS6, KIF18B, KIF24, KIF2C, MYBL2, PLK1, TPX2, TTK
GO_SPINDLE	276	10	6.42695e-08	ASPM, CDC20, CDCA8, CENPF, FAM83D, HAUS6, KIF18B, PLK1, TPX2, TTK
GO_CHROMOSOME_CENTROMERIC_REGION	163	8	1.49097e-07	CDCA8, CENPA, CENPF, CENPI, KIF2C, NUF2, PLK1, SPC24
GO_KINETOCHORE	112	7	1.82932e-07	CENPA, CENPF, CENPI, KIF2C, NUF2, PLK1, SPC24
GO_CONDENSED_CHROMOSOME_CENTROMERIC_REGION	92	6	1.13801e-06	CENPA, CENPF, KIF2C, NUF2, PLK1, SPC24
GO_CHROMOSOME	835	14	1.63865e-06	CDCA8, CDKN2A, CENPA, CENPF, CENPI, KDM4C, KIF2C, MYBL2, NUF2, PLK1, PSIP1, RFX3, SPC24, UHRF2
GO_REGULATION_OF_CELL_CYCLE_G2_M_PHASE_TRANSITION	58	5	2.36349e-06	CDKN2A, CENPF, CLSPN, GTSE1, PLK1
GO_NEGATIVE_REGULATION_OF_LEUKOCYTE_PROLIFERATION	63	5	3.57445e-06	CCL8, CD274, CDKN2A, IDO1, PDCD1LG2
GO_SPINDLE_POLE	116	6	4.42046e-06	ASPM, CDC20, CENPF, FAM83D, PLK1, TPX2
GO_MICROTUBULE_DEPOLYMERIZATION	12	3	1.05107e-05	KIF18B, KIF24, KIF2C
GO_NEGATIVE_REGULATION_OF_CELL_ADHESION	212	7	1.30827e-05	ADAMDEC1, CD274, CDKN2A, IDO1, JAK2, KANK1, PDCD1LG2
GO_MICROTUBULE_CYTOSKELETON	1003	14	1.36539e-05	ASPM, CDC20, CDCA8, CENPF, CNTLN, FAM83D, GTSE1, HAUS6, KIF18B, KIF24, KIF2C, PLK1, TPX2, TTK
GO_METAPHASE_PLATE_CONGRESSION	41	4	1.57941e-05	CDCA8, CENPF, FAM83D, KIF2C
GO_REGULATION_OF_CELL_CYCLE_PHASE_TRANSITION	312	8	1.90351e-05	CDC20, CDKN2A, CENPF, CLSPN, FAM83D, GTSE1, PLK1, TTK
GO_CHROMOSOMAL_REGION	312	8	1.90351e-05	CDCA8, CENPA, CENPF, CENPI, KIF2C, NUF2, PLK1, SPC24
GO_REGULATION_OF_CELL_CYCLE	908	13	2.25975e-05	ASPM, CDC20, CDKN2A, CENPF, CLSPN, FAM83D, GTSE1, IFNG, MYBL2, PLK1, TPX2, TTK, UHRF2
GO_REGULATION_OF_CELL_CYCLE_PROCESS	535	10	2.49291e-05	CDC20, CDKN2A, CENPF, CLSPN, FAM83D, GTSE1, PLK1, TPX2, TTK, UHRF2
GO_NEGATIVE_REGULATION_OF_T_CELL_PROLIFERATION	46	4	2.51e-05	CD274, CDKN2A, IDO1, PDCD1LG2
GO_CHEMOKINE_ACTIVITY	46	4	2.51e-05	CCL4, CCL8, CXCL10, CXCL11
GO_NEGATIVE_REGULATION_OF_INTERLEUKIN_10_PRODUCTION	16	3	2.64726e-05	CD274, IDO1, PDCD1LG2
GO_POSITIVE_REGULATION_OF_RESPONSE_TO_WOUNDING	159	6	2.68642e-05	CCL4, CCL8, GBP5, IDO1, JAK2, KANK1
GO_CYTOSKELETON_ORGANIZATION	800	12	3.13208e-05	ASPM, CENPA, CNTLN, HAUS6, JAK2, KIF18B, KIF24, KIF2C, MYBL2, PLK1, TPX2, TTK
GO_REGULATION_OF_MICROTUBULE_POLYMERIZATION_OR_DEPOLYMERIZATION	168	6	3.66175e-05	ASPM, HAUS6, MYBL2, PLK1, TPX2, TTK
GO_CELLULAR_RESPONSE_TO_INTERFERON_GAMMA	102	5	3.79217e-05	CCL4, CCL8, GBP5, IFNG, JAK2
GO_CHROMOSOME_ORGANIZATION	959	13	4.00322e-05	CDC20, CDCA8, CDKN2A, CENPA, CENPF, CENPI, JAK2, KDM4C, KIF18B, KIF2C, NUF2, PLK1, SPC24
GO_CHEMOKINE_RECEPTOR_BINDING	55	4	5.11667e-05	CCL4, CCL8, CXCL10, CXCL11
GO_CONDENSED_CHROMOSOME	181	6	5.55353e-05	CENPA, CENPF, KIF2C, NUF2, PLK1, SPC24
GO_POSITIVE_REGULATION_OF_INFLAMMATORY_RESPONSE	112	5	5.93719e-05	CCL4, CCL8, GBP5, IDO1, JAK2
GO_LEUKOCYTE_CHEMOTAXIS	113	5	6.19448e-05	CCL4, CCL8, CXCL10, CXCL11, IFNG
GO_MICROTUBULE_END	21	3	6.20456e-05	ASPM, KIF18B, KIF2C
GO_NEGATIVE_REGULATION_OF_CELL_DIVISION	58	4	6.31243e-05	ASPM, CENPF, PLK1, TTK
GO_CHROMOSOME_LOCALIZATION	58	4	6.31243e-05	CDCA8, CENPF, FAM83D, KIF2C
GO_NEGATIVE_REGULATION_OF_ORGANELLE_ORGANIZATION	371	8	6.5131e-05	ASPM, CENPF, HAUS6, KANK1, MYBL2, PLK1, TPX2, TTK
GO_NEGATIVE_REGULATION_OF_CELLULAR_PROTEIN_CATABOLIC_PROCESS	60	4	7.21513e-05	CDKN2A, CENPF, PLK1, TTK
GO_REGULATION_OF_LEUKOCYTE_PROLIFERATION	194	6	8.15811e-05	CCL8, CD274, CDKN2A, IDO1, IFNG, PDCD1LG2
GO_MICROTUBULE	386	8	8.59036e-05	ASPM, GTSE1, HAUS6, KIF18B, KIF24, KIF2C, PLK1, TPX2
GO_RESPONSE_TO_INTERFERON_GAMMA	123	5	9.26919e-05	CCL4, CCL8, GBP5, IFNG, JAK2
GO_SPINDLE_CHECKPOINT	24	3	9.36747e-05	CENPF, PLK1, TTK
GO_PROTEIN_DEPOLYMERIZATION	24	3	9.36747e-05	KIF18B, KIF24, KIF2C
GO_POSITIVE_REGULATION_OF_RESPONSE_TO_EXTERNAL_STIMULUS	293	7	0.000102622	CCL4, CCL8, CXCL10, CXCL11, GBP5, IDO1, JAK2
GO_CHEMOKINE_MEDIATED_SIGNALING_PATHWAY	66	4	0.000104882	CCL4, CCL8, CXCL10, CXCL11
GO_POSITIVE_REGULATION_OF_PROTEIN_LOCALIZATION_TO_NUCLEUS	127	5	0.000107834	CDKN2A, GTSE1, JAK2, KANK1, PLK1
GO_NEGATIVE_REGULATION_OF_CELL_CELL_ADHESION	129	5	0.000116083	CD274, CDKN2A, IDO1, JAK2, PDCD1LG2
GO_REGULATION_OF_PROTEIN_COMPLEX_DISASSEMBLY	207	6	0.000116567	ASPM, HAUS6, MYBL2, PLK1, TPX2, TTK
GO_POSITIVE_REGULATION_OF_LOCOMOTION	405	8	0.000119857	CCL4, CCL8, CD274, CXCL10, CXCL11, GTSE1, IFNG, JAK2
GO_SPINDLE_ASSEMBLY	69	4	0.000124765	ASPM, HAUS6, MYBL2, TPX2
GO_NEGATIVE_REGULATION_OF_CYTOSKELETON_ORGANIZATION	211	6	0.000129443	ASPM, HAUS6, KANK1, MYBL2, TPX2, TTK
GO_MITOTIC_CELL_CYCLE_CHECKPOINT	133	5	0.000134028	CENPF, CLSPN, GTSE1, PLK1, TTK
GO_NEGATIVE_REGULATION_OF_CHROMOSOME_SEGREGATION	27	3	0.000134305	CENPF, PLK1, TTK
GO_REGULATION_OF_T_CELL_PROLIFERATION	136	5	0.000148826	CD274, CDKN2A, IDO1, IFNG, PDCD1LG2
GO_CHROMATIN	423	8	0.000161623	CDKN2A, CENPA, CENPF, KDM4C, PLK1, PSIP1, RFX3, UHRF2
GO_NEGATIVE_REGULATION_OF_CELL_CYCLE_PHASE_TRANSITION	140	5	0.000170467	CENPF, CLSPN, GTSE1, PLK1, TTK
GO_REGULATION_OF_CELL_PROLIFERATION	1432	15	0.000176797	APLN, ASPM, CCL8, CD274, CDC20, CDKN2A, CXCL10, CXCL11, IDO1, IFNG, JAK2, KDM4C, NFIB, PDCD1LG2, TTK
GO_MICROTUBULE_ASSOCIATED_COMPLEX	142	5	0.00018215	CDCA8, HAUS6, KIF18B, KIF24, KIF2C
GO_CYTOSKELETAL_PART	1280	14	0.000195267	ASPM, CDC20, CDCA8, CENPF, CNTLN, FAM83D, GTSE1, HAUS6, KIF18B, KIF24, KIF2C, PLK1, TPX2, TTK
GO_REGULATION_OF_MICROTUBULE_BASED_PROCESS	230	6	0.000206876	ASPM, HAUS6, MYBL2, PLK1, TPX2, TTK
GO_REGULATION_OF_CHROMOSOME_SEGREGATION	79	4	0.000210925	CENPF, KIF2C, PLK1, TTK
GO_NEGATIVE_REGULATION_OF_MITOTIC_NUCLEAR_DIVISION	33	3	0.000246576	CENPF, PLK1, TTK
GO_REGULATION_OF_MITOTIC_CELL_CYCLE	451	8	0.000249994	CDC20, CDKN2A, CENPF, CLSPN, GTSE1, PLK1, TPX2, TTK
GO_IMMUNE_RESPONSE	1004	12	0.000272549	ADAMDEC1, APLN, CCL4, CCL8, CD274, CXCL10, CXCL11, FCGR3A, GBP5, IFNG, JAK2, PDCD1LG2
GO_CELL_CHEMOTAXIS	158	5	0.000299069	CCL4, CCL8, CXCL10, CXCL11, IFNG
GO_ORGANELLE_ASSEMBLY	464	8	0.000302789	ASPM, CENPA, CENPF, HAUS6, KIF24, MYBL2, RFX3, TPX2
GO_MITOTIC_SISTER_CHROMATID_SEGREGATION	88	4	0.000319313	CDCA8, KIF18B, KIF2C, PLK1
GO_NEGATIVE_REGULATION_OF_PROTEIN_COMPLEX_DISASSEMBLY	161	5	0.000326176	ASPM, HAUS6, MYBL2, TPX2, TTK
GO_G_PROTEIN_COUPLED_RECEPTOR_BINDING	252	6	0.000337987	APLN, CCL4, CCL8, CXCL10, CXCL11, JAK2
GO_LYMPHOCYTE_CHEMOTAXIS	37	3	0.000347463	CCL8, CXCL10, CXCL11
GO_REGULATION_OF_CELL_DIVISION	261	6	0.000407432	ASPM, CDC20, CENPF, KIF18B, PLK1, TTK
GO_NEGATIVE_REGULATION_OF_HOMOTYPIC_CELL_CELL_ADHESION	94	4	0.000410712	CD274, CDKN2A, IDO1, PDCD1LG2
GO_MICROTUBULE_POLYMERIZATION_OR_DEPOLYMERIZATION	40	3	0.000438333	KIF18B, KIF24, KIF2C
GO_REGULATION_OF_ACTIVATED_T_CELL_PROLIFERATION	40	3	0.000438333	CD274, IDO1, PDCD1LG2
GO_CYTOKINE_RECEPTOR_BINDING	267	6	0.000459611	CCL4, CCL8, CXCL10, CXCL11, IFNG, JAK2
GO_MOVEMENT_OF_CELL_OR_SUBCELLULAR_COMPONENT	1226	13	0.000467079	ASPM, CCL4, CCL8, CXCL10, CXCL11, FAM83D, IFNG, JAK2, KIF18B, KIF24, KIF2C, NFIB, RFX3
GO_REGULATION_OF_MUSCLE_CELL_APOPTOTIC_PROCESS	41	3	0.000471691	CDKN2A, IFNG, JAK2
GO_REGULATION_OF_INTERLEUKIN_10_PRODUCTION	42	3	0.000506636	CD274, IDO1, PDCD1LG2
GO_REGULATION_OF_PROTEIN_CATABOLIC_PROCESS	382	7	0.000517205	CDC20, CDKN2A, CENPF, FAM83D, IFNG, PLK1, TTK
GO_POSITIVE_REGULATION_OF_CELL_PROLIFERATION	784	10	0.000572372	APLN, ASPM, CD274, CDC20, CXCL10, IFNG, JAK2, KDM4C, PDCD1LG2, TTK
GO_NEGATIVE_REGULATION_OF_PROTEIN_CATABOLIC_PROCESS	104	4	0.000602416	CDKN2A, CENPF, PLK1, TTK
GO_NEGATIVE_REGULATION_OF_NUCLEAR_DIVISION	45	3	0.000621295	CENPF, PLK1, TTK
GO_CENTROMERE_COMPLEX_ASSEMBLY	45	3	0.000621295	CENPA, CENPF, CENPI
GO_NEGATIVE_REGULATION_OF_MULTICELLULAR_ORGANISMAL_PROCESS	943	11	0.000624958	APLN, ASPM, CD274, CDKN2A, CXCL10, IDO1, IFNG, JAK2, KANK1, NFIB, PDCD1LG2
GO_CELL_CYCLE_CHECKPOINT	186	5	0.000630786	CENPF, CLSPN, GTSE1, PLK1, TTK
GO_NEGATIVE_REGULATION_OF_MITOTIC_CELL_CYCLE	188	5	0.000662072	CENPF, CLSPN, GTSE1, PLK1, TTK
GO_POSITIVE_REGULATION_OF_IMMUNE_SYSTEM_PROCESS	801	10	0.000676269	CCL4, CCL8, CD274, CXCL10, CXCL11, FCGR3A, GBP5, IDO1, IFNG, PDCD1LG2
GO_POSITIVE_REGULATION_OF_LEUKOCYTE_MIGRATION	108	4	0.000694404	CCL4, CCL8, CXCL10, CXCL11
GO_NEGATIVE_REGULATION_OF_CELLULAR_COMPONENT_ORGANIZATION	662	9	0.00070671	ASPM, CENPF, CXCL10, HAUS6, KANK1, MYBL2, PLK1, TPX2, TTK
GO_MICROTUBULE_BINDING	192	5	0.00072812	FAM83D, KIF18B, KIF24, KIF2C, PLK1
GO_KINETOCHORE_ORGANIZATION	11	2	0.000732586	CENPA, CENPF
GO_CONDENSED_CHROMOSOME_OUTER_KINETOCHORE	11	2	0.000732586	CENPF, PLK1
GO_PROTEIN_LOCALIZATION_TO_ORGANELLE	532	8	0.000748967	CENPA, CNTLN, FAM83D, IFNG, JAK2, PLK1, RANBP6, TOMM5
GO_LYMPHOCYTE_MIGRATION	48	3	0.000751319	CCL8, CXCL10, CXCL11
GO_PROTEIN_COMPLEX_SUBUNIT_ORGANIZATION	1461	14	0.000753486	ASPM, CENPA, CENPF, CENPI, GBP5, HAUS6, JAK2, KIF18B, KIF24, KIF2C, MYBL2, RANBP6, TPX2, TTK
GO_NEGATIVE_REGULATION_OF_CELL_CYCLE	410	7	0.00078586	CDKN2A, CENPF, CLSPN, GTSE1, IFNG, PLK1, TTK
GO_REGULATION_OF_IMMUNE_SYSTEM_PROCESS	1308	13	0.000861851	CCL4, CCL8, CD274, CDKN2A, CXCL10, CXCL11, FCGR3A, GBP5, IDO1, IFNG, JAK2, KIR2DL4, PDCD1LG2
GO_POSITIVE_REGULATION_OF_CAMP_MEDIATED_SIGNALING	12	2	0.000877001	CXCL10, CXCL11
GO_POSITIVE_REGULATION_OF_MUSCLE_CELL_APOPTOTIC_PROCESS	12	2	0.000877001	CDKN2A, IFNG
GO_CYTOPLASMIC_MICROTUBULE	51	3	0.000897487	GTSE1, KIF18B, KIF2C
GO_NEGATIVE_REGULATION_OF_CELL_CYCLE_PROCESS	204	5	0.000956048	CENPF, CLSPN, GTSE1, PLK1, TTK
GO_IMMUNE_SYSTEM_PROCESS	1862	16	0.000963988	ADAMDEC1, APLN, CCL4, CCL8, CD274, CXCL10, CXCL11, FCGR3A, GBP5, IDO1, IFI44L, IFNG, JAK2, KIF2C, MELK, PDCD1LG2
GO_NUCLEAR_PERIPHERY	118	4	0.000967281	CENPF, JAK2, PSIP1, RANBP6
GO_SUPRAMOLECULAR_FIBER	555	8	0.000985459	ASPM, GTSE1, HAUS6, KIF18B, KIF24, KIF2C, PLK1, TPX2
GO_POSITIVE_REGULATION_OF_PHOSPHATE_METABOLIC_PROCESS	1002	11	0.00103201	APLN, CCL4, CCL8, CLSPN, CXCL10, CXCL11, IFNG, JAK2, PLK1, TPX2, TTK
GO_POSITIVE_REGULATION_OF_PHOSPHORUS_METABOLIC_PROCESS	1002	11	0.00103201	APLN, CCL4, CCL8, CLSPN, CXCL10, CXCL11, IFNG, JAK2, PLK1, TPX2, TTK
GO_KINESIN_COMPLEX	54	3	0.00106055	KIF18B, KIF24, KIF2C
GO_CYTOKINE_ACTIVITY	213	5	0.00115906	CCL4, CCL8, CXCL10, CXCL11, IFNG
GO_REGULATION_OF_PROTEIN_LOCALIZATION_TO_NUCLEUS	214	5	0.00118344	CDKN2A, GTSE1, JAK2, KANK1, PLK1
GO_T_CELL_MIGRATION	14	2	0.00120342	CXCL10, CXCL11
GO_REGULATION_OF_SMOOTH_MUSCLE_CELL_APOPTOTIC_PROCESS	14	2	0.00120342	CDKN2A, IFNG
GO_CONDENSED_NUCLEAR_CHROMOSOME_CENTROMERIC_REGION	14	2	0.00120342	CENPA, PLK1
GO_LIGASE_REGULATOR_ACTIVITY	14	2	0.00120342	CDC20, CDKN2A
GO_MIDBODY	127	4	0.00127075	ASPM, CDCA8, CENPF, PLK1
GO_ACTIVATION_OF_ANAPHASE_PROMOTING_COMPLEX_ACTIVITY	15	2	0.00138525	CDC20, PLK1
GO_CXCR_CHEMOKINE_RECEPTOR_BINDING	15	2	0.00138525	CXCL10, CXCL11
GO_REGULATION_OF_CELL_ADHESION	592	8	0.00148889	ADAMDEC1, CD274, CDKN2A, IDO1, IFNG, JAK2, KANK1, PDCD1LG2
GO_REGULATION_OF_CELLULAR_COMPONENT_MOVEMENT	738	9	0.00151769	CCL4, CCL8, CD274, CXCL10, CXCL11, GTSE1, IFNG, JAK2, KANK1
GO_MICROTUBULE_PLUS_END	16	2	0.00157936	KIF18B, KIF2C
GO_REGULATION_OF_SISTER_CHROMATID_SEGREGATION	62	3	0.00158336	CENPF, PLK1, TTK
GO_CELL_CYCLE_G2_M_PHASE_TRANSITION	135	4	0.00159165	HAUS6, MELK, PLK1, TPX2
GO_POSITIVE_REGULATION_OF_CELLULAR_PROTEIN_LOCALIZATION	340	6	0.00161	CDKN2A, GTSE1, IFNG, JAK2, KANK1, PLK1
GO_CYTOSKELETON	1782	15	0.00178446	ASPM, CDC20, CDCA8, CENPF, CNTLN, FAM83D, GTSE1, HAUS6, JAK2, KIF18B, KIF24, KIF2C, PLK1, TPX2, TTK
GO_HETEROCHROMATIN	65	3	0.00181431	CDKN2A, PSIP1, UHRF2
GO_POSITIVE_REGULATION_OF_CELL_CYCLE_PROCESS	236	5	0.00182222	CDKN2A, FAM83D, GTSE1, PLK1, UHRF2
GO_REGULATION_OF_CELL_CELL_ADHESION	349	6	0.00183753	CD274, CDKN2A, IDO1, IFNG, JAK2, PDCD1LG2
GO_NEGATIVE_REGULATION_OF_CELL_PROLIFERATION	613	8	0.00185502	CCL8, CD274, CDKN2A, IDO1, IFNG, JAK2, NFIB, PDCD1LG2
GO_RESPONSE_TO_VIRUS	238	5	0.00189074	CCL4, CCL8, CXCL10, IFI44L, IFNG
GO_MITOTIC_SPINDLE_ORGANIZATION	66	3	0.00189571	MYBL2, TPX2, TTK
GO_CELL_DEATH_IN_RESPONSE_TO_OXIDATIVE_STRESS	18	2	0.00200408	JAK2, MELK
GO_REGULATION_OF_LEUKOCYTE_MIGRATION	144	4	0.00201571	CCL4, CCL8, CXCL10, CXCL11
GO_REGULATION_OF_CYTOSKELETON_ORGANIZATION	484	7	0.00204506	ASPM, HAUS6, KANK1, MYBL2, PLK1, TPX2, TTK
GO_REGULATION_OF_SPINDLE_ORGANIZATION	19	2	0.0022345	PLK1, TPX2
GO_REGULATION_OF_LYMPHOCYTE_CHEMOTAXIS	19	2	0.0022345	CCL4, CXCL10
GO_NEGATIVE_REGULATION_OF_CELL_ACTIVATION	149	4	0.00228226	CD274, CDKN2A, IDO1, PDCD1LG2
GO_CELL_CYCLE_PHASE_TRANSITION	249	5	0.00230194	CDKN2A, HAUS6, MELK, PLK1, TPX2
GO_GRANULOCYTE_MIGRATION	71	3	0.00233685	CCL4, CCL8, IFNG
GO_NEGATIVE_REGULATION_OF_CELLULAR_CATABOLIC_PROCESS	150	4	0.00233835	CDKN2A, CENPF, PLK1, TTK
GO_LEUKOCYTE_MIGRATION	254	5	0.00250897	CCL4, CCL8, CXCL10, CXCL11, IFNG
GO_REGULATION_OF_ORGANELLE_ORGANIZATION	1127	11	0.00264058	ASPM, CDC20, CDKN2A, CENPF, HAUS6, KANK1, MYBL2, PLK1, TPX2, TTK, UHRF2
GO_CELL_MOTILITY	802	9	0.00267687	ASPM, CCL4, CCL8, CXCL10, CXCL11, FAM83D, IFNG, JAK2, RFX3
GO_LOCALIZATION_OF_CELL	802	9	0.00267687	ASPM, CCL4, CCL8, CXCL10, CXCL11, FAM83D, IFNG, JAK2, RFX3
GO_TUBULIN_BINDING	261	5	0.00282117	FAM83D, KIF18B, KIF24, KIF2C, PLK1
GO_REGULATION_OF_NUCLEAR_DIVISION	158	4	0.0028217	CDC20, CENPF, PLK1, TTK
GO_CELL_PROLIFERATION	656	8	0.00282672	ASPM, CENPF, FAM83D, KIF2C, MELK, PLK1, TPX2, UHRF2
GO_MICROTUBULE_MOTOR_ACTIVITY	76	3	0.00283677	KIF18B, KIF24, KIF2C
GO_SOMATIC_STEM_CELL_DIVISION	22	2	0.00299699	ASPM, CDKN2A
GO_REGULATION_OF_RESPONSE_TO_INTERFERON_GAMMA	22	2	0.00299699	IFNG, JAK2
GO_REGULATION_OF_LEUKOCYTE_APOPTOTIC_PROCESS	78	3	0.00305376	CD274, CDKN2A, IDO1
GO_REGULATION_OF_CELLULAR_PROTEIN_CATABOLIC_PROCESS	267	5	0.00311044	CDC20, CDKN2A, CENPF, PLK1, TTK
GO_MACROMOLECULAR_COMPLEX_ASSEMBLY	1330	12	0.00318133	ASPM, CDKN2A, CENPA, CENPF, CENPI, GBP5, HAUS6, JAK2, MYBL2, PSIP1, RANBP6, TPX2
GO_REGULATION_OF_CAMP_MEDIATED_SIGNALING	23	2	0.00327459	CXCL10, CXCL11
GO_POSITIVE_REGULATION_OF_LEUKOCYTE_CHEMOTAXIS	80	3	0.0032807	CCL4, CXCL10, CXCL11
GO_MICROTUBULE_ORGANIZING_CENTER_ORGANIZATION	81	3	0.00339795	CNTLN, HAUS6, PLK1
GO_POSITIVE_REGULATION_OF_CYTOPLASMIC_TRANSPORT	273	5	0.00342061	CXCL10, CXCL11, GTSE1, JAK2, KANK1
GO_RESPONSE_TO_CYTOKINE	679	8	0.00348977	CCL4, CCL8, CD274, CXCL10, CXCL11, GBP5, IFNG, JAK2
GO_POSITIVE_REGULATION_OF_CELL_CYCLE_ARREST	82	3	0.00351774	CDKN2A, GTSE1, UHRF2
GO_ORGANELLE_LOCALIZATION	399	6	0.00357659	ASPM, CDCA8, CENPA, CENPF, FAM83D, KIF2C
GO_REGULATION_OF_RESPONSE_TO_WOUNDING	401	6	0.00366523	CCL4, CCL8, GBP5, IDO1, JAK2, KANK1
GO_REGULATION_OF_HOMOTYPIC_CELL_CELL_ADHESION	279	5	0.00375252	CD274, CDKN2A, IDO1, IFNG, PDCD1LG2
GO_REGULATION_OF_INFLAMMATORY_RESPONSE	286	5	0.00416834	CCL4, CCL8, GBP5, IDO1, JAK2
GO_POSITIVE_REGULATION_OF_LYMPHOCYTE_MIGRATION	26	2	0.00417648	CCL4, CXCL10
GO_SPINDLE_MIDZONE	26	2	0.00417648	CDCA8, PLK1
GO_REGULATION_OF_PHOSPHORUS_METABOLIC_PROCESS	1567	13	0.0043466	APLN, CCL4, CCL8, CDKN2A, CLSPN, CXCL10, CXCL11, FAM83D, IFNG, JAK2, PLK1, TPX2, TTK
GO_POSITIVE_REGULATION_OF_T_CELL_PROLIFERATION	90	3	0.00456956	CD274, IFNG, PDCD1LG2
GO_POSITIVE_REGULATION_OF_LEUKOCYTE_APOPTOTIC_PROCESS	28	2	0.00483446	CDKN2A, IDO1
GO_POSITIVE_REGULATION_OF_PHOSPHATASE_ACTIVITY	28	2	0.00483446	IFNG, JAK2
GO_CYTOKINE_MEDIATED_SIGNALING_PATHWAY	426	6	0.00491675	CCL4, CCL8, CXCL10, CXCL11, IFNG, JAK2
GO_REGULATION_OF_LEUKOCYTE_CHEMOTAXIS	93	3	0.0050079	CCL4, CXCL10, CXCL11
GO_REGULATION_OF_CELLULAR_LOCALIZATION	1229	11	0.00512296	APLN, CD274, CDKN2A, CXCL10, CXCL11, GTSE1, IFNG, JAK2, KANK1, PLK1, RFX3
GO_CELLULAR_RESPONSE_TO_CYTOKINE_STIMULUS	572	7	0.00514692	CCL4, CCL8, CXCL10, CXCL11, GBP5, IFNG, JAK2
GO_STEM_CELL_DIVISION	29	2	0.00518021	ASPM, CDKN2A
GO_PROTEIN_IMPORT_INTO_NUCLEUS_TRANSLOCATION	29	2	0.00518021	IFNG, RANBP6
GO_REGULATION_OF_THE_FORCE_OF_HEART_CONTRACTION	29	2	0.00518021	APLN, IFNG
GO_MYELOID_LEUKOCYTE_MIGRATION	95	3	0.00531375	CCL4, CCL8, IFNG
GO_NEGATIVE_REGULATION_OF_CHROMOSOME_ORGANIZATION	95	3	0.00531375	CENPF, PLK1, TTK
GO_REGULATION_OF_CELL_ACTIVATION	435	6	0.00543661	CD274, CDKN2A, IDO1, IFNG, JAK2, PDCD1LG2
GO_POSITIVE_REGULATION_OF_INTERLEUKIN_1_BETA_PRODUCTION	30	2	0.00553701	IFNG, JAK2
GO_KINESIN_BINDING	30	2	0.00553701	FAM83D, KIF18B
GO_INFLAMMATORY_RESPONSE	437	6	0.00555743	CCL4, CCL8, CXCL10, CXCL11, GBP5, IDO1
GO_LOCOMOTION	1066	10	0.00556151	ASPM, CCL4, CCL8, CXCL10, CXCL11, FAM83D, IFNG, JAK2, NFIB, RFX3
GO_REGULATION_OF_TUMOR_NECROSIS_FACTOR_SUPERFAMILY_CYTOKINE_PRODUCTION	97	3	0.00563064	CD274, IFNG, JAK2
GO_POSITIVE_REGULATION_OF_TRANSPORT	900	9	0.00571842	APLN, CCL4, CD274, CXCL10, CXCL11, GTSE1, IFNG, JAK2, KANK1
GO_MICROTUBULE_BASED_MOVEMENT	194	4	0.00585159	KIF18B, KIF24, KIF2C, RFX3
GO_NEGATIVE_REGULATION_OF_CYCLIN_DEPENDENT_PROTEIN_KINASE_ACTIVITY	31	2	0.00590479	CDKN2A, PLK1
GO_NEGATIVE_REGULATION_OF_INTERFERON_GAMMA_PRODUCTION	31	2	0.00590479	CD274, PDCD1LG2
GO_NUCLEAR_HETEROCHROMATIN	31	2	0.00590479	PSIP1, UHRF2
GO_PROTEIN_COMPLEX_BIOGENESIS	1079	10	0.00604946	ASPM, CENPA, CENPF, CENPI, GBP5, HAUS6, JAK2, MYBL2, RANBP6, TPX2
GO_PROTEIN_COMPLEX_ASSEMBLY	1079	10	0.00604946	ASPM, CENPA, CENPF, CENPI, GBP5, HAUS6, JAK2, MYBL2, RANBP6, TPX2
GO_NEGATIVE_REGULATION_OF_CATABOLIC_PROCESS	196	4	0.00606526	CDKN2A, CENPF, PLK1, TTK
GO_RESPONSE_TO_MOLECULE_OF_BACTERIAL_ORIGIN	314	5	0.00616539	CXCL10, CXCL11, IDO1, IFNG, JAK2
GO_TAXIS	448	6	0.00625754	CCL4, CCL8, CXCL10, CXCL11, IFNG, NFIB
GO_POSITIVE_REGULATION_OF_INTERLEUKIN_12_PRODUCTION	32	2	0.00628346	IDO1, IFNG
GO_NEGATIVE_REGULATION_OF_CYTOKINE_PRODUCTION	198	4	0.00628408	CD274, IDO1, IFNG, PDCD1LG2
GO_POSITIVE_REGULATION_OF_CELL_CYCLE	316	5	0.00632989	CDKN2A, FAM83D, GTSE1, PLK1, UHRF2
GO_REGULATION_OF_PROTEIN_UBIQUITINATION_INVOLVED_IN_UBIQUITIN_DEPENDENT_PROTEIN_CATABOLIC_PROCESS	102	3	0.00647182	CDC20, CDKN2A, PLK1
GO_REGULATION_OF_PEPTIDE_SECRETION	200	4	0.0065081	APLN, IFNG, JAK2, RFX3
GO_POSITIVE_REGULATION_OF_CALCIUM_ION_TRANSPORT	103	3	0.00664855	CCL4, CXCL10, CXCL11
GO_REGULATION_OF_CELL_CYCLE_ARREST	103	3	0.00664855	CDKN2A, GTSE1, UHRF2
GO_REGULATION_OF_PROTEIN_EXPORT_FROM_NUCLEUS	33	2	0.00667294	CDKN2A, GTSE1
GO_REGULATION_OF_T_CELL_APOPTOTIC_PROCESS	33	2	0.00667294	CD274, IDO1
GO_G2_DNA_DAMAGE_CHECKPOINT	33	2	0.00667294	CLSPN, PLK1
GO_POSITIVE_REGULATION_OF_PROTEIN_MODIFICATION_PROCESS	1095	10	0.00669568	CCL4, CCL8, CDC20, CDKN2A, CLSPN, IFNG, JAK2, PLK1, TPX2, TTK
GO_PROTEIN_DESTABILIZATION	34	2	0.00707314	CDKN2A, PLK1
GO_CCR_CHEMOKINE_RECEPTOR_BINDING	34	2	0.00707314	CCL4, CCL8
GO_CENTROSOME	461	6	0.0071658	CDC20, CENPF, CNTLN, HAUS6, KIF24, PLK1
GO_NEGATIVE_REGULATION_OF_BLOOD_CIRCULATION	35	2	0.00748398	APLN, JAK2
GO_REGULATION_OF_LYMPHOCYTE_MIGRATION	35	2	0.00748398	CCL4, CXCL10
GO_EXTERNAL_SIDE_OF_PLASMA_MEMBRANE	209	4	0.00758198	CD274, CXCL10, FCGR3A, IFNG
GO_REGULATION_OF_CYTOPLASMIC_TRANSPORT	468	6	0.00769282	CDKN2A, CXCL10, CXCL11, GTSE1, JAK2, KANK1
GO_POSITIVE_REGULATION_OF_INTERLEUKIN_1_PRODUCTION	36	2	0.00790538	IFNG, JAK2
GO_REGULATION_OF_PROTEIN_STABILITY	213	4	0.00809465	CDC37L1, CDKN2A, GTSE1, PLK1
GO_SPINDLE_LOCALIZATION	37	2	0.00833726	ASPM, CENPA
GO_POSITIVE_REGULATION_OF_RELEASE_OF_SEQUESTERED_CALCIUM_ION_INTO_CYTOSOL	37	2	0.00833726	CXCL10, CXCL11
GO_REGULATION_OF_NUCLEOCYTOPLASMIC_TRANSPORT	216	4	0.00849379	CDKN2A, GTSE1, JAK2, KANK1
GO_DEFENSE_RESPONSE	1148	10	0.00923076	CCL4, CCL8, CXCL10, CXCL11, GBP5, IDO1, IFI44L, IFNG, JAK2, KIR2DL4
GO_PROTEIN_LOCALIZATION_TO_CHROMOSOME	39	2	0.00923214	CENPA, PLK1
GO_MACROMOLECULAR_COMPLEX_BINDING	1335	11	0.00940008	CDC20, CENPA, CENPF, CLSPN, FAM83D, FCGR3A, KIF18B, KIF24, KIF2C, PLK1, PSIP1
GO_POSITIVE_REGULATION_OF_INTRACELLULAR_TRANSPORT	349	5	0.0095098	CXCL10, CXCL11, GTSE1, JAK2, KANK1
GO_REGULATION_OF_MEIOTIC_CELL_CYCLE	40	2	0.00969497	ASPM, CDC20
GO_MITOTIC_SPINDLE_ASSEMBLY	40	2	0.00969497	MYBL2, TPX2
GO_MICROTUBULE_CYTOSKELETON_ORGANIZATION_INVOLVED_IN_MITOSIS	40	2	0.00969497	MYBL2, TPX2
GO_MONOCYTE_CHEMOTAXIS	40	2	0.00969497	CCL4, CCL8
GO_POSITIVE_REGULATION_OF_NUCLEOCYTOPLASMIC_TRANSPORT	119	3	0.00987227	GTSE1, JAK2, KANK1
GO_POSITIVE_REGULATION_OF_CHEMOTAXIS	119	3	0.00987227	CCL4, CXCL10, CXCL11
GO_CELLULAR_PROTEIN_COMPLEX_DISASSEMBLY	120	3	0.010099	KIF18B, KIF24, KIF2C
GO_NUCLEOLUS	814	8	0.010151	CA9, CDCA8, CDKN2A, NFIB, PLK1, PSIP1, RCL1, SPC24
GO_CELLULAR_COMPONENT_DISASSEMBLY	497	6	0.010179	CDKN2A, CLSPN, KIF18B, KIF24, KIF2C, PLK1
GO_POSITIVE_REGULATION_OF_PROTEOLYSIS	356	5	0.0103043	CDC20, CDKN2A, IFNG, JAK2, PLK1
GO_NUCLEAR_CHROMOSOME	500	6	0.0104654	CENPA, KDM4C, PLK1, PSIP1, RFX3, UHRF2
GO_POSITIVE_REGULATION_OF_CYTOKINE_PRODUCTION	358	5	0.0105394	CD274, GBP5, IDO1, IFNG, JAK2
GO_POSITIVE_REGULATION_OF_DEFENSE_RESPONSE	359	5	0.0106583	CCL4, CCL8, GBP5, IDO1, JAK2
GO_RESPONSE_TO_BIOTIC_STIMULUS	831	8	0.0114107	CCL4, CCL8, CXCL10, CXCL11, IDO1, IFI44L, IFNG, JAK2
GO_PROTEIN_STABILIZATION	127	3	0.0117712	CDC37L1, CDKN2A, GTSE1
GO_NUCLEAR_IMPORT	127	3	0.0117712	IFNG, JAK2, RANBP6
GO_REGULATION_OF_LIGASE_ACTIVITY	128	3	0.0120223	CDC20, CDKN2A, PLK1
GO_NEGATIVE_REGULATION_OF_BINDING	128	3	0.0120223	GTSE1, JAK2, NFIB
GO_POSITIVE_REGULATION_OF_DEPHOSPHORYLATION	45	2	0.0121599	IFNG, JAK2
GO_NON_MEMBRANE_SPANNING_PROTEIN_TYROSINE_KINASE_ACTIVITY	45	2	0.0121599	JAK2, MELK
GO_GUANYL_NUCLEOTIDE_BINDING	373	5	0.0124218	AK3, GBP4, GBP5, IFI44L, TPX2
GO_POSITIVE_REGULATION_OF_LEUKOCYTE_PROLIFERATION	130	3	0.0125337	CD274, IFNG, PDCD1LG2
GO_MOTOR_ACTIVITY	130	3	0.0125337	KIF18B, KIF24, KIF2C
GO_NEGATIVE_REGULATION_OF_DNA_BINDING	46	2	0.0126825	JAK2, NFIB
GO_REGULATION_OF_PEPTIDE_TRANSPORT	246	4	0.0132104	APLN, IFNG, JAK2, RFX3
GO_POSITIVE_REGULATION_OF_REACTIVE_OXYGEN_SPECIES_BIOSYNTHETIC_PROCESS	47	2	0.0132148	IFNG, JAK2
GO_REGULATION_OF_INTERLEUKIN_1_BETA_PRODUCTION	47	2	0.0132148	IFNG, JAK2
GO_REGULATION_OF_CELLULAR_PROTEIN_LOCALIZATION	527	6	0.0133081	CDKN2A, GTSE1, IFNG, JAK2, KANK1, PLK1
GO_SIDE_OF_MEMBRANE	380	5	0.013374	CD274, CXCL10, FCGR3A, IFNG, JAK2
GO_REGULATION_OF_PROTEOLYSIS	692	7	0.013918	CDC20, CDKN2A, CENPF, IFNG, JAK2, PLK1, TTK
GO_RIBONUCLEOTIDE_BINDING	1808	13	0.0140336	AK3, CBWD1, GBP4, GBP5, IFI44L, JAK2, KIF18B, KIF24, KIF2C, MELK, PLK1, TPX2, TTK
GO_REGULATION_OF_INTERLEUKIN_12_PRODUCTION	49	2	0.0143081	IDO1, IFNG
GO_REGULATION_OF_HORMONE_SECRETION	252	4	0.0143193	APLN, IFNG, JAK2, RFX3
GO_ESTABLISHMENT_OR_MAINTENANCE_OF_CELL_POLARITY	137	3	0.0144215	CCL4, CENPA, KIF2C
GO_REGULATION_OF_CYTOKINE_PRODUCTION	537	6	0.0144871	CD274, GBP5, IDO1, IFNG, JAK2, PDCD1LG2
GO_SINGLE_ORGANISM_CELLULAR_LOCALIZATION	870	8	0.0147374	ASPM, CDCA8, CENPA, IFNG, JAK2, KIF2C, RANBP6, TOMM5
GO_HISTONE_EXCHANGE	50	2	0.014869	CENPA, CENPI
GO_POSITIVE_REGULATION_OF_CALCIUM_ION_TRANSPORT_INTO_CYTOSOL	50	2	0.014869	CXCL10, CXCL11
GO_DNA_REPLICATION_INDEPENDENT_NUCLEOSOME_ASSEMBLY	50	2	0.014869	CENPA, CENPI
GO_DNA_REPLICATION_INDEPENDENT_NUCLEOSOME_ORGANIZATION	50	2	0.014869	CENPA, CENPI
GO_POSITIVE_REGULATION_OF_RESPONSE_TO_STIMULUS	1825	13	0.0150951	ASPM, CCL4, CCL8, CDKN2A, CXCL10, CXCL11, FCGR3A, GBP5, IDO1, IFNG, JAK2, KANK1, TTK
GO_NEGATIVE_REGULATION_OF_CELL_SUBSTRATE_ADHESION	51	2	0.0154392	CDKN2A, KANK1
GO_MITOTIC_SPINDLE	51	2	0.0154392	ASPM, FAM83D
GO_DNA_INTEGRITY_CHECKPOINT	141	3	0.0155688	CLSPN, GTSE1, PLK1
GO_REGULATION_OF_NITRIC_OXIDE_BIOSYNTHETIC_PROCESS	52	2	0.0160188	IFNG, JAK2
GO_INTERFERON_GAMMA_MEDIATED_SIGNALING_PATHWAY	52	2	0.0160188	IFNG, JAK2
GO_POSITIVE_REGULATION_OF_CALCIUM_ION_IMPORT	52	2	0.0160188	CXCL10, CXCL11
GO_REGULATION_OF_CATABOLIC_PROCESS	714	7	0.0162821	CDC20, CDKN2A, CENPF, FAM83D, IFNG, PLK1, TTK
GO_REGULATION_OF_PROTEASOMAL_UBIQUITIN_DEPENDENT_PROTEIN_CATABOLIC_PROCESS	144	3	0.0164623	CENPF, PLK1, TTK
GO_PROTEIN_COMPLEX_BINDING	891	8	0.0167995	CDC20, CLSPN, FAM83D, FCGR3A, KIF18B, KIF24, KIF2C, PLK1
GO_REGULATION_OF_PROTEIN_MODIFICATION_PROCESS	1649	12	0.0168689	CCL4, CCL8, CDC20, CDKN2A, CLSPN, CXCL10, FAM83D, IFNG, JAK2, PLK1, TPX2, TTK
GO_CHROMATIN_REMODELING	146	3	0.0170737	CDKN2A, CENPA, CENPI
GO_REGULATION_OF_CHROMOSOME_ORGANIZATION	266	4	0.0171327	CENPF, PLK1, TTK, UHRF2
GO_REGULATION_OF_LYMPHOCYTE_APOPTOTIC_PROCESS	54	2	0.0172056	CD274, IDO1
GO_POSITIVE_REGULATION_OF_CELL_ACTIVATION	271	4	0.0182157	CD274, IFNG, JAK2, PDCD1LG2
GO_POSITIVE_REGULATION_OF_TUMOR_NECROSIS_FACTOR_SUPERFAMILY_CYTOKINE_PRODUCTION	56	2	0.0184287	IFNG, JAK2
GO_POSITIVE_REGULATION_OF_CALCIUM_ION_TRANSMEMBRANE_TRANSPORT	56	2	0.0184287	CXCL10, CXCL11
GO_PROTEIN_IMPORT	151	3	0.0186575	IFNG, JAK2, RANBP6
GO_HEPARIN_BINDING	151	3	0.0186575	CCL8, CXCL10, CXCL11
GO_REGULATION_OF_PROTEIN_LOCALIZATION	909	8	0.0187282	CD274, CDKN2A, GTSE1, IFNG, JAK2, KANK1, PLK1, RFX3
GO_PROTEIN_LOCALIZATION_TO_NUCLEUS	152	3	0.0189837	IFNG, JAK2, RANBP6
GO_REGULATION_OF_INTERLEUKIN_1_PRODUCTION	57	2	0.0190537	IFNG, JAK2
GO_SPINDLE_MICROTUBULE	57	2	0.0190537	KIF18B, PLK1
GO_POSITIVE_REGULATION_OF_CELL_COMMUNICATION	1489	11	0.0200731	APLN, ASPM, CCL4, CCL8, CDKN2A, CXCL10, CXCL11, IFNG, JAK2, KANK1, TTK
GO_REGULATION_OF_BINDING	280	4	0.020271	GTSE1, JAK2, NFIB, PLK1
GO_DEFENSE_RESPONSE_TO_VIRUS	157	3	0.0206626	CXCL10, IFI44L, IFNG
GO_MICROTUBULE_ORGANIZING_CENTER	583	6	0.0208626	CDC20, CENPF, CNTLN, HAUS6, KIF24, PLK1
GO_NUCLEAR_CHROMATIN	283	4	0.0209867	KDM4C, PSIP1, RFX3, UHRF2
GO_KINASE_BINDING	593	6	0.0224674	CDKN2A, CNTLN, FAM83D, JAK2, PLK1, TPX2
GO_REGULATION_OF_INTRACELLULAR_TRANSPORT	594	6	0.0226323	CDKN2A, CXCL10, CXCL11, GTSE1, JAK2, KANK1
GO_LYMPHOCYTE_COSTIMULATION	63	2	0.0229873	CD274, PDCD1LG2
GO_REGULATION_OF_REACTIVE_OXYGEN_SPECIES_BIOSYNTHETIC_PROCESS	64	2	0.0236729	IFNG, JAK2
GO_LYASE_ACTIVITY	167	3	0.0242588	CA9, GLDC, NEIL3
GO_CARBON_OXYGEN_LYASE_ACTIVITY	65	2	0.0243668	CA9, NEIL3
GO_CHROMATIN_ASSEMBLY_OR_DISASSEMBLY	168	3	0.0246359	CDKN2A, CENPA, CENPI
GO_REGULATION_OF_CELL_SUBSTRATE_ADHESION	169	3	0.0250163	CDKN2A, JAK2, KANK1
GO_REGULATION_OF_TYROSINE_PHOSPHORYLATION_OF_STAT_PROTEIN	67	2	0.0257795	IFNG, JAK2
GO_POSITIVE_REGULATION_OF_CELL_CYCLE_PHASE_TRANSITION	67	2	0.0257795	FAM83D, PLK1
GO_POSITIVE_REGULATION_OF_TRANSCRIPTION_FROM_RNA_POLYMERASE_II_PROMOTER	972	8	0.0267455	CDKN2A, CXCL10, GLIS3, IFNG, MYBL2, NFIB, PSIP1, RFX3
GO_PROTEIN_TYROSINE_KINASE_ACTIVITY	175	3	0.0273648	JAK2, MELK, TTK
GO_REGULATION_OF_CHEMOTAXIS	176	3	0.0277674	CCL4, CXCL10, CXCL11
GO_NEURAL_PRECURSOR_CELL_PROLIFERATION	70	2	0.0279595	ASPM, MELK
GO_REGULATION_OF_PROTEASOMAL_PROTEIN_CATABOLIC_PROCESS	177	3	0.0281731	CENPF, PLK1, TTK
GO_MACROMOLECULAR_COMPLEX_DISASSEMBLY	178	3	0.028582	KIF18B, KIF24, KIF2C
GO_ATP_DEPENDENT_CHROMATIN_REMODELING	71	2	0.0287022	CENPA, CENPI
GO_REGULATION_OF_INTERLEUKIN_10_SECRETION	8	1	0.0293877	CD274
GO_POSITIVE_REGULATION_OF_STAT_CASCADE	72	2	0.0294528	IFNG, JAK2
GO_POSITIVE_REGULATION_OF_JAK_STAT_CASCADE	72	2	0.0294528	IFNG, JAK2
GO_PEPTIDYL_AMINO_ACID_MODIFICATION	807	7	0.0294881	CDCA8, CDKN2A, CLSPN, JAK2, MELK, PLK1, TTK
GO_CELLULAR_PROTEIN_COMPLEX_ASSEMBLY	316	4	0.0298954	CENPA, CENPF, JAK2, RANBP6
GO_REGULATION_OF_RELEASE_OF_SEQUESTERED_CALCIUM_ION_INTO_CYTOSOL	73	2	0.0302112	CXCL10, CXCL11
GO_NEGATIVE_REGULATION_OF_PROTEOLYSIS	319	4	0.0308011	CDKN2A, CENPF, PLK1, TTK
GO_DNA_PACKAGING	184	3	0.0311019	CDKN2A, CENPA, CENPI
GO_PEPTIDYL_TYROSINE_MODIFICATION	185	3	0.0315329	JAK2, MELK, TTK
GO_PROTEIN_C_TERMINUS_BINDING	185	3	0.0315329	CDC20, CENPF, JAK2
GO_ANAPHASE_PROMOTING_COMPLEX_DEPENDENT_CATABOLIC_PROCESS	76	2	0.0325327	CDC20, PLK1
GO_REGULATION_OF_MULTICELLULAR_ORGANISMAL_DEVELOPMENT	1604	11	0.0326641	ASPM, CDC20, CDKN2A, CENPF, CXCL10, DMRT3, IDO1, IFNG, KANK1, NFIB, RFX3
GO_VENTRAL_SPINAL_CORD_INTERNEURON_SPECIFICATION	9	1	0.0330009	DMRT3
GO_POSITIVE_REGULATION_OF_SYNAPSE_MATURATION	9	1	0.0330009	CDC20
GO_CELL_FATE_SPECIFICATION_INVOLVED_IN_PATTERN_SPECIFICATION	9	1	0.0330009	DMRT3
GO_POSITIVE_REGULATION_OF_ESTABLISHMENT_OF_PROTEIN_LOCALIZATION	485	5	0.0339831	CD274, GTSE1, IFNG, JAK2, KANK1
GO_CONDENSED_NUCLEAR_CHROMOSOME	78	2	0.0341182	CENPA, PLK1
GO_POSITIVE_REGULATION_OF_PROTEIN_MODIFICATION_BY_SMALL_PROTEIN_CONJUGATION_OR_REMOVAL	191	3	0.0341852	CDC20, CDKN2A, PLK1
GO_RESPONSE_TO_BACTERIUM	487	5	0.0345001	CXCL10, CXCL11, IDO1, IFNG, JAK2
GO_DIOXYGENASE_ACTIVITY	79	2	0.0349222	IDO1, KDM4C
GO_GLYCOSAMINOGLYCAN_BINDING	195	3	0.0360162	CCL8, CXCL10, CXCL11
GO_REGULATION_OF_NLRP3_INFLAMMASOME_COMPLEX_ASSEMBLY	10	1	0.0366009	GBP5
GO_REGULATION_OF_T_CELL_TOLERANCE_INDUCTION	10	1	0.0366009	IDO1
GO_TYROSINE_PHOSPHORYLATION_OF_STAT_PROTEIN	10	1	0.0366009	JAK2
GO_POSITIVE_REGULATION_OF_INTRACELLULAR_SIGNAL_TRANSDUCTION	851	7	0.0377519	CCL4, CCL8, CDKN2A, CXCL10, CXCL11, IFNG, JAK2
GO_CELLULAR_RESPONSE_TO_INTERLEUKIN_1	83	2	0.038211	CCL4, CCL8
GO_TRANSCRIPTIONAL_REPRESSOR_ACTIVITY_RNA_POLYMERASE_II_TRANSCRIPTION_FACTOR_BINDING	83	2	0.038211	NFIB, PSIP1
GO_POSITIVE_REGULATION_OF_PROTEIN_METABOLIC_PROCESS	1439	10	0.0383011	CCL4, CCL8, CDC20, CDKN2A, CLSPN, IFNG, JAK2, PLK1, TPX2, TTK
GO_REGULATION_OF_CALCIUM_ION_TRANSPORT	201	3	0.0388563	CCL4, CXCL10, CXCL11
GO_POSITIVE_REGULATION_OF_REACTIVE_OXYGEN_SPECIES_METABOLIC_PROCESS	84	2	0.0390511	IFNG, JAK2
GO_CELLULAR_MACROMOLECULAR_COMPLEX_ASSEMBLY	676	6	0.0390993	CENPA, CENPF, CENPI, JAK2, PSIP1, RANBP6
GO_NUCLEAR_TRANSPORT	345	4	0.0393314	IFNG, JAK2, PSIP1, RANBP6
GO_POSITIVE_REGULATION_OF_PROTEIN_SECRETION	202	3	0.0393405	CD274, IFNG, JAK2
GO_MYELOID_CELL_HOMEOSTASIS	85	2	0.0398983	IFNG, JAK2
GO_RESPONSE_TO_HEAT	85	2	0.0398983	CXCL10, PSIP1
GO_NEGATIVE_REGULATION_OF_IMMUNE_SYSTEM_PROCESS	347	4	0.0400385	CD274, CDKN2A, IDO1, PDCD1LG2
GO_POSITIVE_REGULATION_OF_TYROSINE_PHOSPHORYLATION_OF_STAT1_PROTEIN	11	1	0.0401878	IFNG
GO_REGULATION_OF_T_CELL_CHEMOTAXIS	11	1	0.0401878	CXCL10
GO_TYPE_B_PANCREATIC_CELL_DEVELOPMENT	11	1	0.0401878	RFX3
GO_PROTEIN_LOCALIZATION_TO_CHROMATIN	11	1	0.0401878	PLK1
GO_REGULATION_OF_CHRONIC_INFLAMMATORY_RESPONSE	11	1	0.0401878	IDO1
GO_VIRAL_LATENCY	11	1	0.0401878	PSIP1
GO_POSITIVE_REGULATION_OF_PROTEIN_SUMOYLATION	11	1	0.0401878	CDKN2A
GO_HETEROCHROMATIN_ORGANIZATION	11	1	0.0401878	CDKN2A
GO_NEGATIVE_REGULATION_OF_INTERLEUKIN_17_PRODUCTION	11	1	0.0401878	IFNG
GO_UTP_METABOLIC_PROCESS	11	1	0.0401878	AK3
GO_REGULATION_OF_ODONTOGENESIS_OF_DENTIN_CONTAINING_TOOTH	11	1	0.0401878	DMRT3
GO_INSULIN_RECEPTOR_SUBSTRATE_BINDING	11	1	0.0401878	JAK2
GO_POSITIVE_REGULATION_OF_CELL_ADHESION	348	4	0.0403948	CD274, IFNG, JAK2, PDCD1LG2
GO_REGULATION_OF_STEM_CELL_PROLIFERATION	86	2	0.0407525	ASPM, NFIB
GO_POSITIVE_REGULATION_OF_PEPTIDE_SECRETION	86	2	0.0407525	APLN, JAK2
GO_ESTABLISHMENT_OF_PROTEIN_LOCALIZATION_TO_ORGANELLE	350	4	0.0411128	IFNG, JAK2, RANBP6, TOMM5
GO_POSITIVE_REGULATION_OF_HOMEOSTATIC_PROCESS	206	3	0.0413082	APLN, CXCL10, CXCL11
GO_CHROMATIN_MODIFICATION	512	5	0.0413795	CDKN2A, CENPA, CENPI, JAK2, KDM4C
GO_POSITIVE_REGULATION_OF_CAMP_METABOLIC_PROCESS	87	2	0.0416136	CXCL10, CXCL11
GO_REGULATION_OF_INTERFERON_GAMMA_PRODUCTION	88	2	0.0424816	CD274, PDCD1LG2
GO_RNA_POLYMERASE_II_TRANSCRIPTION_COFACTOR_ACTIVITY	88	2	0.0424816	NFIB, PSIP1
GO_NEGATIVE_REGULATION_BY_HOST_OF_VIRAL_TRANSCRIPTION	12	1	0.0437615	CCL4
GO_REGULATION_OF_VITAMIN_METABOLIC_PROCESS	12	1	0.0437615	IFNG
GO_PROTEIN_LOCALIZATION_TO_CHROMOSOME_CENTROMERIC_REGION	12	1	0.0437615	CENPA
GO_PRODUCTION_OF_MOLECULAR_MEDIATOR_INVOLVED_IN_INFLAMMATORY_RESPONSE	12	1	0.0437615	IDO1
GO_CILIUM_OR_FLAGELLUM_DEPENDENT_CELL_MOTILITY	12	1	0.0437615	RFX3
GO_REGULATION_OF_REGULATORY_T_CELL_DIFFERENTIATION	12	1	0.0437615	IFNG
GO_REGULATION_OF_CHEMOKINE_BIOSYNTHETIC_PROCESS	12	1	0.0437615	IFNG
GO_REPLICATIVE_SENESCENCE	12	1	0.0437615	CDKN2A
GO_NEGATIVE_REGULATION_OF_CARDIAC_MUSCLE_CELL_APOPTOTIC_PROCESS	12	1	0.0437615	JAK2
GO_POSITIVE_REGULATION_OF_CATENIN_IMPORT_INTO_NUCLEUS	12	1	0.0437615	KANK1
GO_TRYPTOPHAN_METABOLIC_PROCESS	12	1	0.0437615	IDO1
GO_REGULATION_OF_SYNAPSE_MATURATION	12	1	0.0437615	CDC20
GO_NEGATIVE_REGULATION_OF_SUBSTRATE_ADHESION_DEPENDENT_CELL_SPREADING	12	1	0.0437615	KANK1
GO_OUTER_MITOCHONDRIAL_MEMBRANE_PROTEIN_COMPLEX	12	1	0.0437615	TOMM5
GO_CYCLIN_DEPENDENT_PROTEIN_SERINE_THREONINE_KINASE_INHIBITOR_ACTIVITY	12	1	0.0437615	CDKN2A
GO_IGG_BINDING	12	1	0.0437615	FCGR3A
GO_ANGIOTENSIN_RECEPTOR_BINDING	12	1	0.0437615	JAK2
GO_POSITIVE_REGULATION_OF_CATALYTIC_ACTIVITY	1474	10	0.0440307	CCL4, CCL8, CDC20, CDKN2A, CLSPN, DEPDC1, IFNG, JAK2, PLK1, TPX2
GO_REGULATION_OF_CALCIUM_ION_TRANSPORT_INTO_CYTOSOL	90	2	0.0442379	CXCL10, CXCL11
GO_CORE_PROMOTER_PROXIMAL_REGION_DNA_BINDING	359	4	0.044434	DMRT3, MYBL2, NFIB, RFX3
GO_ADENYL_NUCLEOTIDE_BINDING	1477	10	0.044548	AK3, CBWD1, JAK2, KIF18B, KIF24, KIF2C, MELK, PLK1, TPX2, TTK
GO_REGULATION_OF_INTRACELLULAR_PROTEIN_TRANSPORT	360	4	0.0448122	CDKN2A, GTSE1, JAK2, KANK1
GO_POSITIVE_REGULATION_OF_SECRETION	360	4	0.0448122	APLN, CD274, IFNG, JAK2
GO_ALPHA_AMINO_ACID_CATABOLIC_PROCESS	92	2	0.0460209	GLDC, IDO1
GO_POSITIVE_REGULATION_OF_CATION_TRANSMEMBRANE_TRANSPORT	92	2	0.0460209	CXCL10, CXCL11
GO_ACTIVATION_OF_CYSTEINE_TYPE_ENDOPEPTIDASE_ACTIVITY	93	2	0.0469223	CDKN2A, JAK2
GO_REGULATION_OF_DNA_BINDING	93	2	0.0469223	JAK2, NFIB
GO_REGULATION_OF_CYCLIN_DEPENDENT_PROTEIN_KINASE_ACTIVITY	93	2	0.0469223	CDKN2A, PLK1
GO_CELLULAR_RESPONSE_TO_STRESS	1491	10	0.0470181	CA9, CDKN2A, CLSPN, CXCL10, GTSE1, IFNG, JAK2, MELK, NEIL3, PLK1
GO_REGULATION_OF_HEPATOCYTE_PROLIFERATION	13	1	0.0473221	IFNG
GO_NEURONAL_STEM_CELL_DIVISION	13	1	0.0473221	ASPM
GO_POSITIVE_REGULATION_OF_DNA_DAMAGE_RESPONSE_SIGNAL_TRANSDUCTION_BY_P53_CLASS_MEDIATOR	13	1	0.0473221	CDKN2A
GO_POSITIVE_REGULATION_OF_STEROID_BIOSYNTHETIC_PROCESS	13	1	0.0473221	IFNG
GO_POSITIVE_REGULATION_OF_PROTEIN_IMPORT_INTO_NUCLEUS_TRANSLOCATION	13	1	0.0473221	JAK2
GO_NEUROBLAST_DIVISION	13	1	0.0473221	ASPM
GO_ACTIVATION_OF_CYSTEINE_TYPE_ENDOPEPTIDASE_ACTIVITY_INVOLVED_IN_APOPTOTIC_SIGNALING_PATHWAY	13	1	0.0473221	JAK2
GO_REGULATION_OF_TRANSMISSION_OF_NERVE_IMPULSE	13	1	0.0473221	IFNG
GO_REGULATION_OF_MHC_CLASS_II_BIOSYNTHETIC_PROCESS	13	1	0.0473221	IFNG
GO_EPITHELIAL_CELL_MATURATION	13	1	0.0473221	RFX3
GO_AMP_METABOLIC_PROCESS	13	1	0.0473221	AK3
GO_CHROMOCENTER	13	1	0.0473221	CDCA8
GO_REGULATION_OF_HEART_CONTRACTION	218	3	0.047505	APLN, IFNG, JAK2
GO_POSITIVE_REGULATION_OF_CELL_CELL_ADHESION	219	3	0.0480412	CD274, IFNG, PDCD1LG2
GO_REGULATION_OF_RESPONSE_TO_EXTERNAL_STIMULUS	900	7	0.0486285	CCL4, CCL8, CXCL10, CXCL11, GBP5, IDO1, JAK2
GO_POSITIVE_REGULATION_OF_CYTOKINE_SECRETION	95	2	0.0487445	CD274, IFNG
GO_NUCLEAR_MATRIX	95	2	0.0487445	CENPF, JAK2
GO_PROTEIN_DNA_COMPLEX_SUBUNIT_ORGANIZATION	221	3	0.0491224	CENPA, CENPF, CENPI
GO_MITOTIC_DNA_INTEGRITY_CHECKPOINT	96	2	0.0496652	CLSPN, GTSE1
GO_CENTRIOLE	96	2	0.0496652	CNTLN, KIF24
GO_RESPONSE_TO_TUMOR_NECROSIS_FACTOR	223	3	0.0502155	CCL4, CCL8, JAK2
GO_REGULATION_OF_PROTEIN_SECRETION	374	4	0.0502978	CD274, IFNG, JAK2, RFX3
GO_REGULATION_OF_TRANSCRIPTION_FROM_RNA_POLYMERASE_II_PROMOTER	1721	11	0.0505369	CA9, CDKN2A, CXCL10, GLIS3, IFNG, KDM4C, MYBL2, NFIB, PLK1, PSIP1, RFX3
GO_PROTEIN_TRANSPORTER_ACTIVITY	97	2	0.0505923	RANBP6, TOMM5
GO_POSITIVE_REGULATION_OF_MITOTIC_SISTER_CHROMATID_SEPARATION	14	1	0.0508697	PLK1
GO_POSITIVE_REGULATION_OF_MITOTIC_METAPHASE_ANAPHASE_TRANSITION	14	1	0.0508697	PLK1
GO_POSITIVE_REGULATION_OF_NITRIC_OXIDE_SYNTHASE_BIOSYNTHETIC_PROCESS	14	1	0.0508697	JAK2
GO_POSITIVE_REGULATION_OF_TYPE_2_IMMUNE_RESPONSE	14	1	0.0508697	IDO1
GO_NEGATIVE_REGULATION_OF_RHO_PROTEIN_SIGNAL_TRANSDUCTION	14	1	0.0508697	KANK1
GO_VENTRAL_SPINAL_CORD_INTERNEURON_DIFFERENTIATION	14	1	0.0508697	DMRT3
GO_DNA_REPLICATION_CHECKPOINT	14	1	0.0508697	CLSPN
GO_REGULATION_OF_SPINDLE_ASSEMBLY	14	1	0.0508697	PLK1
GO_POSITIVE_REGULATION_OF_MEMBRANE_PROTEIN_ECTODOMAIN_PROTEOLYSIS	14	1	0.0508697	IFNG
GO_POSITIVE_REGULATION_OF_METAPHASE_ANAPHASE_TRANSITION_OF_CELL_CYCLE	14	1	0.0508697	PLK1
GO_PLATELET_DENSE_GRANULE_LUMEN	14	1	0.0508697	CDC37L1
GO_GLYCINE_BINDING	14	1	0.0508697	GLDC
GO_DNA_APURINIC_OR_APYRIMIDINIC_SITE_LYASE_ACTIVITY	14	1	0.0508697	NEIL3
GO_LIPASE_ACTIVATOR_ACTIVITY	14	1	0.0508697	CCL8
GO_CARBONATE_DEHYDRATASE_ACTIVITY	14	1	0.0508697	CA9
GO_REGULATION_OF_ERK1_AND_ERK2_CASCADE	227	3	0.0524376	CCL4, CCL8, FAM83D
GO_SULFUR_COMPOUND_BINDING	227	3	0.0524376	CCL8, CXCL10, CXCL11
GO_EXTRINSIC_APOPTOTIC_SIGNALING_PATHWAY	99	2	0.0524651	IFNG, JAK2
GO_REGULATION_OF_CALCIUM_ION_IMPORT	99	2	0.0524651	CXCL10, CXCL11
GO_POSITIVE_REGULATION_OF_ION_TRANSPORT	228	3	0.0530005	CCL4, CXCL10, CXCL11
GO_PROTEOLYSIS	1118	8	0.054001	ADAMDEC1, CDC20, CDKN2A, ERMP1, GTSE1, JAK2, PLK1, UHRF2
GO_REGULATION_OF_TRANSFERASE_ACTIVITY	922	7	0.0541093	CDC20, CDKN2A, CLSPN, CXCL10, JAK2, PLK1, TPX2
GO_PYRIMIDINE_RIBONUCLEOSIDE_TRIPHOSPHATE_METABOLIC_PROCESS	15	1	0.0544043	AK3
GO_NEGATIVE_REGULATION_OF_NEUROLOGICAL_SYSTEM_PROCESS	15	1	0.0544043	IFNG
GO_REGULATION_OF_HEAT_GENERATION	15	1	0.0544043	APLN
GO_INTERLEUKIN_1_PRODUCTION	15	1	0.0544043	GBP5
GO_GLANDULAR_EPITHELIAL_CELL_DEVELOPMENT	15	1	0.0544043	RFX3
GO_JAK_STAT_CASCADE_INVOLVED_IN_GROWTH_HORMONE_SIGNALING_PATHWAY	15	1	0.0544043	JAK2
GO_NEGATIVE_REGULATION_OF_B_CELL_PROLIFERATION	15	1	0.0544043	CDKN2A
GO_RESPONSE_TO_HYDROPEROXIDE	15	1	0.0544043	JAK2
GO_POSITIVE_REGULATION_OF_T_CELL_APOPTOTIC_PROCESS	15	1	0.0544043	IDO1
GO_POSITIVE_REGULATION_OF_MONOCYTE_CHEMOTAXIS	15	1	0.0544043	CXCL10
GO_PRONUCLEUS	15	1	0.0544043	CENPF
GO_DNA_N_GLYCOSYLASE_ACTIVITY	15	1	0.0544043	NEIL3
GO_SUMO_TRANSFERASE_ACTIVITY	15	1	0.0544043	CDKN2A
GO_REGULATION_OF_TRANSPORT	1744	11	0.0547191	APLN, CCL4, CD274, CDKN2A, CXCL10, CXCL11, GTSE1, IFNG, JAK2, KANK1, RFX3
GO_DOUBLE_STRANDED_DNA_BINDING	735	6	0.0547824	DMRT3, KIF2C, MYBL2, NEIL3, NFIB, RFX3
GO_REGULATION_OF_DEFENSE_RESPONSE	736	6	0.0550772	CCL4, CCL8, GBP5, IDO1, IFNG, JAK2
GO_REGULATION_OF_T_CELL_DIFFERENTIATION	102	2	0.0553204	CDKN2A, IFNG
GO_POSITIVE_REGULATION_OF_PROTEIN_IMPORT	102	2	0.0553204	JAK2, KANK1
GO_INNATE_IMMUNE_RESPONSE	556	5	0.0553985	CCL4, CCL8, GBP5, IFNG, JAK2
GO_REGULATION_OF_SEQUESTERING_OF_CALCIUM_ION	104	2	0.0572539	CXCL10, CXCL11
GO_REGULATION_OF_B_CELL_ACTIVATION	104	2	0.0572539	CDKN2A, IFNG
GO_MODULATION_OF_GROWTH_OF_SYMBIONT_INVOLVED_IN_INTERACTION_WITH_HOST	16	1	0.0579259	IFNG
GO_NEGATIVE_REGULATION_OF_MYOTUBE_DIFFERENTIATION	16	1	0.0579259	CXCL10
GO_REGULATION_OF_TOLERANCE_INDUCTION	16	1	0.0579259	IDO1
GO_NEGATIVE_REGULATION_OF_STEM_CELL_PROLIFERATION	16	1	0.0579259	NFIB
GO_POSITIVE_REGULATION_OF_PHOSPHOPROTEIN_PHOSPHATASE_ACTIVITY	16	1	0.0579259	JAK2
GO_NEGATIVE_REGULATION_OF_T_CELL_APOPTOTIC_PROCESS	16	1	0.0579259	IDO1
GO_REGULATION_OF_INTERLEUKIN_6_BIOSYNTHETIC_PROCESS	16	1	0.0579259	IFNG
GO_POSITIVE_REGULATION_OF_TYROSINE_PHOSPHORYLATION_OF_STAT5_PROTEIN	16	1	0.0579259	JAK2
GO_REGULATION_OF_TYROSINE_PHOSPHORYLATION_OF_STAT1_PROTEIN	16	1	0.0579259	IFNG
GO_NEGATIVE_REGULATION_OF_STRIATED_MUSCLE_CELL_APOPTOTIC_PROCESS	16	1	0.0579259	JAK2
GO_POSITIVE_REGULATION_OF_MULTICELLULAR_ORGANISMAL_PROCESS	1341	9	0.0584998	APLN, ASPM, CD274, CDC20, GBP5, IDO1, IFNG, JAK2, RFX3
GO_POSITIVE_REGULATION_OF_INTRACELLULAR_PROTEIN_TRANSPORT	239	3	0.0593855	GTSE1, JAK2, KANK1
GO_PROTEIN_TARGETING	396	4	0.0596371	IFNG, JAK2, RANBP6, TOMM5
GO_POSITIVE_REGULATION_OF_CYCLIC_NUCLEOTIDE_METABOLIC_PROCESS	107	2	0.0601981	CXCL10, CXCL11
GO_REGULATION_OF_KINASE_ACTIVITY	755	6	0.0608633	CDKN2A, CLSPN, CXCL10, JAK2, PLK1, TPX2
GO_REGULATION_OF_ORGAN_MORPHOGENESIS	242	3	0.0611875	DMRT3, IFNG, NFIB
GO_POSITIVE_REGULATION_OF_LIGASE_ACTIVITY	108	2	0.061191	CDC20, PLK1
GO_INDOLALKYLAMINE_METABOLIC_PROCESS	17	1	0.0614347	IDO1
GO_POSITIVE_REGULATION_OF_SIGNAL_TRANSDUCTION_BY_P53_CLASS_MEDIATOR	17	1	0.0614347	CDKN2A
GO_GLYCINE_METABOLIC_PROCESS	17	1	0.0614347	GLDC
GO_REGULATION_OF_EXOSOMAL_SECRETION	17	1	0.0614347	IFNG
GO_ENTEROENDOCRINE_CELL_DIFFERENTIATION	17	1	0.0614347	RFX3
GO_POSITIVE_REGULATION_OF_CYSTEINE_TYPE_ENDOPEPTIDASE_ACTIVITY_INVOLVED_IN_APOPTOTIC_SIGNALING_PATHWAY	17	1	0.0614347	JAK2
GO_MRNA_CIS_SPLICING_VIA_SPLICEOSOME	17	1	0.0614347	PSIP1
GO_REGULATION_OF_PRI_MIRNA_TRANSCRIPTION_FROM_RNA_POLYMERASE_II_PROMOTER	17	1	0.0614347	NFIB
GO_REGULATION_OF_UBIQUITIN_PROTEIN_LIGASE_ACTIVITY	17	1	0.0614347	PLK1
GO_CENTROSOME_LOCALIZATION	17	1	0.0614347	ASPM
GO_PEPTIDE_HORMONE_RECEPTOR_BINDING	17	1	0.0614347	JAK2
GO_CELLULAR_AMINO_ACID_CATABOLIC_PROCESS	109	2	0.0621895	GLDC, IDO1
GO_SECRETION	575	5	0.0622147	APLN, CA9, CCL8, CDC37L1, GBP5
GO_RESPONSE_TO_INTERLEUKIN_1	110	2	0.0631937	CCL4, CCL8
GO_ZYMOGEN_ACTIVATION	110	2	0.0631937	CDKN2A, JAK2
GO_ELECTRON_CARRIER_ACTIVITY	110	2	0.0631937	GLDC, IDO1
GO_NEGATIVE_REGULATION_OF_CELL_DIFFERENTIATION	578	5	0.0633331	ASPM, CDKN2A, CXCL10, IFNG, KANK1
GO_NEGATIVE_REGULATION_OF_DEVELOPMENTAL_PROCESS	763	6	0.0634055	ASPM, CDKN2A, CXCL10, IFNG, KANK1, NFIB
GO_POSITIVE_REGULATION_OF_HORMONE_SECRETION	111	2	0.0642033	APLN, JAK2
GO_REGULATION_OF_CYTOKINE_PRODUCTION_INVOLVED_IN_INFLAMMATORY_RESPONSE	18	1	0.0649306	GBP5
GO_CHROMOSOME_SEPARATION	18	1	0.0649306	TTK
GO_MITOTIC_G2_M_TRANSITION_CHECKPOINT	18	1	0.0649306	CLSPN
GO_EPITHELIAL_CILIUM_MOVEMENT	18	1	0.0649306	RFX3
GO_REGULATION_OF_NITRIC_OXIDE_SYNTHASE_BIOSYNTHETIC_PROCESS	18	1	0.0649306	JAK2
GO_POSITIVE_REGULATION_OF_DNA_RECOMBINATION	18	1	0.0649306	IFNG
GO_ATP_DEPENDENT_MICROTUBULE_MOTOR_ACTIVITY	18	1	0.0649306	KIF18B
GO_OXIDOREDUCTASE_ACTIVITY_ACTING_ON_THE_CH_NH2_GROUP_OF_DONORS	18	1	0.0649306	GLDC
GO_REGULATION_OF_CALCIUM_ION_TRANSMEMBRANE_TRANSPORT	112	2	0.0652185	CXCL10, CXCL11
GO_PROTEIN_SUMOYLATION	112	2	0.0652185	CDCA8, CDKN2A
GO_NEGATIVE_REGULATION_OF_NERVOUS_SYSTEM_DEVELOPMENT	252	3	0.0673782	ASPM, IFNG, KANK1
GO_MAMMARY_GLAND_DEVELOPMENT	115	2	0.0682964	APLN, JAK2
GO_CLEAVAGE_INVOLVED_IN_RRNA_PROCESSING	19	1	0.0684137	RCL1
GO_ESTABLISHMENT_OF_MITOTIC_SPINDLE_ORIENTATION	19	1	0.0684137	CENPA
GO_NEURONAL_STEM_CELL_POPULATION_MAINTENANCE	19	1	0.0684137	ASPM
GO_REGULATION_OF_MYOBLAST_FUSION	19	1	0.0684137	CXCL10
GO_POSITIVE_REGULATION_OF_PROTEIN_EXPORT_FROM_NUCLEUS	19	1	0.0684137	GTSE1
GO_MICROVILLUS_MEMBRANE	19	1	0.0684137	CA9
GO_TRANSCRIPTIONALLY_ACTIVE_CHROMATIN	19	1	0.0684137	PSIP1
GO_HISTONE_KINASE_ACTIVITY	19	1	0.0684137	JAK2
GO_REGULATION_OF_IMMUNE_RESPONSE	782	6	0.0696956	FCGR3A, GBP5, IDO1, IFNG, JAK2, KIR2DL4
GO_POSITIVE_REGULATION_OF_CELL_DEATH	595	5	0.0698872	CDKN2A, IDO1, IFNG, JAK2, MELK
GO_CYTOKINE_PRODUCTION	117	2	0.0703749	GBP5, IDO1
GO_POSITIVE_REGULATION_OF_PROTEIN_CATABOLIC_PROCESS	257	3	0.0705778	CDC20, IFNG, PLK1
GO_REGULATION_OF_EPITHELIAL_CELL_DIFFERENTIATION	118	2	0.0714219	IFNG, RFX3
GO_STRUCTURE_SPECIFIC_DNA_BINDING	118	2	0.0714219	NEIL3, PSIP1
GO_POSITIVE_REGULATION_OF_TRANSFERASE_ACTIVITY	599	5	0.0714827	CDC20, CLSPN, JAK2, PLK1, TPX2
GO_SEX_DIFFERENTIATION	259	3	0.0718768	ASPM, CENPI, DMRT3
GO_POSITIVE_REGULATION_OF_LYMPHOCYTE_APOPTOTIC_PROCESS	20	1	0.0718841	IDO1
GO_REGULATION_OF_PROTEIN_SUMOYLATION	20	1	0.0718841	CDKN2A
GO_SYNAPTONEMAL_COMPLEX_ORGANIZATION	20	1	0.0718841	PLK1
GO_CELLULAR_RESPONSE_TO_GROWTH_HORMONE_STIMULUS	20	1	0.0718841	JAK2
GO_RESPONSE_TO_PROTOZOAN	20	1	0.0718841	IFNG
GO_REGULATION_OF_MEMBRANE_PROTEIN_ECTODOMAIN_PROTEOLYSIS	20	1	0.0718841	IFNG
GO_REGULATION_OF_TYROSINE_PHOSPHORYLATION_OF_STAT5_PROTEIN	20	1	0.0718841	JAK2
GO_AROMATIC_AMINO_ACID_FAMILY_CATABOLIC_PROCESS	20	1	0.0718841	IDO1
GO_REGULATION_OF_STRIATED_MUSCLE_CELL_APOPTOTIC_PROCESS	20	1	0.0718841	JAK2
GO_REGULATION_OF_MONOCYTE_CHEMOTAXIS	20	1	0.0718841	CXCL10
GO_ANAPHASE_PROMOTING_COMPLEX	20	1	0.0718841	CDC20
GO_PLATELET_DENSE_GRANULE	20	1	0.0718841	CDC37L1
GO_CYCLASE_ACTIVITY	20	1	0.0718841	RCL1
GO_NUCLEAR_LOCALIZATION_SEQUENCE_BINDING	20	1	0.0718841	RANBP6
GO_REGULATION_OF_INTRACELLULAR_SIGNAL_TRANSDUCTION	1612	10	0.0723599	CCL4, CCL8, CDKN2A, CXCL10, CXCL11, FAM83D, IFNG, JAK2, KANK1, TPX2
GO_ESTABLISHMENT_OF_LOCALIZATION_IN_CELL	1614	10	0.0728409	CDCA8, CENPA, CENPF, FAM83D, IFNG, JAK2, KIF2C, PSIP1, RANBP6, TOMM5
GO_DNA_CONFORMATION_CHANGE	261	3	0.0731866	CDKN2A, CENPA, CENPI
GO_ENDONUCLEASE_ACTIVITY	120	2	0.0735312	NEIL3, RCL1
GO_CELLULAR_MACROMOLECULE_LOCALIZATION	1194	8	0.073566	CENPA, CNTLN, FAM83D, IFNG, JAK2, PLK1, RANBP6, TOMM5
GO_PROTEASOMAL_PROTEIN_CATABOLIC_PROCESS	264	3	0.0751716	CDC20, GTSE1, PLK1
GO_REGULATION_OF_PROTEIN_IMPORT_INTO_NUCLEUS_TRANSLOCATION	21	1	0.0753417	JAK2
GO_REGULATION_OF_RUFFLE_ASSEMBLY	21	1	0.0753417	KANK1
GO_POSITIVE_REGULATION_OF_NEUROBLAST_PROLIFERATION	21	1	0.0753417	ASPM
GO_REGULATION_OF_CHROMATIN_SILENCING	21	1	0.0753417	UHRF2
GO_NEGATIVE_REGULATION_OF_HEART_CONTRACTION	21	1	0.0753417	JAK2
GO_SPINAL_CORD_PATTERNING	21	1	0.0753417	DMRT3
GO_PYRIMIDINE_NUCLEOSIDE_TRIPHOSPHATE_METABOLIC_PROCESS	21	1	0.0753417	AK3
GO_ACTIN_FILAMENT_POLYMERIZATION	21	1	0.0753417	JAK2
GO_CELLULAR_BIOGENIC_AMINE_CATABOLIC_PROCESS	21	1	0.0753417	IDO1
GO_REGULATION_OF_ESTABLISHMENT_OR_MAINTENANCE_OF_CELL_POLARITY	21	1	0.0753417	KANK1
GO_REGULATION_OF_PEPTIDYL_SERINE_PHOSPHORYLATION_OF_STAT_PROTEIN	21	1	0.0753417	IFNG
GO_AMINE_CATABOLIC_PROCESS	21	1	0.0753417	IDO1
GO_POSITIVE_REGULATION_OF_PEPTIDYL_SERINE_PHOSPHORYLATION_OF_STAT_PROTEIN	21	1	0.0753417	IFNG
GO_REGULATION_OF_PHOSPHATASE_ACTIVITY	122	2	0.0756606	IFNG, JAK2
GO_POSITIVE_REGULATION_OF_TRANSMEMBRANE_TRANSPORT	124	2	0.0778097	CXCL10, CXCL11
GO_POSITIVE_REGULATION_OF_ALCOHOL_BIOSYNTHETIC_PROCESS	22	1	0.0787867	IFNG
GO_AXON_REGENERATION	22	1	0.0787867	JAK2
GO_MODULATION_OF_TRANSCRIPTION_IN_OTHER_ORGANISM_INVOLVED_IN_SYMBIOTIC_INTERACTION	22	1	0.0787867	CCL4
GO_CENTRAL_NERVOUS_SYSTEM_PROJECTION_NEURON_AXONOGENESIS	22	1	0.0787867	NFIB
GO_LEUKOCYTE_APOPTOTIC_PROCESS	22	1	0.0787867	IFNG
GO_REGULATION_OF_CYSTEINE_TYPE_ENDOPEPTIDASE_ACTIVITY_INVOLVED_IN_APOPTOTIC_SIGNALING_PATHWAY	22	1	0.0787867	JAK2
GO_REGULATION_OF_INTERLEUKIN_17_PRODUCTION	22	1	0.0787867	IFNG
GO_NLS_BEARING_PROTEIN_IMPORT_INTO_NUCLEUS	22	1	0.0787867	RANBP6
GO_GTP_METABOLIC_PROCESS	22	1	0.0787867	AK3
GO_REGULATION_OF_RESPIRATORY_GASEOUS_EXCHANGE	22	1	0.0787867	APLN
GO_POSITIVE_REGULATION_OF_CHROMOSOME_SEGREGATION	22	1	0.0787867	PLK1
GO_IMMUNOGLOBULIN_BINDING	22	1	0.0787867	FCGR3A
GO_HYDROLASE_ACTIVITY_HYDROLYZING_N_GLYCOSYL_COMPOUNDS	22	1	0.0787867	NEIL3
GO_NEGATIVE_REGULATION_OF_PROTEIN_SERINE_THREONINE_KINASE_ACTIVITY	125	2	0.0788916	CDKN2A, PLK1
GO_REGULATION_OF_REPRODUCTIVE_PROCESS	126	2	0.0799781	ASPM, CDC20
GO_REGULATION_OF_PROTEIN_MODIFICATION_BY_SMALL_PROTEIN_CONJUGATION_OR_REMOVAL	272	3	0.0805814	CDC20, CDKN2A, PLK1
GO_NEGATIVE_REGULATION_OF_GENE_EXPRESSION	1430	9	0.080772	CCL4, CDKN2A, CENPF, DEPDC1, GLIS3, IFNG, NFIB, PLK1, RFX3
GO_REGULATION_OF_LYMPHOCYTE_DIFFERENTIATION	127	2	0.0810695	CDKN2A, IFNG
GO_REGULATION_OF_CAMP_METABOLIC_PROCESS	127	2	0.0810695	CXCL10, CXCL11
GO_IMMUNE_EFFECTOR_PROCESS	442	4	0.0819489	CXCL10, FCGR3A, IFI44L, IFNG
GO_ACTIVATION_OF_PROTEIN_KINASE_ACTIVITY	274	3	0.08196	CLSPN, JAK2, TPX2
GO_PROTEIN_UBIQUITINATION_INVOLVED_IN_UBIQUITIN_DEPENDENT_PROTEIN_CATABOLIC_PROCESS	128	2	0.0821654	CDC20, PLK1
GO_REGULATION_OF_MYELOID_CELL_APOPTOTIC_PROCESS	23	1	0.0822191	CDKN2A
GO_POSITIVE_REGULATION_OF_OSTEOCLAST_DIFFERENTIATION	23	1	0.0822191	IFNG
GO_REGULATION_OF_SYNCYTIUM_FORMATION_BY_PLASMA_MEMBRANE_FUSION	23	1	0.0822191	CXCL10
GO_PYRIMIDINE_RIBONUCLEOTIDE_METABOLIC_PROCESS	23	1	0.0822191	AK3
GO_NEGATIVE_REGULATION_OF_MYOBLAST_DIFFERENTIATION	23	1	0.0822191	CXCL10
GO_RESPONSE_TO_AUDITORY_STIMULUS	23	1	0.0822191	CXCL10
GO_ESTABLISHMENT_OF_MITOTIC_SPINDLE_LOCALIZATION	23	1	0.0822191	CENPA
GO_POSITIVE_REGULATION_OF_STEROID_METABOLIC_PROCESS	23	1	0.0822191	IFNG
GO_HISTONE_DEMETHYLASE_ACTIVITY	23	1	0.0822191	KDM4C
GO_CHROMATIN_ORGANIZATION	627	5	0.083216	CDKN2A, CENPA, CENPI, JAK2, KDM4C
GO_PROTEIN_KINASE_ACTIVITY	629	5	0.0840917	CCL8, JAK2, MELK, PLK1, TTK
GO_KINASE_ACTIVITY	822	6	0.0840983	AK3, CCL8, JAK2, MELK, PLK1, TTK
GO_POSITIVE_REGULATION_OF_PURINE_NUCLEOTIDE_METABOLIC_PROCESS	130	2	0.0843712	CXCL10, CXCL11
GO_POSITIVE_REGULATION_OF_NUCLEOTIDE_METABOLIC_PROCESS	130	2	0.0843712	CXCL10, CXCL11
GO_TRANSCRIPTION_FACTOR_ACTIVITY_RNA_POLYMERASE_II_TRANSCRIPTION_FACTOR_BINDING	130	2	0.0843712	NFIB, PSIP1
GO_TETRAPYRROLE_BINDING	131	2	0.085481	IDO1, JAK2
GO_NEGATIVE_REGULATION_OF_STRIATED_MUSCLE_CELL_DIFFERENTIATION	24	1	0.0856389	CXCL10
GO_LUNG_CELL_DIFFERENTIATION	24	1	0.0856389	NFIB
GO_POSITIVE_REGULATION_OF_INTERLEUKIN_1_SECRETION	24	1	0.0856389	IFNG
GO_REGULATION_OF_ODONTOGENESIS	24	1	0.0856389	DMRT3
GO_POSITIVE_REGULATION_OF_PEPTIDYL_THREONINE_PHOSPHORYLATION	24	1	0.0856389	PLK1
GO_REGULATION_OF_ISOTYPE_SWITCHING	24	1	0.0856389	IFNG
GO_BENZENE_CONTAINING_COMPOUND_METABOLIC_PROCESS	24	1	0.0856389	IDO1
GO_NEGATIVE_REGULATION_OF_CELL_CYCLE_G2_M_PHASE_TRANSITION	24	1	0.0856389	CLSPN
GO_FEMALE_MEIOTIC_DIVISION	24	1	0.0856389	PLK1
GO_NEGATIVE_REGULATION_OF_VIRAL_TRANSCRIPTION	24	1	0.0856389	CCL4
GO_REGULATION_OF_EXECUTION_PHASE_OF_APOPTOSIS	24	1	0.0856389	CDKN2A
GO_REGULATION_OF_T_CELL_MIGRATION	24	1	0.0856389	CXCL10
GO_DNA_SECONDARY_STRUCTURE_BINDING	24	1	0.0856389	NEIL3
GO_NUCLEOTIDE_KINASE_ACTIVITY	24	1	0.0856389	AK3
GO_NEGATIVE_REGULATION_OF_NITROGEN_COMPOUND_METABOLIC_PROCESS	1455	9	0.0878645	CCL4, CDKN2A, CENPF, DEPDC1, GLIS3, IFNG, NFIB, PLK1, RFX3
GO_NEGATIVE_REGULATION_OF_PROTEIN_MODIFICATION_BY_SMALL_PROTEIN_CONJUGATION_OR_REMOVAL	134	2	0.0888368	CDC20, CDKN2A
GO_ESTABLISHMENT_OF_SPINDLE_ORIENTATION	25	1	0.0890462	CENPA
GO_REGULATION_OF_TYPE_2_IMMUNE_RESPONSE	25	1	0.0890462	IDO1
GO_REGULATION_OF_T_CELL_DIFFERENTIATION_IN_THYMUS	25	1	0.0890462	CDKN2A
GO_REGULATION_OF_THYMOCYTE_AGGREGATION	25	1	0.0890462	CDKN2A
GO_HISTONE_PHOSPHORYLATION	25	1	0.0890462	JAK2
GO_ENDOSOME_LUMEN	25	1	0.0890462	JAK2
GO_RNA_POLYMERASE_II_TRANSCRIPTION_COREPRESSOR_ACTIVITY	25	1	0.0890462	NFIB
GO_DYNEIN_BINDING	25	1	0.0890462	CENPF
GO_APOPTOTIC_SIGNALING_PATHWAY	286	3	0.0904456	IFNG, JAK2, MELK
GO_MRNA_SPLICE_SITE_SELECTION	26	1	0.092441	PSIP1
GO_REGULATION_OF_CELLULAR_SENESCENCE	26	1	0.092441	CDKN2A
GO_PROTEIN_DEALKYLATION	26	1	0.092441	KDM4C
GO_POSITIVE_REGULATION_OF_B_CELL_MEDIATED_IMMUNITY	26	1	0.092441	IFNG
GO_VENTRICULAR_SYSTEM_DEVELOPMENT	26	1	0.092441	CENPF
GO_PROTEIN_DEMETHYLATION	26	1	0.092441	KDM4C
GO_INDOLE_CONTAINING_COMPOUND_METABOLIC_PROCESS	26	1	0.092441	IDO1
GO_POSITIVE_REGULATION_OF_IMMUNOGLOBULIN_MEDIATED_IMMUNE_RESPONSE	26	1	0.092441	IFNG
GO_OXIDOREDUCTASE_ACTIVITY_ACTING_ON_SINGLE_DONORS_WITH_INCORPORATION_OF_MOLECULAR_OXYGEN	26	1	0.092441	IDO1
GO_REGULATION_OF_BLOOD_CIRCULATION	289	3	0.0926231	APLN, IFNG, JAK2
GO_REGULATION_OF_PROTEIN_TARGETING	290	3	0.0933539	CDKN2A, JAK2, KANK1
GO_MICROTUBULE_ORGANIZING_CENTER_PART	138	2	0.0933719	CNTLN, KIF24
GO_REGULATION_OF_HORMONE_LEVELS	464	4	0.0939044	APLN, IFNG, JAK2, RFX3
GO_REGULATION_OF_CELL_CYCLE_G1_S_PHASE_TRANSITION	140	2	0.0956646	FAM83D, GTSE1
GO_REGULATION_OF_RESPONSE_TO_CYTOKINE_STIMULUS	140	2	0.0956646	IFNG, JAK2
GO_REGULATION_OF_DNA_DAMAGE_RESPONSE_SIGNAL_TRANSDUCTION_BY_P53_CLASS_MEDIATOR	27	1	0.0958233	CDKN2A
GO_POSITIVE_REGULATION_OF_CD4_POSITIVE_ALPHA_BETA_T_CELL_ACTIVATION	27	1	0.0958233	IFNG
GO_NEGATIVE_REGULATION_OF_LYMPHOCYTE_APOPTOTIC_PROCESS	27	1	0.0958233	IDO1
GO_REGULATION_OF_CATENIN_IMPORT_INTO_NUCLEUS	27	1	0.0958233	KANK1
GO_CENTRAL_NERVOUS_SYSTEM_NEURON_AXONOGENESIS	27	1	0.0958233	NFIB
GO_NEUROPEPTIDE_RECEPTOR_BINDING	27	1	0.0958233	APLN
GO_REGULATION_OF_CYTOKINE_SECRETION	141	2	0.0968171	CD274, IFNG
GO_RESPONSE_TO_TEMPERATURE_STIMULUS	141	2	0.0968171	CXCL10, PSIP1
GO_MEIOTIC_CELL_CYCLE_PROCESS	141	2	0.0968171	ASPM, PLK1
GO_CELL_CYCLE_ARREST	143	2	0.099134	CDKN2A, IFNG
GO_REGULATION_OF_JAK_STAT_CASCADE	143	2	0.099134	IFNG, JAK2
GO_REGULATION_OF_STAT_CASCADE	143	2	0.099134	IFNG, JAK2
GO_MALE_SEX_DIFFERENTIATION	143	2	0.099134	ASPM, DMRT3
GO_PROTEIN_LOCALIZATION_TO_CYTOSKELETON	28	1	0.0991933	FAM83D
GO_NEGATIVE_REGULATION_OF_CELL_MATRIX_ADHESION	28	1	0.0991933	CDKN2A
GO_AROMATIC_AMINO_ACID_FAMILY_METABOLIC_PROCESS	28	1	0.0991933	IDO1
GO_NEURON_FATE_SPECIFICATION	28	1	0.0991933	DMRT3
GO_GLYOXYLATE_METABOLIC_PROCESS	28	1	0.0991933	GLDC
GO_REGULATION_OF_NEUROBLAST_PROLIFERATION	28	1	0.0991933	ASPM
GO_POSITIVE_REGULATION_OF_MONOOXYGENASE_ACTIVITY	28	1	0.0991933	IFNG
GO_POSITIVE_REGULATION_OF_CELL_CYCLE_G1_S_PHASE_TRANSITION	28	1	0.0991933	FAM83D
GO_CYCLIN_DEPENDENT_PROTEIN_SERINE_THREONINE_KINASE_REGULATOR_ACTIVITY	28	1	0.0991933	CDKN2A
GO_RESPONSE_TO_LIPID	865	6	0.101319	CA9, CXCL10, CXCL11, IDO1, IFNG, JAK2
GO_NEGATIVE_REGULATION_OF_MULTI_ORGANISM_PROCESS	145	2	0.101467	CCL4, IFNG
GO_REGULATION_OF_MEIOTIC_NUCLEAR_DIVISION	29	1	0.102551	CDC20
GO_REGULATION_OF_MYELINATION	29	1	0.102551	IFNG
GO_NEGATIVE_REGULATION_OF_MUSCLE_CELL_APOPTOTIC_PROCESS	29	1	0.102551	JAK2
GO_T_CELL_DIFFERENTIATION_INVOLVED_IN_IMMUNE_RESPONSE	29	1	0.102551	IFNG
GO_POSITIVE_REGULATION_OF_INTERLEUKIN_10_PRODUCTION	29	1	0.102551	CD274
GO_NEUROBLAST_PROLIFERATION	29	1	0.102551	ASPM
GO_SH2_DOMAIN_BINDING	29	1	0.102551	JAK2
GO_PEPTIDYL_SERINE_MODIFICATION	146	2	0.102639	CLSPN, PLK1
GO_REGULATION_OF_REACTIVE_OXYGEN_SPECIES_METABOLIC_PROCESS	147	2	0.103815	IFNG, JAK2
GO_NEGATIVE_REGULATION_OF_B_CELL_ACTIVATION	30	1	0.105896	CDKN2A
GO_RESPONSE_TO_GROWTH_HORMONE	30	1	0.105896	JAK2
GO_POSITIVE_REGULATION_OF_IMMUNOGLOBULIN_PRODUCTION	30	1	0.105896	IFNG
GO_PROTEIN_SERINE_THREONINE_KINASE_INHIBITOR_ACTIVITY	30	1	0.105896	CDKN2A
GO_PHOSPHATIDYLINOSITOL_3_KINASE_BINDING	30	1	0.105896	JAK2
GO_NF_KAPPAB_BINDING	30	1	0.105896	CDKN2A
GO_POSITIVE_REGULATION_OF_MOLECULAR_FUNCTION	1737	10	0.106443	CCL4, CCL8, CDC20, CDKN2A, CLSPN, DEPDC1, IFNG, JAK2, PLK1, TPX2
GO_REGULATION_OF_SECRETION	677	5	0.106574	APLN, CD274, IFNG, JAK2, RFX3
GO_INTRINSIC_APOPTOTIC_SIGNALING_PATHWAY	150	2	0.107365	JAK2, MELK
GO_REGULATION_OF_DEPHOSPHORYLATION	150	2	0.107365	IFNG, JAK2
GO_POSITIVE_REGULATION_OF_WNT_SIGNALING_PATHWAY	150	2	0.107365	ASPM, KANK1
GO_PROTEIN_LOCALIZATION	1742	10	0.107977	CENPA, CENPF, CNTLN, FAM83D, GBP5, IFNG, JAK2, PLK1, RANBP6, TOMM5
GO_POSITIVE_REGULATION_OF_PEPTIDASE_ACTIVITY	151	2	0.108556	CDKN2A, JAK2
GO_POSITIVE_REGULATION_OF_HYDROLASE_ACTIVITY	882	6	0.108615	CCL4, CCL8, CDKN2A, DEPDC1, IFNG, JAK2
GO_POSITIVE_REGULATION_OF_DEVELOPMENTAL_PROCESS	1090	7	0.108648	ASPM, CDC20, CDKN2A, IDO1, IFNG, JAK2, RFX3
GO_MITOTIC_CYTOKINESIS	31	1	0.109229	PLK1
GO_SALIVARY_GLAND_DEVELOPMENT	31	1	0.109229	NFIB
GO_NEGATIVE_REGULATION_OF_CELLULAR_RESPONSE_TO_INSULIN_STIMULUS	31	1	0.109229	KANK1
GO_ADULT_WALKING_BEHAVIOR	31	1	0.109229	DMRT3
GO_PYRIMIDINE_RIBONUCLEOSIDE_METABOLIC_PROCESS	31	1	0.109229	AK3
GO_CELLULAR_SENESCENCE	31	1	0.109229	CDKN2A
GO_POSITIVE_REGULATION_OF_VASODILATION	31	1	0.109229	APLN
GO_NEURON_PROJECTION_REGENERATION	31	1	0.109229	JAK2
GO_NEGATIVE_REGULATION_OF_T_CELL_DIFFERENTIATION	31	1	0.109229	CDKN2A
GO_WALKING_BEHAVIOR	31	1	0.109229	DMRT3
GO_DEMETHYLASE_ACTIVITY	31	1	0.109229	KDM4C
GO_REGULATION_OF_METAL_ION_TRANSPORT	313	3	0.110811	CCL4, CXCL10, CXCL11
GO_REGULATION_OF_CYCLIC_NUCLEOTIDE_METABOLIC_PROCESS	153	2	0.110948	CXCL10, CXCL11
GO_CILIUM_MOVEMENT	32	1	0.11255	RFX3
GO_REGULATION_OF_TRANSCRIPTION_FROM_RNA_POLYMERASE_II_PROMOTER_IN_RESPONSE_TO_HYPOXIA	32	1	0.11255	CA9
GO_REGULATION_OF_INTERLEUKIN_1_SECRETION	32	1	0.11255	IFNG
GO_LUNG_EPITHELIUM_DEVELOPMENT	33	1	0.115859	NFIB
GO_MATURATION_OF_SSU_RRNA_FROM_TRICISTRONIC_RRNA_TRANSCRIPT_SSU_RRNA_5_8S_RRNA_LSU_RRNA_	33	1	0.115859	RCL1
GO_CELLULAR_RESPONSE_TO_HEAT	33	1	0.115859	CXCL10
GO_RESPONSE_TO_VITAMIN_D	33	1	0.115859	CXCL10
GO_REGULATION_OF_CELL_AGING	33	1	0.115859	CDKN2A
GO_SYNAPTONEMAL_COMPLEX	33	1	0.115859	PLK1
GO_CELLULAR_RESPONSE_TO_BIOTIC_STIMULUS	158	2	0.116989	CXCL10, IFNG
GO_POSITIVE_REGULATION_OF_PEPTIDYL_TYROSINE_PHOSPHORYLATION	158	2	0.116989	IFNG, JAK2
GO_REGULATION_OF_SIGNAL_TRANSDUCTION_BY_P53_CLASS_MEDIATOR	159	2	0.118207	CDKN2A, TPX2
GO_POSITIVE_REGULATION_OF_IMMUNE_RESPONSE	506	4	0.11889	FCGR3A, GBP5, IDO1, IFNG
GO_PLATELET_DERIVED_GROWTH_FACTOR_RECEPTOR_SIGNALING_PATHWAY	34	1	0.119155	JAK2
GO_REGULATION_OF_MESENCHYMAL_CELL_PROLIFERATION	34	1	0.119155	NFIB
GO_CENTRAL_NERVOUS_SYSTEM_NEURON_DIFFERENTIATION	161	2	0.120653	DMRT3, NFIB
GO_POSITIVE_REGULATION_OF_ERK1_AND_ERK2_CASCADE	162	2	0.121881	CCL4, CCL8
GO_HORMONE_RECEPTOR_BINDING	162	2	0.121881	JAK2, KDM4C
GO_NEGATIVE_REGULATION_OF_SMOOTH_MUSCLE_CELL_PROLIFERATION	35	1	0.12244	IFNG
GO_ACTIN_POLYMERIZATION_OR_DEPOLYMERIZATION	35	1	0.12244	JAK2
GO_REGULATION_OF_LAMELLIPODIUM_ORGANIZATION	35	1	0.12244	KANK1
GO_REGULATION_OF_PEPTIDYL_THREONINE_PHOSPHORYLATION	35	1	0.12244	PLK1
GO_POSITIVE_REGULATION_OF_CELL_KILLING	35	1	0.12244	IFNG
GO_GLANDULAR_EPITHELIAL_CELL_DIFFERENTIATION	35	1	0.12244	RFX3
GO_RNA_POLYMERASE_II_TRANSCRIPTION_COACTIVATOR_ACTIVITY	35	1	0.12244	PSIP1
GO_DNA_METABOLIC_PROCESS	711	5	0.124144	CENPF, CLSPN, NEIL3, NFIB, UHRF2
GO_POSITIVE_REGULATION_OF_PROTEIN_LOCALIZATION_TO_CELL_PERIPHERY	36	1	0.125712	IFNG
GO_ONE_CARBON_METABOLIC_PROCESS	36	1	0.125712	CA9
GO_TOXIN_TRANSPORT	36	1	0.125712	CD274
GO_POSITIVE_REGULATION_OF_PROTEIN_LOCALIZATION_TO_PLASMA_MEMBRANE	36	1	0.125712	IFNG
GO_NEGATIVE_REGULATION_OF_EPITHELIAL_CELL_DIFFERENTIATION	36	1	0.125712	IFNG
GO_PROTEIN_K63_LINKED_UBIQUITINATION	36	1	0.125712	CDKN2A
GO_REGULATION_OF_PROTEIN_BINDING	166	2	0.126824	GTSE1, PLK1
GO_RESPONSE_TO_TESTOSTERONE	37	1	0.128973	CA9
GO_ENDOCRINE_PANCREAS_DEVELOPMENT	37	1	0.128973	RFX3
GO_REGULATION_OF_CD4_POSITIVE_ALPHA_BETA_T_CELL_ACTIVATION	37	1	0.128973	IFNG
GO_POSITIVE_REGULATION_OF_TYROSINE_PHOSPHORYLATION_OF_STAT3_PROTEIN	37	1	0.128973	JAK2
GO_POSITIVE_REGULATION_OF_ALPHA_BETA_T_CELL_DIFFERENTIATION	37	1	0.128973	IFNG
GO_SIGNAL_SEQUENCE_BINDING	37	1	0.128973	RANBP6
GO_CILIUM_ORGANIZATION	168	2	0.129313	KIF24, RFX3
GO_HISTONE_BINDING	169	2	0.130562	JAK2, UHRF2
GO_PROTEIN_PHOSPHORYLATION	932	6	0.131621	CCL8, CLSPN, JAK2, MELK, PLK1, TTK
GO_HOMEOSTASIS_OF_NUMBER_OF_CELLS	170	2	0.131814	IFNG, JAK2
GO_POSITIVE_REGULATION_OF_CALCIUM_MEDIATED_SIGNALING	38	1	0.132221	CCL4
GO_REGULATION_OF_ACTION_POTENTIAL	38	1	0.132221	IFNG
GO_CYTOKINE_SECRETION	38	1	0.132221	GBP5
GO_PEPTIDYL_TYROSINE_AUTOPHOSPHORYLATION	38	1	0.132221	JAK2
GO_INTERCELLULAR_BRIDGE	38	1	0.132221	CDCA8
GO_PHOSPHOTRANSFERASE_ACTIVITY_PHOSPHATE_GROUP_AS_ACCEPTOR	38	1	0.132221	AK3
GO_REGULATION_OF_NEURON_DIFFERENTIATION	531	4	0.135019	ASPM, CDC20, IFNG, KANK1
GO_NEGATIVE_REGULATION_OF_SMALL_GTPASE_MEDIATED_SIGNAL_TRANSDUCTION	39	1	0.135458	KANK1
GO_BASE_EXCISION_REPAIR	39	1	0.135458	NEIL3
GO_LACTATION	39	1	0.135458	APLN
GO_CYTOSKELETON_DEPENDENT_CYTOKINESIS	39	1	0.135458	PLK1
GO_NEGATIVE_REGULATION_OF_LYMPHOCYTE_DIFFERENTIATION	39	1	0.135458	CDKN2A
GO_PROTEIN_SERINE_THREONINE_TYROSINE_KINASE_ACTIVITY	39	1	0.135458	TTK
GO_ANDROGEN_RECEPTOR_BINDING	39	1	0.135458	KDM4C
GO_MEIOTIC_CELL_CYCLE	174	2	0.13685	ASPM, PLK1
GO_NEGATIVE_REGULATION_OF_TRANSFERASE_ACTIVITY	345	3	0.137006	CDC20, CDKN2A, PLK1
GO_RESPONSE_TO_OXIDATIVE_STRESS	345	3	0.137006	JAK2, MELK, PSIP1
GO_REGULATION_OF_INNATE_IMMUNE_RESPONSE	346	3	0.137858	GBP5, IFNG, JAK2
GO_MATURATION_OF_SSU_RRNA	40	1	0.138682	RCL1
GO_NUCLEAR_UBIQUITIN_LIGASE_COMPLEX	40	1	0.138682	CDC20
GO_LOCOMOTORY_BEHAVIOR	177	2	0.140655	DMRT3, IDO1
GO_RESPONSE_TO_COLD	41	1	0.141895	CXCL10
GO_REGULATION_OF_B_CELL_MEDIATED_IMMUNITY	41	1	0.141895	IFNG
GO_POSITIVE_REGULATION_OF_NEURAL_PRECURSOR_CELL_PROLIFERATION	41	1	0.141895	ASPM
GO_CELLULAR_COMPONENT_DISASSEMBLY_INVOLVED_IN_EXECUTION_PHASE_OF_APOPTOSIS	41	1	0.141895	CLSPN
GO_SERINE_FAMILY_AMINO_ACID_METABOLIC_PROCESS	41	1	0.141895	GLDC
GO_NEGATIVE_REGULATION_OF_TUMOR_NECROSIS_FACTOR_SUPERFAMILY_CYTOKINE_PRODUCTION	41	1	0.141895	CD274
GO_STEREOCILIUM_BUNDLE	41	1	0.141895	IDO1
GO_REGULATION_OF_PROTEIN_IMPORT	179	2	0.143204	JAK2, KANK1
GO_PROTEIN_CATABOLIC_PROCESS	545	4	0.144429	CDC20, GTSE1, PLK1, UHRF2
GO_POSITIVE_REGULATION_OF_DNA_BINDING	42	1	0.145096	JAK2
GO_NEGATIVE_REGULATION_OF_LEUKOCYTE_APOPTOTIC_PROCESS	42	1	0.145096	IDO1
GO_REGULATION_OF_SUBSTRATE_ADHESION_DEPENDENT_CELL_SPREADING	42	1	0.145096	KANK1
GO_HOMOLOGOUS_CHROMOSOME_SEGREGATION	42	1	0.145096	PLK1
GO_CELLULAR_RESPONSE_TO_OXIDATIVE_STRESS	181	2	0.145764	JAK2, MELK
GO_KINASE_REGULATOR_ACTIVITY	181	2	0.145764	CDKN2A, CXCL10
GO_METALLOPEPTIDASE_ACTIVITY	181	2	0.145764	ADAMDEC1, ERMP1
GO_CELL_DEATH	963	6	0.146997	CDKN2A, CLSPN, IFNG, JAK2, MELK, TPX2
GO_TRANSFERASE_ACTIVITY_TRANSFERRING_PHOSPHORUS_CONTAINING_GROUPS	964	6	0.147506	AK3, CCL8, JAK2, MELK, PLK1, TTK
GO_REGULATION_OF_PROTEIN_COMPLEX_ASSEMBLY	358	3	0.148214	GBP5, KANK1, PLK1
GO_VENTRAL_SPINAL_CORD_DEVELOPMENT	43	1	0.148285	DMRT3
GO_EXOCRINE_SYSTEM_DEVELOPMENT	43	1	0.148285	NFIB
GO_COLUMNAR_CUBOIDAL_EPITHELIAL_CELL_DEVELOPMENT	43	1	0.148285	RFX3
GO_NEGATIVE_REGULATION_OF_BLOOD_PRESSURE	43	1	0.148285	APLN
GO_NEGATIVE_REGULATION_OF_ACTIN_FILAMENT_POLYMERIZATION	43	1	0.148285	KANK1
GO_REGULATION_OF_INSULIN_RECEPTOR_SIGNALING_PATHWAY	43	1	0.148285	KANK1
GO_CILIUM_MORPHOGENESIS	183	2	0.148333	KIF24, RFX3
GO_NEGATIVE_REGULATION_OF_NEURON_DIFFERENTIATION	185	2	0.150912	ASPM, KANK1
GO_MEMBRANE_DISASSEMBLY	44	1	0.151463	PLK1
GO_ALPHA_BETA_T_CELL_DIFFERENTIATION	44	1	0.151463	IFNG
GO_BICARBONATE_TRANSPORT	44	1	0.151463	CA9
GO_REGULATION_OF_TYROSINE_PHOSPHORYLATION_OF_STAT3_PROTEIN	44	1	0.151463	JAK2
GO_NUCLEAR_ENVELOPE_DISASSEMBLY	44	1	0.151463	PLK1
GO_REGULATION_OF_ALCOHOL_BIOSYNTHETIC_PROCESS	44	1	0.151463	IFNG
GO_REGULATION_OF_RESPONSE_TO_STRESS	1419	8	0.154235	CCL4, CCL8, CDKN2A, GBP5, IDO1, IFNG, JAK2, KANK1
GO_RECEPTOR_BINDING	1419	8	0.154235	APLN, CCL4, CCL8, CXCL10, CXCL11, IFNG, JAK2, KDM4C
GO_ADP_METABOLIC_PROCESS	45	1	0.154629	AK3
GO_GUANOSINE_CONTAINING_COMPOUND_METABOLIC_PROCESS	45	1	0.154629	AK3
GO_PYRIMIDINE_NUCLEOTIDE_METABOLIC_PROCESS	45	1	0.154629	AK3
GO_RESPONSE_TO_ANTIBIOTIC	45	1	0.154629	JAK2
GO_HYDRO_LYASE_ACTIVITY	45	1	0.154629	CA9
GO_REGULATION_OF_CELL_DIFFERENTIATION	1421	8	0.155099	ASPM, CDC20, CDKN2A, CXCL10, IFNG, JAK2, KANK1, RFX3
GO_POSITIVE_REGULATION_OF_CELLULAR_PROTEIN_CATABOLIC_PROCESS	189	2	0.156097	CDC20, PLK1
GO_ANTIGEN_PROCESSING_AND_PRESENTATION	189	2	0.156097	IFNG, KIF2C
GO_PROTEIN_AUTOPHOSPHORYLATION	190	2	0.157399	JAK2, MELK
GO_PHOSPHORYLATION	1203	7	0.157698	AK3, CCL8, CLSPN, JAK2, MELK, PLK1, TTK
GO_REGULATION_OF_VASODILATION	46	1	0.157783	APLN
GO_RESPONSE_TO_AXON_INJURY	46	1	0.157783	JAK2
GO_REGULATION_OF_IMMUNOGLOBULIN_PRODUCTION	46	1	0.157783	IFNG
GO_REGULATION_OF_MYOBLAST_DIFFERENTIATION	46	1	0.157783	CXCL10
GO_REGULATION_OF_ALPHA_BETA_T_CELL_DIFFERENTIATION	46	1	0.157783	IFNG
GO_POSITIVE_REGULATION_OF_OXIDOREDUCTASE_ACTIVITY	46	1	0.157783	IFNG
GO_POSITIVE_REGULATION_OF_WOUND_HEALING	46	1	0.157783	KANK1
GO_NUCLEOBASE_CONTAINING_COMPOUND_KINASE_ACTIVITY	46	1	0.157783	AK3
GO_NUCLEASE_ACTIVITY	192	2	0.160009	NEIL3, RCL1
GO_REGULATION_OF_ENDOCRINE_PROCESS	47	1	0.160926	APLN
GO_STAT_CASCADE	47	1	0.160926	JAK2
GO_JAK_STAT_CASCADE	47	1	0.160926	JAK2
GO_REGULATION_OF_ESTABLISHMENT_OF_PROTEIN_LOCALIZATION_TO_PLASMA_MEMBRANE	47	1	0.160926	IFNG
GO_PYRIMIDINE_NUCLEOSIDE_METABOLIC_PROCESS	47	1	0.160926	AK3
GO_POSITIVE_REGULATION_OF_MYELOID_LEUKOCYTE_DIFFERENTIATION	47	1	0.160926	IFNG
GO_PROTEIN_TARGETING_TO_MITOCHONDRION	47	1	0.160926	TOMM5
GO_ENDORIBONUCLEASE_ACTIVITY	47	1	0.160926	RCL1
GO_REGULATION_OF_SYMBIOSIS_ENCOMPASSING_MUTUALISM_THROUGH_PARASITISM	194	2	0.162627	CCL4, IFNG
GO_POSITIVE_REGULATION_OF_MITOTIC_NUCLEAR_DIVISION	48	1	0.164058	PLK1
GO_REGULATION_OF_STEROID_BIOSYNTHETIC_PROCESS	48	1	0.164058	IFNG
GO_POSITIVE_REGULATION_OF_PATHWAY_RESTRICTED_SMAD_PROTEIN_PHOSPHORYLATION	48	1	0.164058	TTK
GO_ENDODEOXYRIBONUCLEASE_ACTIVITY	48	1	0.164058	NEIL3
GO_POSITIVE_REGULATION_OF_GENE_EXPRESSION	1674	9	0.165572	CDKN2A, CXCL10, GLIS3, IFNG, JAK2, MYBL2, NFIB, PSIP1, RFX3
GO_REGULATION_OF_ION_HOMEOSTASIS	197	2	0.166569	CXCL10, CXCL11
GO_PROTEIN_AUTOUBIQUITINATION	49	1	0.167177	UHRF2
GO_POSITIVE_REGULATION_OF_CHEMOKINE_PRODUCTION	49	1	0.167177	IFNG
GO_RESPONSE_TO_GAMMA_RADIATION	49	1	0.167177	CXCL10
GO_POSITIVE_REGULATION_OF_ALPHA_BETA_T_CELL_ACTIVATION	49	1	0.167177	IFNG
GO_DNA_REPLICATION	198	2	0.167887	CLSPN, NFIB
GO_CELL_DIFFERENTIATION_IN_SPINAL_CORD	50	1	0.170286	DMRT3
GO_CARBOXYLIC_ACID_CATABOLIC_PROCESS	201	2	0.171851	GLDC, IDO1
GO_ORGANIC_ACID_CATABOLIC_PROCESS	201	2	0.171851	GLDC, IDO1
GO_CYTOSKELETAL_PROTEIN_BINDING	794	5	0.172238	FAM83D, KIF18B, KIF24, KIF2C, PLK1
GO_REGULATION_OF_CATION_TRANSMEMBRANE_TRANSPORT	202	2	0.173176	CXCL10, CXCL11
GO_GLAND_DEVELOPMENT	386	3	0.173318	APLN, JAK2, NFIB
GO_DEMETHYLATION	51	1	0.173383	KDM4C
GO_ALPHA_BETA_T_CELL_ACTIVATION	51	1	0.173383	IFNG
GO_REGULATION_OF_GENE_SILENCING	51	1	0.173383	UHRF2
GO_ACTIVATION_OF_MAPKK_ACTIVITY	51	1	0.173383	JAK2
GO_TRANSCRIPTIONAL_REPRESSOR_ACTIVITY_RNA_POLYMERASE_II_ACTIVATING_TRANSCRIPTION_FACTOR_BINDING	51	1	0.173383	PSIP1
GO_POSITIVE_REGULATION_OF_CATABOLIC_PROCESS	388	3	0.175157	CDC20, IFNG, PLK1
GO_NEGATIVE_REGULATION_OF_MUSCLE_CELL_DIFFERENTIATION	52	1	0.176468	CXCL10
GO_INTERACTION_WITH_SYMBIONT	52	1	0.176468	CCL4
GO_SPLICEOSOMAL_COMPLEX_ASSEMBLY	52	1	0.176468	PSIP1
GO_REGULATION_OF_CELL_DEVELOPMENT	802	5	0.177227	ASPM, CDC20, IFNG, KANK1, RFX3
GO_HYDROLASE_ACTIVITY_ACTING_ON_ACID_ANHYDRIDES	804	5	0.178483	GBP4, GBP5, KIF18B, KIF24, KIF2C
GO_REGULATION_OF_NUCLEOTIDE_METABOLIC_PROCESS	206	2	0.178494	CXCL10, CXCL11
GO_MAMMARY_GLAND_EPITHELIUM_DEVELOPMENT	53	1	0.179542	JAK2
GO_TRANSMISSION_OF_NERVE_IMPULSE	53	1	0.179542	DMRT3
GO_REGULATION_OF_MYOTUBE_DIFFERENTIATION	53	1	0.179542	CXCL10
GO_REGULATION_OF_MITOCHONDRIAL_MEMBRANE_POTENTIAL	53	1	0.179542	CDKN2A
GO_EXECUTION_PHASE_OF_APOPTOSIS	53	1	0.179542	CLSPN
GO_REGULATION_OF_PEPTIDYL_TYROSINE_PHOSPHORYLATION	208	2	0.181162	IFNG, JAK2
GO_REGULATION_OF_CYSTEINE_TYPE_ENDOPEPTIDASE_ACTIVITY	209	2	0.182499	CDKN2A, JAK2
GO_DEVELOPMENT_OF_PRIMARY_SEXUAL_CHARACTERISTICS	209	2	0.182499	ASPM, CENPI
GO_NEGATIVE_REGULATION_OF_PROTEIN_POLYMERIZATION	54	1	0.182605	KANK1
GO_POSITIVE_REGULATION_OF_EPITHELIAL_CELL_DIFFERENTIATION	55	1	0.185657	RFX3
GO_REGULATION_OF_DNA_RECOMBINATION	55	1	0.185657	IFNG
GO_RIBOSOMAL_SMALL_SUBUNIT_BIOGENESIS	55	1	0.185657	RCL1
GO_REGULATION_OF_B_CELL_PROLIFERATION	55	1	0.185657	CDKN2A
GO_APOPTOTIC_MITOCHONDRIAL_CHANGES	55	1	0.185657	CDKN2A
GO_EPITHELIAL_TO_MESENCHYMAL_TRANSITION	56	1	0.188698	FAM83D
GO_RNA_PHOSPHODIESTER_BOND_HYDROLYSIS_ENDONUCLEOLYTIC	56	1	0.188698	RCL1
GO_MICROTUBULE_BUNDLE_FORMATION	57	1	0.191727	PLK1
GO_REGULATION_OF_VIRAL_TRANSCRIPTION	57	1	0.191727	CCL4
GO_CELLULAR_DEFENSE_RESPONSE	57	1	0.191727	KIR2DL4
GO_ACTIVATING_TRANSCRIPTION_FACTOR_BINDING	57	1	0.191727	PSIP1
GO_NEGATIVE_REGULATION_OF_MOLECULAR_FUNCTION	1047	6	0.192555	CDC20, CDKN2A, GTSE1, JAK2, NFIB, PLK1
GO_RESPONSE_TO_EXTERNAL_STIMULUS	1739	9	0.193689	CCL4, CCL8, CXCL10, CXCL11, IDO1, IFI44L, IFNG, JAK2, NFIB
GO_PROTEIN_UBIQUITINATION	614	4	0.194312	CDC20, CDKN2A, PLK1, UHRF2
GO_MEIOTIC_CHROMOSOME_SEGREGATION	58	1	0.194745	PLK1
GO_PURINE_RIBONUCLEOSIDE_MONOPHOSPHATE_BIOSYNTHETIC_PROCESS	58	1	0.194745	AK3
GO_POSITIVE_REGULATION_OF_CYTOKINE_BIOSYNTHETIC_PROCESS	58	1	0.194745	IFNG
GO_PURINE_NUCLEOSIDE_MONOPHOSPHATE_BIOSYNTHETIC_PROCESS	58	1	0.194745	AK3
GO_REGULATION_OF_CELLULAR_RESPONSE_TO_INSULIN_STIMULUS	58	1	0.194745	KANK1
GO_POSITIVE_REGULATION_OF_RESPONSE_TO_DNA_DAMAGE_STIMULUS	58	1	0.194745	CDKN2A
GO_POSITIVE_REGULATION_OF_BIOSYNTHETIC_PROCESS	1742	9	0.195037	CDKN2A, CXCL10, GLIS3, IFNG, JAK2, MYBL2, NFIB, PSIP1, RFX3
GO_POSITIVE_REGULATION_OF_NERVOUS_SYSTEM_DEVELOPMENT	411	3	0.196693	ASPM, CDC20, IFNG
GO_ALPHA_AMINO_ACID_METABOLIC_PROCESS	220	2	0.197297	GLDC, IDO1
GO_MEMBRANE_DEPOLARIZATION	59	1	0.197752	CDKN2A
GO_PROTEIN_HOMOTETRAMERIZATION	59	1	0.197752	GBP5
GO_REGULATION_OF_MONOOXYGENASE_ACTIVITY	59	1	0.197752	IFNG
GO_POSITIVE_REGULATION_OF_INSULIN_SECRETION	59	1	0.197752	JAK2
GO_CHONDROCYTE_DIFFERENTIATION	59	1	0.197752	NFIB
GO_REGULATION_OF_PATHWAY_RESTRICTED_SMAD_PROTEIN_PHOSPHORYLATION	59	1	0.197752	TTK
GO_REGULATION_OF_PHOSPHOPROTEIN_PHOSPHATASE_ACTIVITY	59	1	0.197752	JAK2
GO_POSITIVE_REGULATION_OF_NUCLEAR_DIVISION	59	1	0.197752	PLK1
GO_POSITIVE_REGULATION_OF_PHOSPHATIDYLINOSITOL_3_KINASE_SIGNALING	59	1	0.197752	JAK2
GO_REGULATION_OF_CELL_KILLING	59	1	0.197752	IFNG
GO_LEUKOCYTE_HOMEOSTASIS	59	1	0.197752	IFNG
GO_REGULATION_OF_LEUKOCYTE_DIFFERENTIATION	221	2	0.198651	CDKN2A, IFNG
GO_PROTEIN_MODIFICATION_BY_SMALL_PROTEIN_CONJUGATION_OR_REMOVAL	836	5	0.199042	CDC20, CDCA8, CDKN2A, PLK1, UHRF2
GO_REGULATION_OF_OSTEOCLAST_DIFFERENTIATION	60	1	0.200748	IFNG
GO_T_CELL_ACTIVATION_INVOLVED_IN_IMMUNE_RESPONSE	60	1	0.200748	IFNG
GO_STEM_CELL_PROLIFERATION	60	1	0.200748	ASPM
GO_OVARIAN_FOLLICLE_DEVELOPMENT	60	1	0.200748	CENPI
GO_TRANSCRIPTIONAL_ACTIVATOR_ACTIVITY_RNA_POLYMERASE_II_CORE_PROMOTER_PROXIMAL_REGION_SEQUENCE_SPECIFIC_BINDING	223	2	0.201361	MYBL2, NFIB
GO_PERINUCLEAR_REGION_OF_CYTOPLASM	624	4	0.201966	APLN, CDC20, CENPF, GBP4
GO_TELENCEPHALON_DEVELOPMENT	224	2	0.202717	ASPM, NFIB
GO_POSITIVE_REGULATION_OF_STEM_CELL_PROLIFERATION	61	1	0.203734	ASPM
GO_CELLULAR_COMPONENT_ASSEMBLY_INVOLVED_IN_MORPHOGENESIS	225	2	0.204075	KIF24, RFX3
GO_RIBONUCLEOPROTEIN_COMPLEX_BIOGENESIS	419	3	0.204338	CDKN2A, PSIP1, RCL1
GO_CHROMATIN_BINDING	419	3	0.204338	CENPA, CENPF, PSIP1
GO_POSITIVE_REGULATION_OF_PRODUCTION_OF_MOLECULAR_MEDIATOR_OF_IMMUNE_RESPONSE	62	1	0.206708	IFNG
GO_NEURON_FATE_COMMITMENT	62	1	0.206708	DMRT3
GO_RIBONUCLEOSIDE_DIPHOSPHATE_METABOLIC_PROCESS	62	1	0.206708	AK3
GO_ATPASE_ACTIVITY	423	3	0.208186	KIF18B, KIF24, KIF2C
GO_OOGENESIS	63	1	0.209671	ASPM
GO_NEGATIVE_REGULATION_OF_NF_KAPPAB_TRANSCRIPTION_FACTOR_ACTIVITY	63	1	0.209671	CDKN2A
GO_DAMAGED_DNA_BINDING	63	1	0.209671	NEIL3
GO_RESPONSE_TO_DRUG	425	3	0.210117	CA9, CENPF, IFNG
GO_NEURAL_NUCLEUS_DEVELOPMENT	64	1	0.212623	NFIB
GO_REGULATION_OF_CHEMOKINE_PRODUCTION	64	1	0.212623	IFNG
GO_REGULATION_OF_NEUROLOGICAL_SYSTEM_PROCESS	64	1	0.212623	IFNG
GO_POSITIVE_REGULATION_OF_LIPID_BIOSYNTHETIC_PROCESS	64	1	0.212623	IFNG
GO_DEOXYRIBONUCLEASE_ACTIVITY	64	1	0.212623	NEIL3
GO_NEGATIVE_REGULATION_OF_GROWTH	232	2	0.213609	CDKN2A, IFNG
GO_REGULATION_OF_ALPHA_BETA_T_CELL_ACTIVATION	65	1	0.215565	IFNG
GO_FOREBRAIN_GENERATION_OF_NEURONS	65	1	0.215565	ASPM
GO_PROTEIN_POLYMERIZATION	65	1	0.215565	JAK2
GO_POSITIVE_REGULATION_OF_LYMPHOCYTE_MEDIATED_IMMUNITY	65	1	0.215565	IFNG
GO_REGULATION_OF_TOR_SIGNALING	65	1	0.215565	FAM83D
GO_REGULATION_OF_VASOCONSTRICTION	65	1	0.215565	APLN
GO_CELL_AGING	65	1	0.215565	CDKN2A
GO_REGULATION_OF_DNA_TEMPLATED_TRANSCRIPTION_IN_RESPONSE_TO_STRESS	65	1	0.215565	CA9
GO_PROTEIN_LOCALIZATION_TO_MITOCHONDRION	65	1	0.215565	TOMM5
GO_RESPONSE_TO_TOXIC_SUBSTANCE	234	2	0.216341	CCL4, JAK2
GO_REGULATION_OF_MAPK_CASCADE	644	4	0.217545	CCL4, CCL8, FAM83D, JAK2
GO_CELL_FATE_SPECIFICATION	66	1	0.218495	DMRT3
GO_P53_BINDING	66	1	0.218495	CDKN2A
GO_G_PROTEIN_COUPLED_RECEPTOR_SIGNALING_PATHWAY	1093	6	0.219632	CCL4, CCL8, CENPI, CXCL10, CXCL11, JAK2
GO_REGULATION_OF_HOMEOSTATIC_PROCESS	435	3	0.219833	APLN, CXCL10, CXCL11
GO_INTRACELLULAR_STEROID_HORMONE_RECEPTOR_SIGNALING_PATHWAY	67	1	0.221415	JAK2
GO_POSITIVE_REGULATION_OF_INTERLEUKIN_6_PRODUCTION	67	1	0.221415	IFNG
GO_GTPASE_ACTIVITY	238	2	0.221816	GBP4, GBP5
GO_PROTEIN_SERINE_THREONINE_KINASE_ACTIVITY	438	3	0.222766	MELK, PLK1, TTK
GO_CELLULAR_KETONE_METABOLIC_PROCESS	68	1	0.224325	IDO1
GO_MULTICELLULAR_ORGANISMAL_RESPONSE_TO_STRESS	68	1	0.224325	IDO1
GO_PANCREAS_DEVELOPMENT	68	1	0.224325	RFX3
GO_BODY_FLUID_SECRETION	68	1	0.224325	APLN
GO_REGULATION_OF_GTPASE_ACTIVITY	653	4	0.224666	CCL4, CCL8, DEPDC1, JAK2
GO_CELLULAR_RESPONSE_TO_LIPID	440	3	0.224727	CXCL10, IFNG, JAK2
GO_POSITIVE_REGULATION_OF_B_CELL_ACTIVATION	69	1	0.227223	IFNG
GO_CELLULAR_PROCESS_INVOLVED_IN_REPRODUCTION_IN_MULTICELLULAR_ORGANISM	242	2	0.227304	ASPM, CENPI
GO_CELL_PROJECTION_ASSEMBLY	243	2	0.228677	KIF24, RFX3
GO_POSITIVE_REGULATION_OF_ADAPTIVE_IMMUNE_RESPONSE	70	1	0.230111	IFNG
GO_ERYTHROCYTE_HOMEOSTASIS	70	1	0.230111	JAK2
GO_G1_DNA_DAMAGE_CHECKPOINT	70	1	0.230111	GTSE1
GO_CENTRAL_NERVOUS_SYSTEM_NEURON_DEVELOPMENT	70	1	0.230111	NFIB
GO_NEGATIVE_REGULATION_OF_KINASE_ACTIVITY	245	2	0.231426	CDKN2A, PLK1
GO_RRNA_METABOLIC_PROCESS	247	2	0.234177	CDKN2A, RCL1
GO_NEUROGENESIS	1351	7	0.234827	ASPM, CDC20, DMRT3, IFNG, JAK2, KANK1, NFIB
GO_ADAPTIVE_IMMUNE_RESPONSE	248	2	0.235554	IFNG, JAK2
GO_REGULATION_OF_PLASMA_MEMBRANE_ORGANIZATION	72	1	0.235855	IFNG
GO_REGULATION_OF_NEURAL_PRECURSOR_CELL_PROLIFERATION	72	1	0.235855	ASPM
GO_POSITIVE_REGULATION_OF_CELL_DEVELOPMENT	452	3	0.236562	ASPM, IFNG, RFX3
GO_REGULATION_OF_STEROID_METABOLIC_PROCESS	73	1	0.238711	IFNG
GO_POSITIVE_REGULATION_OF_MAPK_CASCADE	455	3	0.239539	CCL4, CCL8, JAK2
GO_FC_GAMMA_RECEPTOR_SIGNALING_PATHWAY	74	1	0.241557	FCGR3A
GO_PYRIMIDINE_CONTAINING_COMPOUND_METABOLIC_PROCESS	74	1	0.241557	AK3
GO_MICROVILLUS	74	1	0.241557	CA9
GO_TRANSCRIPTIONAL_REPRESSOR_COMPLEX	74	1	0.241557	DEPDC1
GO_REGULATION_OF_CALCIUM_MEDIATED_SIGNALING	75	1	0.244392	CCL4
GO_POSITIVE_REGULATION_OF_AUTOPHAGY	75	1	0.244392	IFNG
GO_CILIARY_BASAL_BODY	75	1	0.244392	CENPF
GO_CELLULAR_RESPONSE_TO_DNA_DAMAGE_STIMULUS	678	4	0.244765	CLSPN, GTSE1, NEIL3, PLK1
GO_REGULATION_OF_PROTEIN_SERINE_THREONINE_KINASE_ACTIVITY	461	3	0.245513	CDKN2A, JAK2, PLK1
GO_NEGATIVE_REGULATION_OF_VASCULATURE_DEVELOPMENT	76	1	0.247217	CXCL10
GO_RETROGRADE_VESICLE_MEDIATED_TRANSPORT_GOLGI_TO_ER	76	1	0.247217	KIF2C
GO_NUCLEAR_ENVELOPE_ORGANIZATION	76	1	0.247217	PLK1
GO_CILIARY_PLASM	76	1	0.247217	CENPF
GO_DEFENSE_RESPONSE_TO_OTHER_ORGANISM	463	3	0.24751	CXCL10, IFI44L, IFNG
GO_PROTEIN_MATURATION	257	2	0.247963	CDKN2A, JAK2
GO_ESTABLISHMENT_OF_PROTEIN_LOCALIZATION	1377	7	0.249607	CENPF, GBP5, IFNG, JAK2, PLK1, RANBP6, TOMM5
GO_ANTIGEN_PROCESSING_AND_PRESENTATION_OF_PEPTIDE_OR_POLYSACCHARIDE_ANTIGEN_VIA_MHC_CLASS_II	77	1	0.250031	KIF2C
GO_NEGATIVE_REGULATION_OF_PROTEIN_BINDING	77	1	0.250031	GTSE1
GO_POSITIVE_REGULATION_OF_MYELOID_CELL_DIFFERENTIATION	77	1	0.250031	IFNG
GO_POSITIVE_REGULATION_OF_LYMPHOCYTE_DIFFERENTIATION	77	1	0.250031	IFNG
GO_ANTIGEN_PROCESSING_AND_PRESENTATION_OF_PEPTIDE_ANTIGEN_VIA_MHC_CLASS_II	77	1	0.250031	KIF2C
GO_POSITIVE_REGULATION_OF_KINASE_ACTIVITY	467	3	0.251513	CLSPN, JAK2, TPX2
GO_RUFFLE_MEMBRANE	78	1	0.252835	KANK1
GO_CHAPERONE_BINDING	78	1	0.252835	CDC37L1
GO_MEIOSIS_I	79	1	0.255629	PLK1
GO_NUCLEOSIDE_MONOPHOSPHATE_BIOSYNTHETIC_PROCESS	79	1	0.255629	AK3
GO_NEGATIVE_REGULATION_OF_LEUKOCYTE_DIFFERENTIATION	79	1	0.255629	CDKN2A
GO_STEROID_HORMONE_RECEPTOR_BINDING	79	1	0.255629	KDM4C
GO_MUSCLE_ORGAN_DEVELOPMENT	263	2	0.256252	CENPF, CXCL10
GO_ADULT_LOCOMOTORY_BEHAVIOR	80	1	0.258413	DMRT3
GO_SECRETION_BY_CELL	476	3	0.260555	CCL8, CDC37L1, GBP5
GO_NUCLEOSIDE_DIPHOSPHATE_METABOLIC_PROCESS	81	1	0.261186	AK3
GO_CELLULAR_ALDEHYDE_METABOLIC_PROCESS	81	1	0.261186	GLDC
GO_POSITIVE_REGULATION_OF_LEUKOCYTE_MEDIATED_IMMUNITY	81	1	0.261186	IFNG
GO_BETA_CATENIN_BINDING	81	1	0.261186	KANK1
GO_CELL_SURFACE	700	4	0.262794	CD274, CXCL10, FCGR3A, IFNG
GO_ENZYME_REGULATOR_ACTIVITY	929	5	0.262979	CCL8, CDC20, CDKN2A, CXCL10, DEPDC1
GO_SINGLE_STRANDED_DNA_BINDING	82	1	0.263949	NEIL3
GO_REGULATION_OF_STRIATED_MUSCLE_CELL_DIFFERENTIATION	83	1	0.266702	CXCL10
GO_POSITIVE_REGULATION_OF_EXOCYTOSIS	83	1	0.266702	IFNG
GO_PURINE_NUCLEOSIDE_BIOSYNTHETIC_PROCESS	84	1	0.269445	AK3
GO_CYTOKINESIS	84	1	0.269445	PLK1
GO_PURINE_RIBONUCLEOSIDE_BIOSYNTHETIC_PROCESS	84	1	0.269445	AK3
GO_SECRETORY_GRANULE_LUMEN	84	1	0.269445	CDC37L1
GO_REGULATION_OF_NERVOUS_SYSTEM_DEVELOPMENT	714	4	0.274407	ASPM, CDC20, IFNG, KANK1
GO_DORSAL_VENTRAL_PATTERN_FORMATION	86	1	0.2749	DMRT3
GO_ESTABLISHMENT_OF_CELL_POLARITY	86	1	0.2749	CENPA
GO_PLASMA_MEMBRANE_RAFT	86	1	0.2749	JAK2
GO_REGULATION_OF_EPITHELIAL_CELL_PROLIFERATION	277	2	0.275614	IFNG, NFIB
GO_IMMUNE_RESPONSE_REGULATING_CELL_SURFACE_RECEPTOR_SIGNALING_PATHWAY	277	2	0.275614	FCGR3A, IFNG
GO_NEGATIVE_REGULATION_OF_TRANSCRIPTION_FROM_RNA_POLYMERASE_II_PROMOTER	717	4	0.276908	GLIS3, IFNG, NFIB, PLK1
GO_NEGATIVE_REGULATION_OF_VIRAL_PROCESS	87	1	0.277613	CCL4
GO_OVULATION_CYCLE_PROCESS	87	1	0.277613	CENPI
GO_POSITIVE_REGULATION_OF_PEPTIDYL_SERINE_PHOSPHORYLATION	87	1	0.277613	IFNG
GO_KINASE_INHIBITOR_ACTIVITY	87	1	0.277613	CDKN2A
GO_TRANSCRIPTION_FACTOR_ACTIVITY_RNA_POLYMERASE_II_DISTAL_ENHANCER_SEQUENCE_SPECIFIC_BINDING	87	1	0.277613	RFX3
GO_REGULATION_OF_BODY_FLUID_LEVELS	493	3	0.277755	AK3, APLN, JAK2
GO_REGULATION_OF_CELL_MATRIX_ADHESION	88	1	0.280315	CDKN2A
GO_HEAT_SHOCK_PROTEIN_BINDING	88	1	0.280315	CDC37L1
GO_REGULATION_OF_CELL_DEATH	1430	7	0.280629	CD274, CDKN2A, IDO1, IFNG, JAK2, MELK, PLK1
GO_REGULATION_OF_SYSTEM_PROCESS	496	3	0.280805	APLN, IFNG, JAK2
GO_REGULATION_OF_OXIDOREDUCTASE_ACTIVITY	89	1	0.283008	IFNG
GO_FEEDING_BEHAVIOR	89	1	0.283008	APLN
GO_BEHAVIOR	502	3	0.286913	APLN, DMRT3, IDO1
GO_POSITIVE_REGULATION_OF_BLOOD_CIRCULATION	91	1	0.288364	APLN
GO_RIBONUCLEASE_ACTIVITY	91	1	0.288364	RCL1
GO_OXIDOREDUCTASE_COMPLEX	92	1	0.291027	GLDC
GO_ENZYME_BINDING	1692	8	0.291353	CDC20, CDKN2A, CNTLN, FAM83D, JAK2, KDM4C, PLK1, TPX2
GO_NEGATIVE_REGULATION_OF_CELL_DEVELOPMENT	289	2	0.292201	ASPM, KANK1
GO_SIGNAL_TRANSDUCTION_IN_RESPONSE_TO_DNA_DAMAGE	93	1	0.29368	GTSE1
GO_NEGATIVE_REGULATION_OF_CELL_CYCLE_G1_S_PHASE_TRANSITION	93	1	0.29368	GTSE1
GO_FEMALE_GAMETE_GENERATION	93	1	0.29368	ASPM
GO_PEPTIDYL_LYSINE_MODIFICATION	291	2	0.294963	CDCA8, CDKN2A
GO_CELL_PROJECTION_MEMBRANE	291	2	0.294963	CA9, KANK1
GO_REGULATION_OF_PROTEIN_TARGETING_TO_MITOCHONDRION	94	1	0.296324	CDKN2A
GO_MAINTENANCE_OF_LOCATION_IN_CELL	94	1	0.296324	ASPM
GO_REGULATION_OF_CYTOKINE_BIOSYNTHETIC_PROCESS	94	1	0.296324	IFNG
GO_TRANSCRIPTION_FACTOR_BINDING	513	3	0.298144	CDKN2A, CENPF, PSIP1
GO_GLAND_MORPHOGENESIS	95	1	0.298957	NFIB
GO_MODULATION_OF_SYNAPTIC_TRANSMISSION	295	2	0.300482	CDC20, IFNG
GO_POSITIVE_REGULATION_OF_CELL_SUBSTRATE_ADHESION	96	1	0.301582	JAK2
GO_EXTRINSIC_COMPONENT_OF_CYTOPLASMIC_SIDE_OF_PLASMA_MEMBRANE	96	1	0.301582	JAK2
GO_UNFOLDED_PROTEIN_BINDING	96	1	0.301582	CDC37L1
GO_RIBOSOME_BIOGENESIS	297	2	0.303239	CDKN2A, RCL1
GO_LYMPHOCYTE_ACTIVATION_INVOLVED_IN_IMMUNE_RESPONSE	97	1	0.304196	IFNG
GO_SEQUENCE_SPECIFIC_DNA_BINDING	989	5	0.306655	DMRT3, KIF2C, MYBL2, NFIB, RFX3
GO_POSITIVE_REGULATION_OF_PROTEASOMAL_PROTEIN_CATABOLIC_PROCESS	98	1	0.306801	PLK1
GO_RESPONSE_TO_VITAMIN	98	1	0.306801	CXCL10
GO_REGULATION_OF_PRODUCTION_OF_MOLECULAR_MEDIATOR_OF_IMMUNE_RESPONSE	98	1	0.306801	IFNG
GO_REGULATION_OF_HEMOPOIESIS	300	2	0.307372	CDKN2A, IFNG
GO_CELL_CELL_SIGNALING	754	4	0.308057	CCL4, CCL8, CXCL10, CXCL11
GO_REGULATION_OF_WNT_SIGNALING_PATHWAY	301	2	0.308749	ASPM, KANK1
GO_REGULATION_OF_ANATOMICAL_STRUCTURE_MORPHOGENESIS	992	5	0.308874	CXCL10, DMRT3, IFNG, KANK1, NFIB
GO_MODIFICATION_OF_MORPHOLOGY_OR_PHYSIOLOGY_OF_OTHER_ORGANISM	99	1	0.309396	CCL4
GO_REGULATION_OF_MUSCLE_TISSUE_DEVELOPMENT	99	1	0.309396	CENPF
GO_REGULATION_OF_SMOOTH_MUSCLE_CELL_PROLIFERATION	99	1	0.309396	IFNG
GO_REGULATION_OF_MUSCLE_ORGAN_DEVELOPMENT	99	1	0.309396	CENPF
GO_POSITIVE_REGULATION_OF_TRANSMEMBRANE_RECEPTOR_PROTEIN_SERINE_THREONINE_KINASE_SIGNALING_PATHWAY	99	1	0.309396	TTK
GO_REGULATION_OF_INTERLEUKIN_6_PRODUCTION	100	1	0.311982	IFNG
GO_EXOCYTOSIS	304	2	0.312876	CCL8, CDC37L1
GO_INTRACELLULAR_PROTEIN_TRANSPORT	760	4	0.313151	IFNG, JAK2, RANBP6, TOMM5
GO_HEMOSTASIS	305	2	0.314251	AK3, JAK2
GO_SPINAL_CORD_DEVELOPMENT	101	1	0.314558	DMRT3
GO_CEREBRAL_CORTEX_DEVELOPMENT	101	1	0.314558	ASPM
GO_POSITIVE_REGULATION_OF_EPITHELIAL_CELL_MIGRATION	101	1	0.314558	IFNG
GO_DNA_PACKAGING_COMPLEX	101	1	0.314558	CENPA
GO_HISTONE_DEACETYLASE_BINDING	102	1	0.317125	CDC20
GO_COLUMNAR_CUBOIDAL_EPITHELIAL_CELL_DIFFERENTIATION	103	1	0.319682	RFX3
GO_REGULATION_OF_MYELOID_LEUKOCYTE_DIFFERENTIATION	103	1	0.319682	IFNG
GO_NEGATIVE_REGULATION_OF_PROTEIN_COMPLEX_ASSEMBLY	104	1	0.32223	KANK1
GO_TRANSCRIPTIONAL_ACTIVATOR_ACTIVITY_RNA_POLYMERASE_II_TRANSCRIPTION_REGULATORY_REGION_SEQUENCE_SPECIFIC_BINDING	311	2	0.322488	MYBL2, NFIB
GO_VESICLE_LUMEN	105	1	0.324768	CDC37L1
GO_AMINO_ACID_BINDING	105	1	0.324768	GLDC
GO_REGULATION_OF_SYNAPSE_ORGANIZATION	106	1	0.327297	CDC20
GO_NEURON_MIGRATION	106	1	0.327297	ASPM
GO_PLATELET_DEGRANULATION	106	1	0.327297	CDC37L1
GO_REGULATION_OF_RHO_PROTEIN_SIGNAL_TRANSDUCTION	106	1	0.327297	KANK1
GO_CELLULAR_CATABOLIC_PROCESS	1265	6	0.330339	CDC20, GLDC, GTSE1, IDO1, PLK1, UHRF2
GO_CELL_CYCLE_G1_S_PHASE_TRANSITION	108	1	0.332328	CDKN2A
GO_G1_S_TRANSITION_OF_MITOTIC_CELL_CYCLE	108	1	0.332328	CDKN2A
GO_SMALL_MOLECULE_CATABOLIC_PROCESS	319	2	0.333435	GLDC, IDO1
GO_TRANSCRIPTION_FACTOR_ACTIVITY_RNA_POLYMERASE_II_CORE_PROMOTER_PROXIMAL_REGION_SEQUENCE_SPECIFIC_BINDING	320	2	0.3348	MYBL2, NFIB
GO_RNA_PHOSPHODIESTER_BOND_HYDROLYSIS	109	1	0.334829	RCL1
GO_REGULATION_OF_LYMPHOCYTE_MEDIATED_IMMUNITY	109	1	0.334829	IFNG
GO_POSITIVE_REGULATION_OF_SYNAPTIC_TRANSMISSION	109	1	0.334829	IFNG
GO_METALLOENDOPEPTIDASE_ACTIVITY	109	1	0.334829	ADAMDEC1
GO_POSITIVE_REGULATION_OF_CELL_DIFFERENTIATION	786	4	0.335323	ASPM, IFNG, JAK2, RFX3
GO_REGULATORY_REGION_NUCLEIC_ACID_BINDING	788	4	0.337033	DMRT3, MYBL2, NFIB, RFX3
GO_NEGATIVE_REGULATION_OF_EPITHELIAL_CELL_PROLIFERATION	110	1	0.337321	NFIB
GO_CELLULAR_AMINO_ACID_METABOLIC_PROCESS	322	2	0.337528	GLDC, IDO1
GO_PROTEIN_SECRETION	111	1	0.339804	GBP5
GO_NUCLEOTIDE_EXCISION_REPAIR	111	1	0.339804	NEIL3
GO_COVALENT_CHROMATIN_MODIFICATION	324	2	0.340253	JAK2, KDM4C
GO_OVULATION_CYCLE	112	1	0.342278	CENPI
GO_SPECIFICATION_OF_SYMMETRY	112	1	0.342278	RFX3
GO_DNA_BIOSYNTHETIC_PROCESS	112	1	0.342278	CENPF
GO_VACUOLAR_LUMEN	112	1	0.342278	JAK2
GO_REGULATION_OF_DNA_METABOLIC_PROCESS	326	2	0.342975	CDKN2A, IFNG
GO_NEGATIVE_REGULATION_OF_CELL_MORPHOGENESIS_INVOLVED_IN_DIFFERENTIATION	113	1	0.344742	KANK1
GO_GLYCOSYL_COMPOUND_BIOSYNTHETIC_PROCESS	113	1	0.344742	AK3
GO_HORMONE_ACTIVITY	113	1	0.344742	APLN
GO_FEMALE_SEX_DIFFERENTIATION	114	1	0.347198	CENPI
GO_REGULATION_OF_HYDROLASE_ACTIVITY	1290	6	0.347232	CCL4, CCL8, CDKN2A, DEPDC1, IFNG, JAK2
GO_REGULATION_OF_PEPTIDYL_SERINE_PHOSPHORYLATION	115	1	0.349644	IFNG
GO_MESODERM_DEVELOPMENT	115	1	0.349644	JAK2
GO_REGULATION_OF_DENDRITE_DEVELOPMENT	115	1	0.349644	CDC20
GO_EXTRACELLULAR_SPACE	1295	6	0.350624	APLN, CCL4, CCL8, CXCL10, CXCL11, IFNG
GO_ORGANONITROGEN_COMPOUND_CATABOLIC_PROCESS	332	2	0.351121	GLDC, IDO1
GO_CELLULAR_RESPONSE_TO_TOPOLOGICALLY_INCORRECT_PROTEIN	116	1	0.352082	IFNG
GO_NEGATIVE_REGULATION_OF_PROTEIN_METABOLIC_PROCESS	1050	5	0.352188	CDC20, CDKN2A, CENPF, PLK1, TTK
GO_IMMUNE_SYSTEM_DEVELOPMENT	566	3	0.352506	IFNG, JAK2, MELK
GO_TUMOR_NECROSIS_FACTOR_MEDIATED_SIGNALING_PATHWAY	117	1	0.35451	JAK2
GO_POSITIVE_REGULATION_OF_CANONICAL_WNT_SIGNALING_PATHWAY	117	1	0.35451	ASPM
GO_REGULATION_OF_MEMBRANE_POTENTIAL	335	2	0.355182	CDKN2A, IFNG
GO_DIVALENT_INORGANIC_CATION_HOMEOSTASIS	335	2	0.355182	CCL8, JAK2
GO_ENDOCRINE_SYSTEM_DEVELOPMENT	118	1	0.35693	RFX3
GO_HYDROLASE_ACTIVITY_ACTING_ON_GLYCOSYL_BONDS	118	1	0.35693	NEIL3
GO_REGULATION_OF_ADAPTIVE_IMMUNE_RESPONSE	119	1	0.359341	IFNG
GO_POSITIVE_REGULATION_OF_MITOTIC_CELL_CYCLE	119	1	0.359341	PLK1
GO_MOLECULAR_FUNCTION_REGULATOR	1311	6	0.361502	CCL8, CDC20, CDKN2A, CXCL10, DEPDC1, JAK2
GO_REGULATION_OF_ION_TRANSPORT	577	3	0.363777	CCL4, CXCL10, CXCL11
GO_MULTICELLULAR_ORGANISMAL_SIGNALING	121	1	0.364135	DMRT3
GO_STEROID_HORMONE_MEDIATED_SIGNALING_PATHWAY	121	1	0.364135	JAK2
GO_REGULATION_OF_WOUND_HEALING	122	1	0.366519	KANK1
GO_SIGNAL_TRANSDUCTION_BY_P53_CLASS_MEDIATOR	122	1	0.366519	GTSE1
GO_T_CELL_DIFFERENTIATION	122	1	0.366519	IFNG
GO_REGULATION_OF_LIPID_BIOSYNTHETIC_PROCESS	124	1	0.371261	IFNG
GO_NEGATIVE_REGULATION_OF_HEMOPOIESIS	124	1	0.371261	CDKN2A
GO_REGULATION_OF_ESTABLISHMENT_OF_PROTEIN_LOCALIZATION_TO_MITOCHONDRION	124	1	0.371261	CDKN2A
GO_POSITIVE_REGULATION_OF_LEUKOCYTE_DIFFERENTIATION	125	1	0.373619	IFNG
GO_POSITIVE_REGULATION_OF_CELL_DIVISION	125	1	0.373619	PLK1
GO_REGULATION_OF_SEQUENCE_SPECIFIC_DNA_BINDING_TRANSCRIPTION_FACTOR_ACTIVITY	349	2	0.374017	CDKN2A, JAK2
GO_CELL_MATURATION	126	1	0.375968	RFX3
GO_POSITIVE_REGULATION_OF_LIPID_METABOLIC_PROCESS	126	1	0.375968	IFNG
GO_DEVELOPMENTAL_PROCESS_INVOLVED_IN_REPRODUCTION	589	3	0.376044	ASPM, CENPI, DMRT3
GO_FOREBRAIN_DEVELOPMENT	351	2	0.376691	ASPM, NFIB
GO_POSITIVE_REGULATION_OF_BINDING	127	1	0.378309	JAK2
GO_AMINE_METABOLIC_PROCESS	127	1	0.378309	IDO1
GO_GLIAL_CELL_DIFFERENTIATION	128	1	0.380641	NFIB
GO_MITOCHONDRIAL_PROTEIN_COMPLEX	128	1	0.380641	TOMM5
GO_RESPONSE_TO_OXYGEN_CONTAINING_COMPOUND	1342	6	0.382656	CA9, CXCL10, CXCL11, IDO1, IFNG, JAK2
GO_TUBE_FORMATION	129	1	0.382964	NFIB
GO_PROTEIN_TETRAMERIZATION	129	1	0.382964	GBP5
GO_LEADING_EDGE_MEMBRANE	129	1	0.382964	KANK1
GO_GROWTH_FACTOR_RECEPTOR_BINDING	129	1	0.382964	JAK2
GO_CELL_PART_MORPHOGENESIS	596	3	0.383181	KIF24, NFIB, RFX3
GO_NEGATIVE_REGULATION_OF_PROTEIN_MODIFICATION_PROCESS	597	3	0.3842	CDC20, CDKN2A, PLK1
GO_CIRCULATORY_SYSTEM_PROCESS	357	2	0.384687	APLN, CXCL10
GO_RESPONSE_TO_ALCOHOL	357	2	0.384687	CA9, CXCL10
GO_NEGATIVE_REGULATION_OF_SEQUENCE_SPECIFIC_DNA_BINDING_TRANSCRIPTION_FACTOR_ACTIVITY	130	1	0.385278	CDKN2A
GO_NUCLEUS_ORGANIZATION	130	1	0.385278	PLK1
GO_T_CELL_RECEPTOR_SIGNALING_PATHWAY	131	1	0.387585	IFNG
GO_MAINTENANCE_OF_CELL_NUMBER	132	1	0.389882	ASPM
GO_CENTRAL_NERVOUS_SYSTEM_DEVELOPMENT	851	4	0.391016	ASPM, CENPF, DMRT3, NFIB
GO_CELL_PROJECTION_ORGANIZATION	852	4	0.391872	JAK2, KIF24, NFIB, RFX3
GO_NEGATIVE_REGULATION_OF_NEURON_APOPTOTIC_PROCESS	133	1	0.392171	JAK2
GO_MESENCHYMAL_CELL_DIFFERENTIATION	133	1	0.392171	FAM83D
GO_REGULATION_OF_PHOSPHATIDYLINOSITOL_3_KINASE_SIGNALING	134	1	0.394452	JAK2
GO_ADULT_BEHAVIOR	134	1	0.394452	DMRT3
GO_PURINE_CONTAINING_COMPOUND_BIOSYNTHETIC_PROCESS	134	1	0.394452	AK3
GO_EXTRINSIC_COMPONENT_OF_PLASMA_MEMBRANE	134	1	0.394452	JAK2
GO_NCRNA_PROCESSING	365	2	0.395281	CDKN2A, RCL1
GO_RNA_POLYMERASE_II_TRANSCRIPTION_FACTOR_ACTIVITY_SEQUENCE_SPECIFIC_DNA_BINDING	608	3	0.39538	MYBL2, NFIB, RFX3
GO_ZINC_ION_BINDING	1108	5	0.395918	ADAMDEC1, CA9, KDM4C, NEIL3, UHRF2
GO_MAINTENANCE_OF_LOCATION	135	1	0.396724	ASPM
GO_REGULATION_OF_RESPONSE_TO_DNA_DAMAGE_STIMULUS	135	1	0.396724	CDKN2A
GO_CELLULAR_COMPONENT_MORPHOGENESIS	858	4	0.397003	FAM83D, KIF24, NFIB, RFX3
GO_HINDBRAIN_DEVELOPMENT	136	1	0.398988	NFIB
GO_AUTOPHAGY	369	2	0.400549	CDKN2A, TOMM5
GO_CELL_ACTIVATION_INVOLVED_IN_IMMUNE_RESPONSE	137	1	0.401244	IFNG
GO_REGULATION_OF_SYNAPTIC_PLASTICITY	137	1	0.401244	CDC20
GO_CLUSTER_OF_ACTIN_BASED_CELL_PROJECTIONS	137	1	0.401244	IDO1
GO_RESPONSE_TO_IONIZING_RADIATION	138	1	0.403491	CXCL10
GO_CELLULAR_RESPONSE_TO_OXYGEN_LEVELS	138	1	0.403491	CA9
GO_RAS_PROTEIN_SIGNAL_TRANSDUCTION	139	1	0.40573	CDKN2A
GO_NEGATIVE_REGULATION_OF_CELL_PROJECTION_ORGANIZATION	140	1	0.407961	KANK1
GO_POSITIVE_REGULATION_OF_CHROMOSOME_ORGANIZATION	141	1	0.410183	PLK1
GO_ACTIVATION_OF_IMMUNE_RESPONSE	379	2	0.413627	FCGR3A, IFNG
GO_MACROMOLECULE_CATABOLIC_PROCESS	880	4	0.415765	CDC20, GTSE1, PLK1, UHRF2
GO_REGULATION_OF_PEPTIDASE_ACTIVITY	381	2	0.416227	CDKN2A, JAK2
GO_CULLIN_RING_UBIQUITIN_LIGASE_COMPLEX	144	1	0.416801	CDC20
GO_REGULATION_OF_ORGANELLE_ASSEMBLY	145	1	0.418991	PLK1
GO_CARTILAGE_DEVELOPMENT	146	1	0.421173	NFIB
GO_REGULATION_OF_CELL_PROJECTION_ASSEMBLY	146	1	0.421173	KANK1
GO_REGULATION_OF_MUSCLE_CELL_DIFFERENTIATION	147	1	0.423347	CXCL10
GO_REGULATION_OF_CHROMATIN_ORGANIZATION	147	1	0.423347	UHRF2
GO_INTERSPECIES_INTERACTION_BETWEEN_ORGANISMS	637	3	0.42461	CCL4, CENPA, PSIP1
GO_SYMBIOSIS_ENCOMPASSING_MUTUALISM_THROUGH_PARASITISM	637	3	0.42461	CCL4, CENPA, PSIP1
GO_POSITIVE_REGULATION_OF_MULTI_ORGANISM_PROCESS	148	1	0.425512	IFNG
GO_SENSORY_PERCEPTION_OF_MECHANICAL_STIMULUS	149	1	0.42767	IFNG
GO_HUMORAL_IMMUNE_RESPONSE	149	1	0.42767	IFNG
GO_PALLIUM_DEVELOPMENT	149	1	0.42767	ASPM
GO_POSITIVE_REGULATION_OF_IMMUNE_EFFECTOR_PROCESS	149	1	0.42767	IFNG
GO_LIGASE_ACTIVITY	391	2	0.429141	RCL1, UHRF2
GO_REGULATION_OF_LEUKOCYTE_MEDIATED_IMMUNITY	150	1	0.42982	IFNG
GO_NUCLEAR_ENVELOPE	392	2	0.430424	CENPF, RANBP6
GO_MITOCHONDRIAL_MATRIX	392	2	0.430424	AK3, GLDC
GO_REGULATION_OF_ACTIN_FILAMENT_LENGTH	152	1	0.434095	KANK1
GO_REGULATION_OF_NEURON_PROJECTION_DEVELOPMENT	395	2	0.434266	CDC20, KANK1
GO_ANTIGEN_PROCESSING_AND_PRESENTATION_OF_PEPTIDE_ANTIGEN	153	1	0.436221	KIF2C
GO_RUFFLE	153	1	0.436221	KANK1
GO_HORMONE_MEDIATED_SIGNALING_PATHWAY	154	1	0.438339	JAK2
GO_CELL_PROJECTION_PART	907	4	0.438639	CA9, CENPF, KANK1, TPX2
GO_REPRODUCTIVE_SYSTEM_DEVELOPMENT	400	2	0.440639	ASPM, CENPI
GO_POSITIVE_REGULATION_OF_HEMOPOIESIS	156	1	0.442552	IFNG
GO_REGENERATION	156	1	0.442552	JAK2
GO_RESPONSE_TO_TOPOLOGICALLY_INCORRECT_PROTEIN	156	1	0.442552	IFNG
GO_AXON	404	2	0.445711	NFIB, TPX2
GO_PATTERN_SPECIFICATION_PROCESS	405	2	0.446975	DMRT3, RFX3
GO_CATABOLIC_PROCESS	1698	7	0.447463	CDC20, CDKN2A, GLDC, GTSE1, IDO1, PLK1, UHRF2
GO_EPITHELIUM_DEVELOPMENT	919	4	0.448736	CA9, JAK2, NFIB, RFX3
GO_MITOCHONDRIAL_MEMBRANE_PART	159	1	0.448813	TOMM5
GO_PHAGOCYTOSIS	160	1	0.450885	FCGR3A
GO_VASCULAR_PROCESS_IN_CIRCULATORY_SYSTEM	160	1	0.450885	APLN
GO_NEGATIVE_REGULATION_OF_PHOSPHORYLATION	409	2	0.452015	CDKN2A, PLK1
GO_MONOCARBOXYLIC_ACID_BIOSYNTHETIC_PROCESS	161	1	0.452949	IDO1
GO_INTRACELLULAR_RECEPTOR_SIGNALING_PATHWAY	161	1	0.452949	JAK2
GO_UBIQUITIN_LIKE_PROTEIN_TRANSFERASE_ACTIVITY	410	2	0.453272	CDKN2A, UHRF2
GO_ANTIGEN_RECEPTOR_MEDIATED_SIGNALING_PATHWAY	162	1	0.455005	IFNG
GO_REGULATION_OF_EPITHELIAL_CELL_MIGRATION	162	1	0.455005	IFNG
GO_MITOCHONDRIAL_TRANSPORT	162	1	0.455005	TOMM5
GO_REGULATION_OF_TRANSMEMBRANE_TRANSPORT	414	2	0.458281	CXCL10, CXCL11
GO_REGULATION_OF_BLOOD_PRESSURE	164	1	0.459095	APLN
GO_GLIOGENESIS	164	1	0.459095	NFIB
GO_MUSCLE_STRUCTURE_DEVELOPMENT	416	2	0.460776	CENPF, CXCL10
GO_CYTOPLASMIC_SIDE_OF_MEMBRANE	165	1	0.461129	JAK2
GO_NEGATIVE_REGULATION_OF_CELL_GROWTH	166	1	0.463155	CDKN2A
GO_NEGATIVE_REGULATION_OF_NEURON_DEATH	167	1	0.465173	JAK2
GO_POSITIVE_REGULATION_OF_APOPTOTIC_SIGNALING_PATHWAY	167	1	0.465173	JAK2
GO_PROTEIN_DNA_COMPLEX	168	1	0.467184	CENPA
GO_REGULATION_OF_PROTEIN_POLYMERIZATION	169	1	0.469188	KANK1
GO_ACTIN_FILAMENT_ORGANIZATION	169	1	0.469188	JAK2
GO_OXIDOREDUCTASE_ACTIVITY	687	3	0.473876	GLDC, IDO1, KDM4C
GO_BINDING_BRIDGING	173	1	0.477129	CNTLN
GO_HEAD_DEVELOPMENT	694	3	0.480633	ASPM, CENPF, NFIB
GO_ACTIN_BASED_CELL_PROJECTION	175	1	0.481056	CA9
GO_REGULATION_OF_MYELOID_CELL_DIFFERENTIATION	176	1	0.483008	IFNG
GO_NUCLEOSIDE_PHOSPHATE_BIOSYNTHETIC_PROCESS	177	1	0.484953	AK3
GO_TRANSCRIPTION_FROM_RNA_POLYMERASE_II_PROMOTER	700	3	0.486395	GLIS3, MYBL2, NFIB
GO_POSITIVE_REGULATION_OF_DNA_METABOLIC_PROCESS	178	1	0.486891	IFNG
GO_RESPONSE_TO_KETONE	178	1	0.486891	CA9
GO_REGULATION_OF_RAS_PROTEIN_SIGNAL_TRANSDUCTION	178	1	0.486891	KANK1
GO_CALMODULIN_BINDING	178	1	0.486891	ASPM
GO_ORGANELLE_DISASSEMBLY	179	1	0.488822	CDKN2A
GO_OUTER_MEMBRANE	179	1	0.488822	TOMM5
GO_EPITHELIAL_CELL_DEVELOPMENT	180	1	0.490746	RFX3
GO_REPRODUCTION	1236	5	0.491291	ASPM, CENPI, DMRT3, IDO1, PLK1
GO_REGULATION_OF_EXOCYTOSIS	182	1	0.494572	IFNG
GO_MYELOID_CELL_DIFFERENTIATION	182	1	0.494572	JAK2
GO_CELLULAR_RESPONSE_TO_ORGANIC_SUBSTANCE	1776	7	0.496198	CCL4, CCL8, CXCL10, CXCL11, GBP5, IFNG, JAK2
GO_FC_RECEPTOR_SIGNALING_PATHWAY	184	1	0.49837	FCGR3A
GO_REGULATION_OF_MULTI_ORGANISM_PROCESS	447	2	0.498601	CCL4, IFNG
GO_POSITIVE_REGULATION_OF_PROTEIN_COMPLEX_ASSEMBLY	185	1	0.500258	GBP5
GO_DNA_REPAIR	449	2	0.500984	CLSPN, NEIL3
GO_RIBONUCLEOPROTEIN_COMPLEX_SUBUNIT_ORGANIZATION	186	1	0.502139	PSIP1
GO_MESENCHYME_DEVELOPMENT	186	1	0.502139	FAM83D
GO_DEVELOPMENTAL_MATURATION	186	1	0.502139	RFX3
GO_PROTEIN_HETERODIMERIZATION_ACTIVITY	451	2	0.503361	CENPA, DMRT3
GO_STEM_CELL_DIFFERENTIATION	188	1	0.505881	FAM83D
GO_REGULATION_OF_NEURON_APOPTOTIC_PROCESS	189	1	0.507742	JAK2
GO_WOUND_HEALING	456	2	0.509272	AK3, JAK2
GO_RESPONSE_TO_NUTRIENT	190	1	0.509595	CXCL10
GO_ENZYME_ACTIVATOR_ACTIVITY	457	2	0.510449	CCL8, DEPDC1
GO_CONNECTIVE_TISSUE_DEVELOPMENT	192	1	0.513282	NFIB
GO_REGULATION_OF_ANATOMICAL_STRUCTURE_SIZE	460	2	0.513969	APLN, KANK1
GO_RESPIRATORY_SYSTEM_DEVELOPMENT	194	1	0.516942	NFIB
GO_REGULATION_OF_CELLULAR_COMPONENT_BIOGENESIS	733	3	0.517548	GBP5, KANK1, PLK1
GO_UBIQUITIN_LIKE_PROTEIN_LIGASE_ACTIVITY	195	1	0.518761	UHRF2
GO_REGULATION_OF_CYTOSOLIC_CALCIUM_ION_CONCENTRATION	199	1	0.525973	JAK2
GO_NEURON_PROJECTION_GUIDANCE	199	1	0.525973	NFIB
GO_ORGANIC_ACID_BINDING	201	1	0.529538	GLDC
GO_REGULATION_OF_MITOCHONDRION_ORGANIZATION	203	1	0.533078	CDKN2A
GO_REGULATION_OF_TRANSMEMBRANE_RECEPTOR_PROTEIN_SERINE_THREONINE_KINASE_SIGNALING_PATHWAY	203	1	0.533078	TTK
GO_GERM_CELL_DEVELOPMENT	203	1	0.533078	ASPM
GO_EPITHELIAL_CELL_DIFFERENTIATION	478	2	0.534747	NFIB, RFX3
GO_RESPONSE_TO_MECHANICAL_STIMULUS	207	1	0.540078	CXCL10
GO_LYMPHOCYTE_DIFFERENTIATION	207	1	0.540078	IFNG
GO_DEFENSE_RESPONSE_TO_BACTERIUM	207	1	0.540078	IFNG
GO_CONTRACTILE_FIBER	207	1	0.540078	IDO1
GO_MONOCARBOXYLIC_ACID_METABOLIC_PROCESS	484	2	0.541542	GLDC, IDO1
GO_RESPONSE_TO_STEROID_HORMONE	485	2	0.542667	CA9, JAK2
GO_BASOLATERAL_PLASMA_MEMBRANE	209	1	0.543539	CA9
GO_MULTI_MULTICELLULAR_ORGANISM_PROCESS	210	1	0.54526	IDO1
GO_CELLULAR_RESPONSE_TO_STEROID_HORMONE_STIMULUS	210	1	0.54526	JAK2
GO_CELLULAR_MODIFIED_AMINO_ACID_METABOLIC_PROCESS	212	1	0.548683	IDO1
GO_AXON_PART	212	1	0.548683	TPX2
GO_CALCIUM_ION_TRANSPORT	213	1	0.550385	CCL8
GO_PROTEIN_FOLDING	214	1	0.552081	CDC37L1
GO_CELLULAR_RESPONSE_TO_OXYGEN_CONTAINING_COMPOUND	773	3	0.553975	CXCL10, IFNG, JAK2
GO_TRANSCRIPTION_COREPRESSOR_ACTIVITY	216	1	0.555454	NFIB
GO_NUCLEOSIDE_TRIPHOSPHATE_METABOLIC_PROCESS	218	1	0.558801	AK3
GO_CELL_FATE_COMMITMENT	218	1	0.558801	DMRT3
GO_REGULATED_EXOCYTOSIS	218	1	0.558801	CDC37L1
GO_CELL_MORPHOGENESIS_INVOLVED_IN_DIFFERENTIATION	502	2	0.561522	FAM83D, NFIB
GO_NCRNA_METABOLIC_PROCESS	503	2	0.562614	CDKN2A, RCL1
GO_POSITIVE_REGULATION_OF_SEQUENCE_SPECIFIC_DNA_BINDING_TRANSCRIPTION_FACTOR_ACTIVITY	221	1	0.563776	JAK2
GO_TRANSITION_METAL_ION_BINDING	1339	5	0.564329	ADAMDEC1, CA9, KDM4C, NEIL3, UHRF2
GO_REGULATION_OF_SYNAPSE_STRUCTURE_OR_ACTIVITY	223	1	0.567062	CDC20
GO_RAS_GUANYL_NUCLEOTIDE_EXCHANGE_FACTOR_ACTIVITY	223	1	0.567062	JAK2
GO_RESPONSE_TO_ENDOPLASMIC_RETICULUM_STRESS	225	1	0.570324	IFNG
GO_REGULATION_OF_VASCULATURE_DEVELOPMENT	225	1	0.570324	CXCL10
GO_RNA_PROCESSING	793	3	0.571595	CDKN2A, PSIP1, RCL1
GO_REGULATION_OF_CANONICAL_WNT_SIGNALING_PATHWAY	230	1	0.578372	ASPM
GO_NUCLEOSIDE_MONOPHOSPHATE_METABOLIC_PROCESS	231	1	0.579964	AK3
GO_PHOSPHATE_CONTAINING_COMPOUND_METABOLIC_PROCESS	1917	7	0.580915	AK3, CCL8, CLSPN, JAK2, MELK, PLK1, TTK
GO_CELL_CORTEX	232	1	0.58155	MELK
GO_NEGATIVE_REGULATION_OF_CATALYTIC_ACTIVITY	807	3	0.583681	CDC20, CDKN2A, PLK1
GO_NEGATIVE_REGULATION_OF_PHOSPHORUS_METABOLIC_PROCESS	524	2	0.585112	CDKN2A, PLK1
GO_NEGATIVE_REGULATION_OF_PHOSPHATE_METABOLIC_PROCESS	524	2	0.585112	CDKN2A, PLK1
GO_NUCLEIC_ACID_PHOSPHODIESTER_BOND_HYDROLYSIS	235	1	0.586273	RCL1
GO_NEURON_PROJECTION_DEVELOPMENT	527	2	0.588257	JAK2, NFIB
GO_POSITIVE_REGULATION_OF_CELLULAR_COMPONENT_ORGANIZATION	1097	4	0.590135	CDC20, GBP5, IFNG, PLK1
GO_CELL_DEVELOPMENT	1379	5	0.591344	ASPM, FAM83D, JAK2, NFIB, RFX3
GO_PROTEIN_POLYUBIQUITINATION	241	1	0.595561	CDKN2A
GO_AMIDE_BINDING	241	1	0.595561	RANBP6
GO_POSITIVE_REGULATION_OF_INNATE_IMMUNE_RESPONSE	242	1	0.597089	GBP5
GO_REGULATION_OF_CELL_PROJECTION_ORGANIZATION	537	2	0.598618	CDC20, KANK1
GO_REGULATION_OF_AUTOPHAGY	244	1	0.600128	IFNG
GO_PROTEIN_HOMOOLIGOMERIZATION	245	1	0.60164	GBP5
GO_EXTRINSIC_COMPONENT_OF_MEMBRANE	245	1	0.60164	JAK2
GO_REGULATION_OF_NEURON_DEATH	246	1	0.603145	JAK2
GO_RESPONSE_TO_WOUNDING	547	2	0.608788	AK3, JAK2
GO_NEGATIVE_REGULATION_OF_LOCOMOTION	250	1	0.609111	KANK1
GO_LEUKOCYTE_CELL_CELL_ADHESION	250	1	0.609111	IFNG
GO_MITOCHONDRION_ORGANIZATION	551	2	0.612802	CDKN2A, TOMM5
GO_NEGATIVE_REGULATION_OF_CELL_DEATH	842	3	0.612973	IDO1, JAK2, PLK1
GO_CELL_ACTIVATION	553	2	0.614798	CXCL10, IFNG
GO_UBIQUITIN_LIGASE_COMPLEX	255	1	0.616445	CDC20
GO_AGING	256	1	0.617895	CDKN2A
GO_CELLULAR_CHEMICAL_HOMEOSTASIS	557	2	0.618766	CCL8, JAK2
GO_RNA_SPLICING_VIA_TRANSESTERIFICATION_REACTIONS	257	1	0.61934	PSIP1
GO_NEURON_DIFFERENTIATION	850	3	0.61948	DMRT3, JAK2, NFIB
GO_CARBOXYLIC_ACID_BIOSYNTHETIC_PROCESS	258	1	0.62078	IDO1
GO_ORGANIC_ACID_BIOSYNTHETIC_PROCESS	258	1	0.62078	IDO1
GO_DIVALENT_INORGANIC_CATION_TRANSPORT	258	1	0.62078	CCL8
GO_NUCLEIC_ACID_BINDING_TRANSCRIPTION_FACTOR_ACTIVITY	1146	4	0.625395	DMRT3, MYBL2, NFIB, RFX3
GO_ION_HOMEOSTASIS	564	2	0.625637	CCL8, JAK2
GO_OXIDATION_REDUCTION_PROCESS	858	3	0.625914	GLDC, IDO1, KDM4C
GO_NUCLEAR_MEMBRANE	262	1	0.626485	RANBP6
GO_MACROAUTOPHAGY	263	1	0.627899	TOMM5
GO_CELLULAR_RESPONSE_TO_PEPTIDE	267	1	0.633499	JAK2
GO_TRANSCRIPTION_FACTOR_ACTIVITY_PROTEIN_BINDING	573	2	0.634333	NFIB, PSIP1
GO_REGULATION_OF_SMALL_GTPASE_MEDIATED_SIGNAL_TRANSDUCTION	272	1	0.640382	KANK1
GO_IDENTICAL_PROTEIN_BINDING	1168	4	0.640618	CCL4, CENPF, DMRT3, GBP5
GO_VESICLE_MEDIATED_TRANSPORT	1169	4	0.641301	CCL8, CDC37L1, FCGR3A, KIF2C
GO_REGULATION_OF_LIPID_METABOLIC_PROCESS	274	1	0.6431	IFNG
GO_CYTOPLASMIC_REGION	277	1	0.647139	MELK
GO_MITOCHONDRIAL_PART	888	3	0.649399	AK3, GLDC, TOMM5
GO_TISSUE_DEVELOPMENT	1472	5	0.650632	CA9, FAM83D, JAK2, NFIB, RFX3
GO_PEPTIDASE_ACTIVITY	592	2	0.652186	ADAMDEC1, ERMP1
GO_RESPONSE_TO_ORGANIC_CYCLIC_COMPOUND	892	3	0.652453	CA9, CXCL10, JAK2
GO_MEMBRANE_MICRODOMAIN	286	1	0.658987	JAK2
GO_CILIARY_PART	287	1	0.66028	CENPF
GO_LEUKOCYTE_DIFFERENTIATION	288	1	0.661567	IFNG
GO_PLASMA_MEMBRANE_REGION	907	3	0.663742	CA9, JAK2, KANK1
GO_RHYTHMIC_PROCESS	290	1	0.664127	CENPI
GO_TRANSCRIPTION_COACTIVATOR_ACTIVITY	290	1	0.664127	PSIP1
GO_TRANSCRIPTION_FACTOR_COMPLEX	291	1	0.6654	RFX3
GO_POSITIVE_REGULATION_OF_NEURON_DIFFERENTIATION	293	1	0.667932	IFNG
GO_GUANYL_NUCLEOTIDE_EXCHANGE_FACTOR_ACTIVITY	294	1	0.669191	JAK2
GO_UROGENITAL_SYSTEM_DEVELOPMENT	295	1	0.670445	CENPF
GO_ANATOMICAL_STRUCTURE_FORMATION_INVOLVED_IN_MORPHOGENESIS	918	3	0.671856	KIF24, NFIB, RFX3
GO_REGULATION_OF_GROWTH	616	2	0.673764	CDKN2A, IFNG
GO_PROTEIN_DOMAIN_SPECIFIC_BINDING	617	2	0.674639	CNTLN, JAK2
GO_MITOCHONDRION	1517	5	0.677392	AK3, CDKN2A, FAM72A, GLDC, TOMM5
GO_REGIONALIZATION	302	1	0.679094	DMRT3
GO_SINGLE_ORGANISM_CATABOLIC_PROCESS	929	3	0.679831	CDKN2A, GLDC, IDO1
GO_INTRACELLULAR_SIGNAL_TRANSDUCTION	1523	5	0.68086	CDKN2A, DEPDC1, GTSE1, JAK2, MELK
GO_RESPONSE_TO_OXYGEN_LEVELS	304	1	0.681524	CA9
GO_REGULATION_OF_ACTIN_FILAMENT_BASED_PROCESS	305	1	0.682732	KANK1
GO_GOLGI_VESICLE_TRANSPORT	310	1	0.688705	KIF2C
GO_REGULATION_OF_MAP_KINASE_ACTIVITY	315	1	0.694568	JAK2
GO_TUBE_MORPHOGENESIS	319	1	0.69918	NFIB
GO_DEVELOPMENTAL_GROWTH	321	1	0.70146	ASPM
GO_NUCLEOSIDE_TRIPHOSPHATASE_REGULATOR_ACTIVITY	321	1	0.70146	DEPDC1
GO_REGULATION_OF_CELL_MORPHOGENESIS_INVOLVED_IN_DIFFERENTIATION	327	1	0.708199	KANK1
GO_REGULATION_OF_CELLULAR_COMPONENT_SIZE	328	1	0.709308	KANK1
GO_CELLULAR_HOMEOSTASIS	659	2	0.709759	CCL8, JAK2
GO_GOLGI_MEMBRANE	659	2	0.709759	GBP4, GBP5
GO_LYMPHOCYTE_ACTIVATION	334	1	0.715873	IFNG
GO_NEURON_DEVELOPMENT	667	2	0.716087	JAK2, NFIB
GO_NUCLEAR_BODY	335	1	0.716953	CDKN2A
GO_SMALL_GTPASE_MEDIATED_SIGNAL_TRANSDUCTION	339	1	0.721232	CDKN2A
GO_CELL_LEADING_EDGE	340	1	0.722292	KANK1
GO_RESPONSE_TO_ABIOTIC_STIMULUS	992	3	0.722825	CA9, CXCL10, PSIP1
GO_SECRETORY_GRANULE	345	1	0.727533	CDC37L1
GO_RNA_SPLICING	349	1	0.731655	PSIP1
GO_BIOLOGICAL_ADHESION	1006	3	0.731764	CCL4, IFNG, TROAP
GO_REGULATION_OF_APOPTOTIC_SIGNALING_PATHWAY	352	1	0.734706	JAK2
GO_PROTEIN_HOMODIMERIZATION_ACTIVITY	693	2	0.735875	CENPF, DMRT3
GO_HYDROLASE_ACTIVITY_ACTING_ON_ESTER_BONDS	695	2	0.737349	NEIL3, RCL1
GO_GLYCOSYL_COMPOUND_METABOLIC_PROCESS	355	1	0.737723	AK3
GO_ENVELOPE	1019	3	0.739867	CENPF, RANBP6, TOMM5
GO_CELL_MORPHOGENESIS_INVOLVED_IN_NEURON_DIFFERENTIATION	358	1	0.740707	NFIB
GO_ENZYME_INHIBITOR_ACTIVITY	364	1	0.746574	CDKN2A
GO_ORGANIC_ANION_TRANSPORT	373	1	0.755131	CA9
GO_MULTICELLULAR_ORGANISM_REPRODUCTION	722	2	0.756581	ASPM, CENPI
GO_SINGLE_ORGANISM_BEHAVIOR	377	1	0.758842	DMRT3
GO_REGULATION_OF_CELL_GROWTH	380	1	0.761589	CDKN2A
GO_POSITIVE_REGULATION_OF_CELLULAR_COMPONENT_BIOGENESIS	382	1	0.763403	GBP5
GO_PURINE_CONTAINING_COMPOUND_METABOLIC_PROCESS	383	1	0.764305	AK3
GO_NEURON_PROJECTION_MORPHOGENESIS	390	1	0.770526	NFIB
GO_MORPHOGENESIS_OF_AN_EPITHELIUM	391	1	0.771401	CA9
GO_ENDOSOMAL_PART	392	1	0.772273	JAK2
GO_RESPONSE_TO_PEPTIDE	395	1	0.77487	JAK2
GO_CELL_PROJECTION	1708	5	0.775936	CA9, CENPF, KANK1, NFIB, TPX2
GO_RESPONSE_TO_RADIATION	398	1	0.777437	CXCL10
GO_GROWTH	398	1	0.777437	ASPM
GO_SIGNAL_TRANSDUCTION_BY_PROTEIN_PHOSPHORYLATION	400	1	0.779133	JAK2
GO_LEUKOCYTE_ACTIVATION	403	1	0.781653	IFNG
GO_ENDOPEPTIDASE_ACTIVITY	404	1	0.782486	ADAMDEC1
GO_REGULATION_OF_IMMUNE_EFFECTOR_PROCESS	407	1	0.784968	IFNG
GO_PROTEIN_DIMERIZATION_ACTIVITY	1104	3	0.788265	CENPA, CENPF, DMRT3
GO_MRNA_PROCESSING	412	1	0.789043	PSIP1
GO_MEMBRANE_REGION	1107	3	0.789832	CA9, JAK2, KANK1
GO_ORGANIC_CYCLIC_COMPOUND_CATABOLIC_PROCESS	414	1	0.790652	IDO1
GO_NEGATIVE_REGULATION_OF_INTRACELLULAR_SIGNAL_TRANSDUCTION	423	1	0.797743	KANK1
GO_PROTEIN_OLIGOMERIZATION	423	1	0.797743	GBP5
GO_SMALL_MOLECULE_BIOSYNTHETIC_PROCESS	428	1	0.80158	IDO1
GO_RESPONSE_TO_EXTRACELLULAR_STIMULUS	432	1	0.804598	CXCL10
GO_CILIUM	433	1	0.805345	CENPF
GO_ORGANOPHOSPHATE_BIOSYNTHETIC_PROCESS	434	1	0.80609	AK3
GO_ACTIN_FILAMENT_BASED_PROCESS	439	1	0.809771	JAK2
GO_CELLULAR_RESPONSE_TO_ORGANIC_CYCLIC_COMPOUND	448	1	0.816225	JAK2
GO_MALE_GAMETE_GENERATION	448	1	0.816225	ASPM
GO_SINGLE_ORGANISM_CELL_ADHESION	449	1	0.816929	IFNG
GO_SKELETAL_SYSTEM_DEVELOPMENT	449	1	0.816929	NFIB
GO_SECRETORY_VESICLE	454	1	0.820407	CDC37L1
GO_REGULATION_OF_VESICLE_MEDIATED_TRANSPORT	455	1	0.821095	IFNG
GO_ENDOMEMBRANE_SYSTEM_ORGANIZATION	455	1	0.821095	PLK1
GO_GOLGI_APPARATUS_PART	842	2	0.828232	GBP4, GBP5
GO_MULTI_ORGANISM_REPRODUCTIVE_PROCESS	843	2	0.828742	ASPM, IDO1
GO_ENDOCYTOSIS	468	1	0.829806	FCGR3A
GO_CHEMICAL_HOMEOSTASIS	853	2	0.833768	CCL8, JAK2
GO_CELL_BODY	486	1	0.841182	TPX2
GO_CELLULAR_RESPONSE_TO_NITROGEN_COMPOUND	487	1	0.841792	JAK2
GO_RESPONSE_TO_HORMONE	871	2	0.842489	CA9, JAK2
GO_TRANSMEMBRANE_RECEPTOR_PROTEIN_TYROSINE_KINASE_SIGNALING_PATHWAY	492	1	0.844805	JAK2
GO_ANION_TRANSPORT	493	1	0.845401	CA9
GO_NEURON_PART	1233	3	0.84759	IDO1, NFIB, TPX2
GO_NUCLEOBASE_CONTAINING_SMALL_MOLECULE_METABOLIC_PROCESS	510	1	0.855195	AK3
GO_TISSUE_MORPHOGENESIS	522	1	0.861738	CA9
GO_NEURON_PROJECTION	915	2	0.86212	NFIB, TPX2
GO_ORGANIC_ACID_METABOLIC_PROCESS	921	2	0.86462	GLDC, IDO1
GO_REGULATION_OF_CELL_MORPHOGENESIS	534	1	0.86799	KANK1
GO_CELLULAR_RESPONSE_TO_HORMONE_STIMULUS	536	1	0.869005	JAK2
GO_TUBE_DEVELOPMENT	539	1	0.870512	NFIB
GO_HOMEOSTATIC_PROCESS	1297	3	0.871393	CCL8, IFNG, JAK2
GO_POSITIVE_REGULATION_OF_ORGANELLE_ORGANIZATION	547	1	0.87445	PLK1
GO_GAMETE_GENERATION	553	1	0.877325	ASPM
GO_METAL_ION_TRANSPORT	563	1	0.881975	CCL8
GO_CYTOPLASMIC_VESICLE_PART	567	1	0.883786	CDC37L1
GO_CARBOHYDRATE_DERIVATIVE_BIOSYNTHETIC_PROCESS	574	1	0.886889	AK3
GO_ORGANONITROGEN_COMPOUND_BIOSYNTHETIC_PROCESS	984	2	0.888514	AK3, IDO1
GO_SYSTEM_PROCESS	1701	4	0.890088	APLN, CXCL10, DMRT3, IFNG
GO_MRNA_METABOLIC_PROCESS	583	1	0.89076	PSIP1
GO_SMALL_MOLECULE_METABOLIC_PROCESS	1708	4	0.892003	AK3, CA9, GLDC, IDO1
GO_CATALYTIC_COMPLEX	997	2	0.892941	CDC20, GLDC
GO_GOLGI_APPARATUS	1366	3	0.893404	GBP4, GBP5, GLIS3
GO_CELL_CELL_ADHESION	593	1	0.894909	IFNG
GO_SOMATODENDRITIC_COMPARTMENT	635	1	0.910704	TPX2
GO_LIPID_BINDING	638	1	0.911739	MELK
GO_MITOCHONDRIAL_ENVELOPE	643	1	0.913436	TOMM5
GO_VACUOLAR_PART	644	1	0.913772	JAK2
GO_NUCLEOPLASM_PART	664	1	0.920223	CDKN2A
GO_REGULATION_OF_CELLULAR_RESPONSE_TO_STRESS	667	1	0.921149	CDKN2A
GO_TRANSFERASE_COMPLEX	672	1	0.922669	CDC20
GO_CALCIUM_ION_BINDING	673	1	0.92297	MELK
GO_ENZYME_LINKED_RECEPTOR_PROTEIN_SIGNALING_PATHWAY	680	1	0.925041	JAK2
GO_POLY_A_RNA_BINDING	1113	2	0.9259	CDKN2A, PSIP1
GO_SEXUAL_REPRODUCTION	684	1	0.9262	ASPM
GO_RNA_BINDING	1517	3	0.930408	CDKN2A, PSIP1, RCL1
GO_NEUROLOGICAL_SYSTEM_PROCESS	1170	2	0.938402	DMRT3, IFNG
GO_ENDOSOME	738	1	0.940224	JAK2
GO_INTRACELLULAR_VESICLE	1199	2	0.943982	CDC37L1, GBP5
GO_CATION_TRANSPORT	771	1	0.947467	CCL8
GO_ION_TRANSPORT	1222	2	0.948068	CA9, CCL8
GO_TRANSPORTER_ACTIVITY	1239	2	0.950908	RANBP6, TOMM5
GO_SINGLE_ORGANISM_BIOSYNTHETIC_PROCESS	1284	2	0.957739	AK3, IDO1
GO_ORGAN_MORPHOGENESIS	830	1	0.958329	NFIB
GO_RESPONSE_TO_NITROGEN_COMPOUND	835	1	0.959141	JAK2
GO_ORGANOPHOSPHATE_METABOLIC_PROCESS	845	1	0.960718	AK3
GO_MEMBRANE_ORGANIZATION	853	1	0.961937	PLK1
GO_ORGANONITROGEN_COMPOUND_METABOLIC_PROCESS	1727	3	0.96276	AK3, GLDC, IDO1
GO_SENSORY_PERCEPTION	874	1	0.964961	IFNG
GO_NUCLEAR_OUTER_MEMBRANE_ENDOPLASMIC_RETICULUM_MEMBRANE_NETWORK	930	1	0.971919	ERMP1
GO_RESPONSE_TO_ENDOGENOUS_STIMULUS	1413	2	0.972703	CA9, JAK2
GO_MEMBRANE_PROTEIN_COMPLEX	961	1	0.975166	TOMM5
GO_CELLULAR_RESPONSE_TO_ENDOGENOUS_STIMULUS	979	1	0.97688	JAK2
GO_CARBOHYDRATE_DERIVATIVE_METABOLIC_PROCESS	1013	1	0.979804	AK3
GO_ENDOPLASMIC_RETICULUM_PART	1085	1	0.984849	ERMP1
GO_VACUOLE	1107	1	0.986127	JAK2
GO_NEGATIVE_REGULATION_OF_CELL_COMMUNICATION	1149	1	0.988279	KANK1
GO_SIGNALING_RECEPTOR_ACTIVITY	1280	1	0.993094	KIR2DL4
GO_NEGATIVE_REGULATION_OF_RESPONSE_TO_STIMULUS	1306	1	0.993785	KANK1
GO_ENDOPLASMIC_RETICULUM	1512	1	0.997325	ERMP1
GO_RECEPTOR_ACTIVITY	1523	1	0.997444	KIR2DL4
GO_INTRINSIC_COMPONENT_OF_PLASMA_MEMBRANE	1585	1	0.998021	KIR2DL4
GO_SIGNAL_TRANSDUCER_ACTIVITY	1612	1	0.998231	KIR2DL4
GO_REGULATION_OF_DOPAMINE_METABOLIC_PROCESS	17	0	1
GO_LACTATE_TRANSPORT	12	0	1
GO_POSITIVE_REGULATION_OF_VIRAL_TRANSCRIPTION	35	0	1
GO_DETECTION_OF_LIGHT_STIMULUS_INVOLVED_IN_VISUAL_PERCEPTION	18	0	1
GO_CARDIAC_CHAMBER_DEVELOPMENT	140	0	1
GO_CALCIUM_ION_TRANSMEMBRANE_IMPORT_INTO_CYTOSOL	41	0	1
GO_DNA_DEPENDENT_DNA_REPLICATION_MAINTENANCE_OF_FIDELITY	21	0	1
GO_TRNA_AMINOACYLATION	51	0	1
GO_CIRCADIAN_RHYTHM	134	0	1
GO_PHOSPHATIDYLSERINE_ACYL_CHAIN_REMODELING	16	0	1
GO_REGULATION_OF_GENE_SILENCING_BY_RNA	20	0	1
GO_GLUCURONATE_METABOLIC_PROCESS	27	0	1
GO_CELLULAR_RESPONSE_TO_LIPOPROTEIN_PARTICLE_STIMULUS	13	0	1
GO_CEREBRAL_CORTEX_RADIAL_GLIA_GUIDED_MIGRATION	17	0	1
GO_NEGATIVE_REGULATION_OF_TRANSCRIPTION_FACTOR_IMPORT_INTO_NUCLEUS	39	0	1
GO_POTASSIUM_ION_TRANSPORT	152	0	1
GO_L_PHENYLALANINE_METABOLIC_PROCESS	11	0	1
GO_REGULATION_OF_T_CELL_RECEPTOR_SIGNALING_PATHWAY	27	0	1
GO_CARDIAC_MUSCLE_ADAPTATION	11	0	1
GO_MOVEMENT_IN_ENVIRONMENT_OF_OTHER_ORGANISM_INVOLVED_IN_SYMBIOTIC_INTERACTION	84	0	1
GO_APICAL_PROTEIN_LOCALIZATION	12	0	1
GO_REGULATION_OF_ESTABLISHMENT_OF_PLANAR_POLARITY	110	0	1
GO_FOREBRAIN_NEURON_DEVELOPMENT	34	0	1
GO_POSITIVE_REGULATION_OF_PROTEIN_MATURATION	17	0	1
GO_NEUROMUSCULAR_JUNCTION_DEVELOPMENT	35	0	1
GO_NEGATIVE_REGULATION_OF_RESPONSE_TO_ENDOPLASMIC_RETICULUM_STRESS	37	0	1
GO_SMAD_PROTEIN_SIGNAL_TRANSDUCTION	56	0	1
GO_CYTOPLASMIC_TRANSLATION	40	0	1
GO_REGULATION_OF_DOUBLE_STRAND_BREAK_REPAIR	34	0	1
GO_RNA_DEPENDENT_DNA_BIOSYNTHETIC_PROCESS	21	0	1
GO_REGULATION_OF_B_CELL_RECEPTOR_SIGNALING_PATHWAY	13	0	1
GO_REGULATION_OF_G_PROTEIN_COUPLED_RECEPTOR_PROTEIN_SIGNALING_PATHWAY	123	0	1
GO_DENDRITE_DEVELOPMENT	79	0	1
GO_REGULATION_OF_RESPIRATORY_BURST	11	0	1
GO_G_PROTEIN_COUPLED_RECEPTOR_INTERNALIZATION	13	0	1
GO_MEMORY	96	0	1
GO_REGULATION_OF_GOLGI_ORGANIZATION	11	0	1
GO_ENDOTHELIAL_CELL_DEVELOPMENT	45	0	1
GO_POSITIVE_REGULATION_OF_MYOTUBE_DIFFERENTIATION	29	0	1
GO_MULTICELLULAR_ORGANISM_AGING	30	0	1
GO_LIPID_MODIFICATION	200	0	1
GO_NEGATIVE_REGULATION_OF_KIDNEY_DEVELOPMENT	17	0	1
GO_ACYLGLYCEROL_HOMEOSTASIS	29	0	1
GO_NEGATIVE_REGULATION_OF_PHOSPHOPROTEIN_PHOSPHATASE_ACTIVITY	15	0	1
GO_HEMOGLOBIN_METABOLIC_PROCESS	11	0	1
GO_SINGLE_FERTILIZATION	109	0	1
GO_REGULATION_OF_MITOCHONDRIAL_DEPOLARIZATION	18	0	1
GO_NEGATIVE_REGULATION_OF_MAP_KINASE_ACTIVITY	73	0	1
GO_SYNAPTIC_VESICLE_LOCALIZATION	101	0	1
GO_PHENOL_CONTAINING_COMPOUND_METABOLIC_PROCESS	79	0	1
GO_REGULATION_OF_ANTIGEN_RECEPTOR_MEDIATED_SIGNALING_PATHWAY	38	0	1
GO_METANEPHRIC_NEPHRON_MORPHOGENESIS	21	0	1
GO_GLYCERALDEHYDE_3_PHOSPHATE_METABOLIC_PROCESS	16	0	1
GO_RESPONSE_TO_UV_C	11	0	1
GO_CARBOHYDRATE_CATABOLIC_PROCESS	109	0	1
GO_DENTATE_GYRUS_DEVELOPMENT	15	0	1
GO_ESTABLISHMENT_OR_MAINTENANCE_OF_TRANSMEMBRANE_ELECTROCHEMICAL_GRADIENT	13	0	1
GO_STRESS_FIBER_ASSEMBLY	14	0	1
GO_LABYRINTHINE_LAYER_DEVELOPMENT	44	0	1
GO_N_TERMINAL_PROTEIN_AMINO_ACID_ACETYLATION	14	0	1
GO_CERAMIDE_CATABOLIC_PROCESS	12	0	1
GO_EXCRETION	44	0	1
GO_DIGESTION	130	0	1
GO_POSITIVE_REGULATION_OF_SYNAPTIC_TRANSMISSION_GLUTAMATERGIC	18	0	1
GO_OLIGOSACCHARIDE_METABOLIC_PROCESS	63	0	1
GO_NEGATIVE_REGULATION_OF_DENDRITIC_SPINE_DEVELOPMENT	11	0	1
GO_ETHER_METABOLIC_PROCESS	12	0	1
GO_HEMATOPOIETIC_PROGENITOR_CELL_DIFFERENTIATION	94	0	1
GO_CYTOKINE_METABOLIC_PROCESS	17	0	1
GO_ANTEROGRADE_AXONAL_TRANSPORT	22	0	1
GO_NEGATIVE_REGULATION_OF_ERK1_AND_ERK2_CASCADE	50	0	1
GO_STEROID_BIOSYNTHETIC_PROCESS	110	0	1
GO_ALDITOL_PHOSPHATE_METABOLIC_PROCESS	34	0	1
GO_SODIUM_INDEPENDENT_ORGANIC_ANION_TRANSPORT	23	0	1
GO_REGULATION_OF_PROTEIN_TYROSINE_KINASE_ACTIVITY	60	0	1
GO_REGULATION_OF_INTERFERON_BETA_PRODUCTION	43	0	1
GO_NUCLEOSOME_DISASSEMBLY	17	0	1
GO_DNA_TEMPLATED_TRANSCRIPTION_ELONGATION	91	0	1
GO_N_GLYCAN_PROCESSING	19	0	1
GO_INORGANIC_ION_IMPORT_INTO_CELL	15	0	1
GO_ENDOPLASMIC_RETICULUM_TO_CYTOSOL_TRANSPORT	22	0	1
GO_NEGATIVE_REGULATION_OF_REPRODUCTIVE_PROCESS	52	0	1
GO_G_PROTEIN_COUPLED_PURINERGIC_RECEPTOR_SIGNALING_PATHWAY	20	0	1
GO_OLFACTORY_BULB_INTERNEURON_DIFFERENTIATION	15	0	1
GO_POSITIVE_REGULATION_OF_G_PROTEIN_COUPLED_RECEPTOR_PROTEIN_SIGNALING_PATHWAY	23	0	1
GO_ATTACHMENT_OF_SPINDLE_MICROTUBULES_TO_KINETOCHORE	14	0	1
GO_VIRAL_BUDDING	23	0	1
GO_REGULATION_OF_LYASE_ACTIVITY	84	0	1
GO_NEGATIVE_REGULATION_OF_TRANSMEMBRANE_TRANSPORT	82	0	1
GO_RESPONSE_TO_ETHANOL	135	0	1
GO_SULFUR_COMPOUND_METABOLIC_PROCESS	350	0	1
GO_REGULATION_OF_CELL_CYCLE_CHECKPOINT	27	0	1
GO_NEGATIVE_REGULATION_OF_TRANSCRIPTION_REGULATORY_REGION_DNA_BINDING	17	0	1
GO_POSITIVE_REGULATION_OF_DNA_REPLICATION	86	0	1
GO_MYELINATION_IN_PERIPHERAL_NERVOUS_SYSTEM	21	0	1
GO_POSITIVE_REGULATION_OF_REPRODUCTIVE_PROCESS	52	0	1
GO_POSITIVE_REGULATION_OF_METANEPHROS_DEVELOPMENT	14	0	1
GO_NUCLEOTIDE_PHOSPHORYLATION	58	0	1
GO_POSITIVE_REGULATION_OF_GENE_EXPRESSION_EPIGENETIC	75	0	1
GO_GLUTAMATE_SECRETION	28	0	1
GO_REGULATION_OF_MRNA_METABOLIC_PROCESS	115	0	1
GO_POSITIVE_REGULATION_OF_PROTEIN_BINDING	73	0	1
GO_REGULATION_OF_NFAT_PROTEIN_IMPORT_INTO_NUCLEUS	17	0	1
GO_REGULATION_OF_VASCULOGENESIS	13	0	1
GO_LENS_FIBER_CELL_DIFFERENTIATION	25	0	1
GO_HEPATICOBILIARY_SYSTEM_DEVELOPMENT	126	0	1
GO_FATTY_ACID_CATABOLIC_PROCESS	73	0	1
GO_REGULATION_OF_VESICLE_FUSION	61	0	1
GO_MITOCHONDRIAL_RESPIRATORY_CHAIN_COMPLEX_I_BIOGENESIS	51	0	1
GO_NEGATIVE_REGULATION_OF_CELLULAR_RESPONSE_TO_TRANSFORMING_GROWTH_FACTOR_BETA_STIMULUS	64	0	1
GO_REGULATION_OF_LIPID_STORAGE	40	0	1
GO_CARBOHYDRATE_TRANSPORT	95	0	1
GO_REGULATION_OF_CELLULAR_RESPONSE_TO_GROWTH_FACTOR_STIMULUS	224	0	1
GO_EMBRYONIC_HEMOPOIESIS	19	0	1
GO_EMBRYO_DEVELOPMENT_ENDING_IN_BIRTH_OR_EGG_HATCHING	541	0	1
GO_PROTEIN_EXPORT_FROM_NUCLEUS	29	0	1
GO_POSITIVE_REGULATION_OF_SEQUESTERING_OF_CALCIUM_ION	16	0	1
GO_SECONDARY_METABOLITE_BIOSYNTHETIC_PROCESS	20	0	1
GO_CELL_MIGRATION_INVOLVED_IN_HEART_DEVELOPMENT	14	0	1
GO_NUCLEAR_ENVELOPE_REASSEMBLY	17	0	1
GO_INTRINSIC_APOPTOTIC_SIGNALING_PATHWAY_IN_RESPONSE_TO_DNA_DAMAGE_BY_P53_CLASS_MEDIATOR	29	0	1
GO_PHOSPHOLIPID_METABOLIC_PROCESS	348	0	1
GO_AMMONIUM_ION_METABOLIC_PROCESS	166	0	1
GO_REGULATION_OF_INTERLEUKIN_4_PRODUCTION	26	0	1
GO_NCRNA_CATABOLIC_PROCESS	22	0	1
GO_REGULATION_OF_FAT_CELL_DIFFERENTIATION	101	0	1
GO_GLUTAMINE_FAMILY_AMINO_ACID_BIOSYNTHETIC_PROCESS	20	0	1
GO_REGULATION_OF_PROTEIN_ACTIVATION_CASCADE	34	0	1
GO_REGULATION_OF_TELOMERASE_RNA_LOCALIZATION_TO_CAJAL_BODY	15	0	1
GO_REGULATION_OF_RNA_STABILITY	136	0	1
GO_BUNDLE_OF_HIS_CELL_TO_PURKINJE_MYOCYTE_COMMUNICATION	11	0	1
GO_REGULATION_OF_CELL_MATURATION	18	0	1
GO_MAMMARY_GLAND_MORPHOGENESIS	40	0	1
GO_URETER_DEVELOPMENT	11	0	1
GO_NEGATIVE_REGULATION_OF_PROTEIN_PROCESSING	35	0	1
GO_BODY_MORPHOGENESIS	43	0	1
GO_SOMATIC_STEM_CELL_POPULATION_MAINTENANCE	66	0	1
GO_CYTOPLASMIC_MICROTUBULE_ORGANIZATION	39	0	1
GO_PROTEIN_ACTIVATION_CASCADE	71	0	1
GO_POSITIVE_REGULATION_OF_PHOSPHOLIPASE_ACTIVITY	53	0	1
GO_NEGATIVE_REGULATION_OF_PEPTIDYL_TYROSINE_PHOSPHORYLATION	38	0	1
GO_REGULATION_OF_COLLATERAL_SPROUTING	18	0	1
GO_ESTABLISHMENT_OR_MAINTENANCE_OF_MONOPOLAR_CELL_POLARITY	15	0	1
GO_NEURON_RECOGNITION	33	0	1
GO_RESPONSE_TO_AMMONIUM_ION	50	0	1
GO_REGULATION_OF_INTERLEUKIN_5_PRODUCTION	18	0	1
GO_REGULATION_OF_GLUCOSE_IMPORT	58	0	1
GO_PINOCYTOSIS	13	0	1
GO_REGULATION_OF_EPITHELIAL_CELL_APOPTOTIC_PROCESS	57	0	1
GO_PHOSPHATIDYLETHANOLAMINE_METABOLIC_PROCESS	17	0	1
GO_PHOSPHATIDYLCHOLINE_METABOLIC_PROCESS	62	0	1
GO_METENCEPHALON_DEVELOPMENT	99	0	1
GO_G_PROTEIN_COUPLED_PURINERGIC_NUCLEOTIDE_RECEPTOR_SIGNALING_PATHWAY	14	0	1
GO_ACTIN_FILAMENT_BUNDLE_ORGANIZATION	46	0	1
GO_CELLULAR_RESPONSE_TO_VIRUS	22	0	1
GO_CYTOPLASMIC_MRNA_PROCESSING_BODY_ASSEMBLY	12	0	1
GO_RESPIRATORY_GASEOUS_EXCHANGE	48	0	1
GO_AMINO_ACID_ACTIVATION	51	0	1
GO_DENDRITIC_CELL_DIFFERENTIATION	32	0	1
GO_NATURAL_KILLER_CELL_DIFFERENTIATION	12	0	1
GO_BONE_TRABECULA_MORPHOGENESIS	11	0	1
GO_REGULATION_OF_INFLAMMATORY_RESPONSE_TO_ANTIGENIC_STIMULUS	17	0	1
GO_REGULATION_OF_SKELETAL_MUSCLE_TISSUE_DEVELOPMENT	47	0	1
GO_MUSCLE_TISSUE_DEVELOPMENT	261	0	1
GO_NEGATIVE_REGULATION_OF_PROTEIN_AUTOPHOSPHORYLATION	10	0	1
GO_ACID_SECRETION	66	0	1
GO_CARDIAC_SEPTUM_DEVELOPMENT	82	0	1
GO_REGULATION_OF_ICOSANOID_SECRETION	20	0	1
GO_L_ALPHA_AMINO_ACID_TRANSMEMBRANE_TRANSPORT	31	0	1
GO_REGULATION_OF_HISTONE_METHYLATION	52	0	1
GO_POSITIVE_REGULATION_OF_MITOCHONDRIAL_FISSION	12	0	1
GO_POSITIVE_REGULATION_OF_NUCLEAR_TRANSCRIBED_MRNA_CATABOLIC_PROCESS_DEADENYLATION_DEPENDENT_DECAY	14	0	1
GO_ANTIMICROBIAL_HUMORAL_RESPONSE	43	0	1
GO_EPIDERMIS_MORPHOGENESIS	28	0	1
GO_INTERMEDIATE_FILAMENT_BASED_PROCESS	43	0	1
GO_COGNITION	245	0	1
GO_RESPONSE_TO_ZINC_ION	55	0	1
GO_PURINE_DEOXYRIBONUCLEOTIDE_METABOLIC_PROCESS	14	0	1
GO_DISRUPTION_OF_CELLS_OF_OTHER_ORGANISM	25	0	1
GO_AXIS_SPECIFICATION	90	0	1
GO_PHOSPHATIDYLINOSITOL_METABOLIC_PROCESS	193	0	1
GO_PIGMENT_GRANULE_LOCALIZATION	23	0	1
GO_PROSTAGLANDIN_BIOSYNTHETIC_PROCESS	18	0	1
GO_VASCULAR_ENDOTHELIAL_GROWTH_FACTOR_SIGNALING_PATHWAY	14	0	1
GO_RESPONSE_TO_ORGANOPHOSPHORUS	138	0	1
GO_AXO_DENDRITIC_TRANSPORT	33	0	1
GO_SINGLE_ORGANISM_MEMBRANE_FUSION	120	0	1
GO_SUBSTRATE_INDEPENDENT_TELENCEPHALIC_TANGENTIAL_INTERNEURON_MIGRATION	13	0	1
GO_SKELETAL_MUSCLE_TISSUE_REGENERATION	26	0	1
GO_POLYSACCHARIDE_BIOSYNTHETIC_PROCESS	41	0	1
GO_ORGAN_REGENERATION	82	0	1
GO_NEGATIVE_REGULATION_OF_ADAPTIVE_IMMUNE_RESPONSE	36	0	1
GO_REGULATION_OF_SYSTEMIC_ARTERIAL_BLOOD_PRESSURE_BY_CIRCULATORY_RENIN_ANGIOTENSIN	14	0	1
GO_B_CELL_HOMEOSTASIS	21	0	1
GO_IRE1_MEDIATED_UNFOLDED_PROTEIN_RESPONSE	53	0	1
GO_POSITIVE_REGULATION_OF_CALCIUM_ION_DEPENDENT_EXOCYTOSIS	26	0	1
GO_POSITIVE_REGULATION_OF_ENDOCYTOSIS	114	0	1
GO_REGULATION_OF_TRANSLATION_IN_RESPONSE_TO_STRESS	19	0	1
GO_MULTI_ORGANISM_TRANSPORT	65	0	1
GO_PHENOL_CONTAINING_COMPOUND_BIOSYNTHETIC_PROCESS	33	0	1
GO_POSITIVE_REGULATION_OF_ERYTHROCYTE_DIFFERENTIATION	23	0	1
GO_DENDRITIC_CELL_MIGRATION	21	0	1
GO_SENSORY_PERCEPTION_OF_TEMPERATURE_STIMULUS	20	0	1
GO_LYSOSOMAL_TRANSPORT	66	0	1
GO_POSITIVE_REGULATION_OF_DNA_BIOSYNTHETIC_PROCESS	58	0	1
GO_POSITIVE_REGULATION_OF_MACROPHAGE_ACTIVATION	12	0	1
GO_EXTRACELLULAR_NEGATIVE_REGULATION_OF_SIGNAL_TRANSDUCTION	14	0	1
GO_OUTFLOW_TRACT_SEPTUM_MORPHOGENESIS	13	0	1
GO_REGULATION_OF_MAMMARY_GLAND_EPITHELIAL_CELL_PROLIFERATION	16	0	1
GO_REGULATION_OF_PHOSPHATIDYLINOSITOL_3_KINASE_ACTIVITY	39	0	1
GO_CELLULAR_RESPONSE_TO_EPIDERMAL_GROWTH_FACTOR_STIMULUS	23	0	1
GO_LEUKOCYTE_DEGRANULATION	30	0	1
GO_CELLULAR_GLUCAN_METABOLIC_PROCESS	57	0	1
GO_REGULATION_OF_MORPHOGENESIS_OF_A_BRANCHING_STRUCTURE	53	0	1
GO_RESPONSE_TO_ELECTRICAL_STIMULUS	42	0	1
GO_NEGATIVE_REGULATION_OF_TELOMERE_MAINTENANCE_VIA_TELOMERASE	12	0	1
GO_REGULATION_OF_ESTABLISHMENT_OF_PLANAR_POLARITY_INVOLVED_IN_NEURAL_TUBE_CLOSURE	14	0	1
GO_REGULATION_OF_ERBB_SIGNALING_PATHWAY	79	0	1
GO_REGULATION_OF_CHOLESTEROL_HOMEOSTASIS	11	0	1
GO_VENTRICULAR_SEPTUM_MORPHOGENESIS	27	0	1
GO_POSITIVE_REGULATION_OF_ENDOTHELIAL_CELL_CHEMOTAXIS	11	0	1
GO_POSITIVE_REGULATION_OF_ENDOTHELIAL_CELL_DIFFERENTIATION	15	0	1
GO_TOLERANCE_INDUCTION	11	0	1
GO_SYNAPSE_ORGANIZATION	143	0	1
GO_METANEPHROS_DEVELOPMENT	80	0	1
GO_NEGATIVE_REGULATION_OF_TRANSPORTER_ACTIVITY	62	0	1
GO_ENDOSOME_ORGANIZATION	61	0	1
GO_DEVELOPMENTAL_PROGRAMMED_CELL_DEATH	25	0	1
GO_POSITIVE_REGULATION_OF_SKELETAL_MUSCLE_TISSUE_DEVELOPMENT	26	0	1
GO_FOCAL_ADHESION_ASSEMBLY	23	0	1
GO_COLLAGEN_FIBRIL_ORGANIZATION	36	0	1
GO_ICOSANOID_BIOSYNTHETIC_PROCESS	43	0	1
GO_POSITIVE_REGULATION_OF_NEURON_DEATH	67	0	1
GO_RESPONSE_TO_ESTRADIOL	145	0	1
GO_CORONARY_VASCULATURE_DEVELOPMENT	35	0	1
GO_NEURON_PROJECTION_EXTENSION	52	0	1
GO_REGULATION_OF_CARDIAC_MUSCLE_TISSUE_DEVELOPMENT	47	0	1
GO_NEGATIVE_REGULATION_OF_CYCLIC_NUCLEOTIDE_METABOLIC_PROCESS	42	0	1
GO_PYRIMIDINE_NUCLEOTIDE_BIOSYNTHETIC_PROCESS	29	0	1
GO_RESPONSE_TO_MUSCLE_STRETCH	19	0	1
GO_NEGATIVE_REGULATION_OF_OLIGODENDROCYTE_DIFFERENTIATION	13	0	1
GO_ENTRY_INTO_CELL_OF_OTHER_ORGANISM_INVOLVED_IN_SYMBIOTIC_INTERACTION	84	0	1
GO_NEGATIVE_REGULATION_OF_SODIUM_ION_TRANSPORT	11	0	1
GO_REGULATION_OF_TRIGLYCERIDE_METABOLIC_PROCESS	33	0	1
GO_NEGATIVE_REGULATION_OF_GLYCOPROTEIN_BIOSYNTHETIC_PROCESS	12	0	1
GO_RESPONSE_TO_COCAINE	45	0	1
GO_NEGATIVE_REGULATION_OF_INTRINSIC_APOPTOTIC_SIGNALING_PATHWAY_BY_P53_CLASS_MEDIATOR	18	0	1
GO_PROTEIN_DNA_COMPLEX_DISASSEMBLY	17	0	1
GO_RIBONUCLEOTIDE_CATABOLIC_PROCESS	28	0	1
GO_DNA_TEMPLATED_TRANSCRIPTION_TERMINATION	98	0	1
GO_NEGATIVE_REGULATION_OF_INTERLEUKIN_1_PRODUCTION	18	0	1
GO_POSITIVE_REGULATION_OF_CATION_CHANNEL_ACTIVITY	36	0	1
GO_REGULATION_OF_PROSTAGLANDIN_SECRETION	13	0	1
GO_REGULATION_OF_PODOSOME_ASSEMBLY	14	0	1
GO_PURINE_RIBONUCLEOSIDE_CATABOLIC_PROCESS	14	0	1
GO_CARDIAC_LEFT_VENTRICLE_MORPHOGENESIS	12	0	1
GO_RESPONSE_TO_AMINE	48	0	1
GO_REGULATION_OF_ORGANIC_ACID_TRANSPORT	50	0	1
GO_REGULATION_OF_DNA_DEPENDENT_DNA_REPLICATION	40	0	1
GO_NEGATIVE_REGULATION_OF_POTASSIUM_ION_TRANSMEMBRANE_TRANSPORTER_ACTIVITY	16	0	1
GO_HEART_TRABECULA_MORPHOGENESIS	24	0	1
GO_RESPIRATORY_CHAIN_COMPLEX_IV_ASSEMBLY	10	0	1
GO_VESICLE_LOCALIZATION	217	0	1
GO_NITRIC_OXIDE_METABOLIC_PROCESS	15	0	1
GO_POSITIVE_REGULATION_OF_CELL_FATE_COMMITMENT	10	0	1
GO_FOREBRAIN_MORPHOGENESIS	14	0	1
GO_TELOMERE_CAPPING	28	0	1
GO_PROSTATE_GLAND_MORPHOGENESIS	22	0	1
GO_NEGATIVE_REGULATION_OF_AXON_EXTENSION	37	0	1
GO_POSITIVE_REGULATION_OF_TYPE_I_INTERFERON_PRODUCTION	70	0	1
GO_REGULATION_OF_STRESS_ACTIVATED_PROTEIN_KINASE_SIGNALING_CASCADE	196	0	1
GO_MYELOID_CELL_DEVELOPMENT	41	0	1
GO_REGULATION_OF_MITOCHONDRIAL_MEMBRANE_PERMEABILITY_INVOLVED_IN_APOPTOTIC_PROCESS	21	0	1
GO_REGULATION_OF_HISTONE_DEACETYLATION	23	0	1
GO_NEUROTRANSMITTER_UPTAKE	15	0	1
GO_MICROTUBULE_ANCHORING	17	0	1
GO_REGULATION_OF_MRNA_CATABOLIC_PROCESS	25	0	1
GO_INTERMEDIATE_FILAMENT_ORGANIZATION	20	0	1
GO_SODIUM_ION_EXPORT	12	0	1
GO_CELLULAR_RESPONSE_TO_UV	65	0	1
GO_RESPONSE_TO_ACID_CHEMICAL	310	0	1
GO_RESPONSE_TO_PROSTAGLANDIN_E	25	0	1
GO_NEGATIVE_REGULATION_OF_RESPONSE_TO_REACTIVE_OXYGEN_SPECIES	18	0	1
GO_POSITIVE_REGULATION_OF_EPITHELIAL_TO_MESENCHYMAL_TRANSITION	33	0	1
GO_POSITIVE_REGULATION_OF_RNA_SPLICING	22	0	1
GO_RESPONSE_TO_IMMOBILIZATION_STRESS	22	0	1
GO_RESPONSE_TO_INTERLEUKIN_4	30	0	1
GO_POSITIVE_REGULATION_OF_KERATINOCYTE_DIFFERENTIATION	13	0	1
GO_CARDIAC_CHAMBER_MORPHOGENESIS	102	0	1
GO_REGULATION_OF_CARTILAGE_DEVELOPMENT	60	0	1
GO_POSITIVE_REGULATION_OF_INTERLEUKIN_8_PRODUCTION	45	0	1
GO_SEROTONIN_METABOLIC_PROCESS	12	0	1
GO_REGULATION_OF_DEFENSE_RESPONSE_TO_VIRUS	182	0	1
GO_REGULATION_OF_ENDOTHELIAL_CELL_APOPTOTIC_PROCESS	40	0	1
GO_DNA_DEPENDENT_DNA_REPLICATION	92	0	1
GO_REGULATION_OF_SKELETAL_MUSCLE_CELL_DIFFERENTIATION	15	0	1
GO_STEROL_HOMEOSTASIS	58	0	1
GO_EMBRYONIC_AXIS_SPECIFICATION	33	0	1
GO_LIPOPROTEIN_METABOLIC_PROCESS	123	0	1
GO_DISRUPTION_OF_CELLS_OF_OTHER_ORGANISM_INVOLVED_IN_SYMBIOTIC_INTERACTION	12	0	1
GO_IRON_COORDINATION_ENTITY_TRANSPORT	11	0	1
GO_PHOSPHATIDYLCHOLINE_BIOSYNTHETIC_PROCESS	26	0	1
GO_KERATAN_SULFATE_METABOLIC_PROCESS	32	0	1
GO_REGULATION_OF_COAGULATION	85	0	1
GO_MEMBRANE_BIOGENESIS	30	0	1
GO_REGULATION_OF_EPIDERMIS_DEVELOPMENT	61	0	1
GO_FORMATION_OF_PRIMARY_GERM_LAYER	109	0	1
GO_ENERGY_RESERVE_METABOLIC_PROCESS	70	0	1
GO_GLYCOLIPID_BIOSYNTHETIC_PROCESS	61	0	1
GO_REGULATION_OF_ACTIN_NUCLEATION	26	0	1
GO_REGULATION_OF_DENDRITIC_CELL_DIFFERENTIATION	10	0	1
GO_HAIR_CYCLE	78	0	1
GO_AMIDE_TRANSPORT	96	0	1
GO_NEGATIVE_REGULATION_OF_LIPID_METABOLIC_PROCESS	77	0	1
GO_PROTEIN_LOCALIZATION_TO_KINETOCHORE	10	0	1
GO_NEGATIVE_REGULATION_OF_FAT_CELL_DIFFERENTIATION	40	0	1
GO_PHOTOPERIODISM	24	0	1
GO_ALPHA_AMINO_ACID_BIOSYNTHETIC_PROCESS	76	0	1
GO_MESENCHYMAL_TO_EPITHELIAL_TRANSITION	15	0	1
GO_ESTABLISHMENT_OF_ENDOTHELIAL_INTESTINAL_BARRIER	11	0	1
GO_CELL_CYCLE_DNA_REPLICATION	11	0	1
GO_NEGATIVE_REGULATION_OF_TRANSCRIPTION_ELONGATION_FROM_RNA_POLYMERASE_II_PROMOTER	8	0	1
GO_CHROMOSOME_CONDENSATION	30	0	1
GO_ESTABLISHMENT_OF_EPITHELIAL_CELL_POLARITY	22	0	1
GO_TOLL_LIKE_RECEPTOR_9_SIGNALING_PATHWAY	14	0	1
GO_EMBRYONIC_DIGIT_MORPHOGENESIS	59	0	1
GO_NITROGEN_CYCLE_METABOLIC_PROCESS	15	0	1
GO_DETECTION_OF_TEMPERATURE_STIMULUS_INVOLVED_IN_SENSORY_PERCEPTION_OF_PAIN	12	0	1
GO_NECROPTOTIC_PROCESS	21	0	1
GO_NEGATIVE_REGULATION_OF_GLIOGENESIS	34	0	1
GO_DENDRITIC_CELL_CHEMOTAXIS	16	0	1
GO_REGULATION_OF_ANTIGEN_PROCESSING_AND_PRESENTATION_OF_PEPTIDE_ANTIGEN	11	0	1
GO_REGULATION_OF_NEURONAL_SYNAPTIC_PLASTICITY	46	0	1
GO_REGULATION_OF_PHOSPHOLIPASE_C_ACTIVITY	39	0	1
GO_REGULATION_OF_DEVELOPMENTAL_GROWTH	282	0	1
GO_REGULATION_OF_SYNAPTIC_TRANSMISSION_GLUTAMATERGIC	50	0	1
GO_ACTIVATION_OF_PHOSPHOLIPASE_C_ACTIVITY	27	0	1
GO_NEGATIVE_REGULATION_OF_BIOMINERAL_TISSUE_DEVELOPMENT	19	0	1
GO_NEGATIVE_REGULATION_OF_BONE_RESORPTION	11	0	1
GO_CELLULAR_RESPONSE_TO_EXTERNAL_STIMULUS	258	0	1
GO_NADP_METABOLIC_PROCESS	27	0	1
GO_POSITIVE_REGULATION_OF_MRNA_PROCESSING	30	0	1
GO_EPITHELIAL_TUBE_BRANCHING_INVOLVED_IN_LUNG_MORPHOGENESIS	24	0	1
GO_DETECTION_OF_MECHANICAL_STIMULUS_INVOLVED_IN_SENSORY_PERCEPTION	23	0	1
GO_REGULATION_OF_CELL_CELL_ADHESION_MEDIATED_BY_CADHERIN	9	0	1
GO_METANEPHRIC_EPITHELIUM_DEVELOPMENT	20	0	1
GO_REGULATION_OF_SMOOTH_MUSCLE_CELL_DIFFERENTIATION	19	0	1
GO_FATTY_ACID_BETA_OXIDATION	51	0	1
GO_RESPONSE_TO_FLUID_SHEAR_STRESS	34	0	1
GO_NEGATIVE_REGULATION_OF_MUSCLE_CONTRACTION	22	0	1
GO_TRANSITION_METAL_ION_TRANSPORT	107	0	1
GO_POSITIVE_REGULATION_OF_MUSCLE_CELL_DIFFERENTIATION	83	0	1
GO_PHOSPHATIDYLINOSITOL_BIOSYNTHETIC_PROCESS	120	0	1
GO_POSITIVE_REGULATION_OF_LIPID_KINASE_ACTIVITY	32	0	1
GO_RESPONSE_TO_CORTICOSTEROID	174	0	1
GO_POSITIVE_REGULATION_OF_LEUKOCYTE_DEGRANULATION	18	0	1
GO_SODIUM_ION_TRANSMEMBRANE_TRANSPORT	84	0	1
GO_NEGATIVE_REGULATION_OF_BLOOD_VESSEL_ENDOTHELIAL_CELL_MIGRATION	23	0	1
GO_GLUCOCORTICOID_METABOLIC_PROCESS	16	0	1
GO_SKELETAL_MUSCLE_ADAPTATION	11	0	1
GO_PROTEIN_N_LINKED_GLYCOSYLATION	73	0	1
GO_HINDLIMB_MORPHOGENESIS	37	0	1
GO_ESTABLISHMENT_OR_MAINTENANCE_OF_EPITHELIAL_CELL_APICAL_BASAL_POLARITY	28	0	1
GO_LOOP_OF_HENLE_DEVELOPMENT	11	0	1
GO_VESICLE_ORGANIZATION	269	0	1
GO_KERATINOCYTE_PROLIFERATION	12	0	1
GO_MACROPHAGE_ACTIVATION_INVOLVED_IN_IMMUNE_RESPONSE	11	0	1
GO_SMOOTH_MUSCLE_CELL_DIFFERENTIATION	30	0	1
GO_MALE_GENITALIA_DEVELOPMENT	21	0	1
GO_ENDOCARDIAL_CUSHION_DEVELOPMENT	32	0	1
GO_NEGATIVE_REGULATION_OF_ERBB_SIGNALING_PATHWAY	44	0	1
GO_RESPONSE_TO_DIETARY_EXCESS	21	0	1
GO_BRANCH_ELONGATION_OF_AN_EPITHELIUM	17	0	1
GO_POSITIVE_REGULATION_OF_CELLULAR_AMIDE_METABOLIC_PROCESS	105	0	1
GO_POSITIVE_REGULATION_OF_VACUOLE_ORGANIZATION	12	0	1
GO_NEGATIVE_REGULATION_OF_PLATELET_ACTIVATION	17	0	1
GO_GLUTAMINE_FAMILY_AMINO_ACID_CATABOLIC_PROCESS	24	0	1
GO_EMBRYONIC_SKELETAL_SYSTEM_DEVELOPMENT	120	0	1
GO_NEURON_MATURATION	30	0	1
GO_THYMIC_T_CELL_SELECTION	19	0	1
GO_COENZYME_A_METABOLIC_PROCESS	17	0	1
GO_PROTEIN_LOCALIZATION_TO_CILIUM	24	0	1
GO_RNA_STABILIZATION	29	0	1
GO_ACTIN_MYOSIN_FILAMENT_SLIDING	38	0	1
GO_REGULATION_OF_PROTEIN_HOMODIMERIZATION_ACTIVITY	22	0	1
GO_REGULATION_OF_HETEROTYPIC_CELL_CELL_ADHESION	18	0	1
GO_MITOCHONDRIAL_DNA_METABOLIC_PROCESS	10	0	1
GO_CGMP_METABOLIC_PROCESS	23	0	1
GO_RETINAL_GANGLION_CELL_AXON_GUIDANCE	18	0	1
GO_POSITIVE_REGULATION_OF_MEMBRANE_INVAGINATION	11	0	1
GO_HYDROGEN_PEROXIDE_CATABOLIC_PROCESS	20	0	1
GO_ICOSANOID_TRANSPORT	20	0	1
GO_POSITIVE_REGULATION_OF_CYTOKINE_PRODUCTION_INVOLVED_IN_IMMUNE_RESPONSE	29	0	1
GO_CELLULAR_RESPONSE_TO_LIGHT_STIMULUS	89	0	1
GO_POSITIVE_REGULATION_BY_HOST_OF_VIRAL_TRANSCRIPTION	12	0	1
GO_NEGATIVE_REGULATION_OF_STEM_CELL_DIFFERENTIATION	41	0	1
GO_NEGATIVE_REGULATION_OF_PRODUCTION_OF_MOLECULAR_MEDIATOR_OF_IMMUNE_RESPONSE	28	0	1
GO_SPHINGOLIPID_MEDIATED_SIGNALING_PATHWAY	12	0	1
GO_SYNAPTIC_VESICLE_CYTOSKELETAL_TRANSPORT	12	0	1
GO_PLATELET_ACTIVATION	140	0	1
GO_NUCLEOTIDE_BINDING_DOMAIN_LEUCINE_RICH_REPEAT_CONTAINING_RECEPTOR_SIGNALING_PATHWAY	27	0	1
GO_TRANSCRIPTION_COUPLED_NUCLEOTIDE_EXCISION_REPAIR	72	0	1
GO_MEMBRANE_DEPOLARIZATION_DURING_ACTION_POTENTIAL	39	0	1
GO_BETA_AMYLOID_METABOLIC_PROCESS	14	0	1
GO_REGULATION_OF_SPHINGOLIPID_BIOSYNTHETIC_PROCESS	13	0	1
GO_NON_CANONICAL_WNT_SIGNALING_PATHWAY	136	0	1
GO_RENAL_SYSTEM_PROCESS_INVOLVED_IN_REGULATION_OF_BLOOD_VOLUME	17	0	1
GO_NEGATIVE_REGULATION_OF_LEUKOCYTE_MEDIATED_IMMUNITY	43	0	1
GO_POSITIVE_REGULATION_OF_CREB_TRANSCRIPTION_FACTOR_ACTIVITY	14	0	1
GO_MODIFIED_AMINO_ACID_TRANSPORT	26	0	1
GO_CGMP_BIOSYNTHETIC_PROCESS	15	0	1
GO_ALTERNATIVE_MRNA_SPLICING_VIA_SPLICEOSOME	10	0	1
GO_ASSOCIATIVE_LEARNING	71	0	1
GO_SNORNA_METABOLIC_PROCESS	11	0	1
GO_REGULATION_OF_RESPONSE_TO_EXTRACELLULAR_STIMULUS	168	0	1
GO_COFACTOR_TRANSPORT	26	0	1
GO_POSITIVE_REGULATION_OF_FAT_CELL_DIFFERENTIATION	47	0	1
GO_EXOGENOUS_DRUG_CATABOLIC_PROCESS	10	0	1
GO_NEGATIVE_REGULATION_OF_REACTIVE_OXYGEN_SPECIES_METABOLIC_PROCESS	41	0	1
GO_REGULATION_OF_PROTEIN_DEACETYLATION	32	0	1
GO_OTIC_VESICLE_DEVELOPMENT	15	0	1
GO_POSITIVE_REGULATION_OF_DNA_TEMPLATED_TRANSCRIPTION_INITIATION	23	0	1
GO_NEURON_PROJECTION_EXTENSION_INVOLVED_IN_NEURON_PROJECTION_GUIDANCE	11	0	1
GO_PHOSPHOLIPID_DEPHOSPHORYLATION	24	0	1
GO_NEGATIVE_REGULATION_OF_DNA_REPAIR	13	0	1
GO_INSULIN_SECRETION	38	0	1
GO_POSITIVE_REGULATION_OF_FIBROBLAST_PROLIFERATION	52	0	1
GO_PREASSEMBLY_OF_GPI_ANCHOR_IN_ER_MEMBRANE	15	0	1
GO_NECROTIC_CELL_DEATH	28	0	1
GO_REGULATION_OF_MAST_CELL_ACTIVATION_INVOLVED_IN_IMMUNE_RESPONSE	30	0	1
GO_POSITIVE_REGULATION_OF_CELLULAR_AMINE_METABOLIC_PROCESS	13	0	1
GO_REGULATION_BY_VIRUS_OF_VIRAL_PROTEIN_LEVELS_IN_HOST_CELL	10	0	1
GO_REGULATION_OF_RESPIRATORY_SYSTEM_PROCESS	15	0	1
GO_POSITIVE_REGULATION_OF_ADENYLATE_CYCLASE_ACTIVITY	46	0	1
GO_EMBRYONIC_SKELETAL_SYSTEM_MORPHOGENESIS	93	0	1
GO_ATP_SYNTHESIS_COUPLED_PROTON_TRANSPORT	23	0	1
GO_ACTIVATION_OF_GTPASE_ACTIVITY	75	0	1
GO_INOSITOL_PHOSPHATE_METABOLIC_PROCESS	56	0	1
GO_T_CELL_HOMEOSTASIS	34	0	1
GO_REGULATION_OF_RECEPTOR_ACTIVITY	116	0	1
GO_HISTONE_METHYLATION	75	0	1
GO_CELLULAR_RESPONSE_TO_FLUID_SHEAR_STRESS	19	0	1
GO_POSITIVE_REGULATION_OF_TRANSPORTER_ACTIVITY	71	0	1
GO_POSITIVE_REGULATION_OF_TRANSCRIPTION_FACTOR_IMPORT_INTO_NUCLEUS	50	0	1
GO_CELLULAR_RESPONSE_TO_SUPEROXIDE	14	0	1
GO_ESTABLISHMENT_OF_PROTEIN_LOCALIZATION_TO_CHROMOSOME	11	0	1
GO_PEPTIDE_CROSS_LINKING	55	0	1
GO_CELLULAR_RESPONSE_TO_EXTRACELLULAR_STIMULUS	183	0	1
GO_ROUNDABOUT_SIGNALING_PATHWAY	11	0	1
GO_NEGATIVE_REGULATION_OF_RESPONSE_TO_DNA_DAMAGE_STIMULUS	49	0	1
GO_GLUTAMATE_METABOLIC_PROCESS	28	0	1
GO_SPHINGOMYELIN_METABOLIC_PROCESS	13	0	1
GO_TRNA_METABOLIC_PROCESS	165	0	1
GO_NEGATIVE_REGULATION_OF_ATPASE_ACTIVITY	13	0	1
GO_REGULATION_OF_DENDRITE_MORPHOGENESIS	72	0	1
GO_CELLULAR_RESPONSE_TO_LITHIUM_ION	17	0	1
GO_CELLULAR_RESPONSE_TO_PROSTAGLANDIN_STIMULUS	24	0	1
GO_NOTCH_RECEPTOR_PROCESSING	16	0	1
GO_CELLULAR_RESPONSE_TO_CADMIUM_ION	15	0	1
GO_SUCKLING_BEHAVIOR	13	0	1
GO_POSITIVE_REGULATION_OF_KIDNEY_DEVELOPMENT	41	0	1
GO_REGULATION_OF_MITOTIC_SPINDLE_CHECKPOINT	10	0	1
GO_I_KAPPAB_KINASE_NF_KAPPAB_SIGNALING	69	0	1
GO_REGULATION_OF_NON_CANONICAL_WNT_SIGNALING_PATHWAY	19	0	1
GO_CHROMOSOME_LOCALIZATION_TO_NUCLEAR_ENVELOPE_INVOLVED_IN_HOMOLOGOUS_CHROMOSOME_SEGREGATION	9	0	1
GO_NEGATIVE_REGULATION_OF_DNA_RECOMBINATION	15	0	1
GO_POSITIVE_REGULATION_OF_CELLULAR_EXTRAVASATION	12	0	1
GO_MYELOID_LEUKOCYTE_DIFFERENTIATION	93	0	1
GO_PEROXISOME_ORGANIZATION	33	0	1
GO_DNA_STRAND_ELONGATION_INVOLVED_IN_DNA_REPLICATION	25	0	1
GO_CELLULAR_MODIFIED_AMINO_ACID_CATABOLIC_PROCESS	17	0	1
GO_POLYOL_METABOLIC_PROCESS	94	0	1
GO_POSITIVE_REGULATION_OF_TRANSCRIPTION_INITIATION_FROM_RNA_POLYMERASE_II_PROMOTER	16	0	1
GO_APICAL_JUNCTION_ASSEMBLY	39	0	1
GO_LYMPHOCYTE_HOMEOSTASIS	50	0	1
GO_SERTOLI_CELL_DEVELOPMENT	15	0	1
GO_NEGATIVE_REGULATION_OF_RNA_SPLICING	24	0	1
GO_ENDOSOME_TO_LYSOSOME_TRANSPORT	40	0	1
GO_RESPONSE_TO_ANGIOTENSIN	17	0	1
GO_DENDRITIC_SPINE_DEVELOPMENT	19	0	1
GO_REGULATION_OF_PROTEIN_OLIGOMERIZATION	31	0	1
GO_HEME_METABOLIC_PROCESS	29	0	1
GO_SERINE_FAMILY_AMINO_ACID_BIOSYNTHETIC_PROCESS	15	0	1
GO_CEREBELLAR_PURKINJE_CELL_LAYER_FORMATION	11	0	1
GO_CELLULAR_RESPONSE_TO_CARBOHYDRATE_STIMULUS	72	0	1
GO_INOSITOL_PHOSPHATE_CATABOLIC_PROCESS	11	0	1
GO_C21_STEROID_HORMONE_METABOLIC_PROCESS	25	0	1
GO_NEGATIVE_REGULATION_OF_GLIAL_CELL_DIFFERENTIATION	24	0	1
GO_POSITIVE_REGULATION_OF_SYNAPSE_ASSEMBLY	55	0	1
GO_POSITIVE_REGULATION_OF_VASCULATURE_DEVELOPMENT	130	0	1
GO_POSITIVE_REGULATION_OF_EPIDERMAL_CELL_DIFFERENTIATION	19	0	1
[truncated: 4,167 more rows]
